# Supplementary material for: Extreme HOT regions are CpG-dense promoters in C. elegans and humans
Source: HighWire-hosted journal article supplement (doi:10.1101/gr.161992.113), 2014-03-20
Supplement: Supplemental_Figure_Legends.docx [file Supplemental_Figure_Legends.docx]

Supplementary Fig. S1. Diagram illustrating the method for identifying overlapping TF binding regions. Each blue line represents a hypothetical binding region identified by ChIP. After defining an extended region of TF overlap (shown in black), we further defined a core region (in red) as the region having the highest occupancy.

Supplementary Fig. S2. The distribution of CpG dunucleotides and GC content near *C. elegans* and human TSSs. Signal distributions for CpG density, normalized CpG (CpG O/E: observed/expected CpGs in 200bp window) and percentage of GC content (in 200bp) were plotted in 2 kb windows centered at all TSSs (green) or top 20% CpG TSSs (blue).

Supplementary Fig. S3. Examples of CpG dense promoters in *C. elegans*. DNA sequences 300bp upstream of the indicated coding TSSs (Chen et al. 2013) are shown.

Supplementary Fig. S4. Nucleosome depletion is linked with high normalized CpG density but not high GC content at *C. elegans* promoters. (A) Plots of normalized CpG (O/E: observed/expected) and nucleosome density across promoters of ubiquitous genes in the top 20% of expression with high (red, top 20%) or low (dark grey, bottom 40%) normalized CpG content (O/E: CpGs in a 200bp window). (B) Signal distributions of ubiquitous promoters in the top 20% of GC content separated into those in the top 20% (light grey) or bottom 40% (brown) of CpG content. (C) The indicated signal distributions of ubiquitous promoters with a narrow range of closely matched high GC content (45-48%) in the top 20% (blue) or bottom 40% (green) of CpG content. CpG and GC contents were calculated in windows 200 bp upstream of TSSs.

Supplementary Fig. S5. *C. elegans* CFP-1 protein contains a conserved CXXC domain. The indicated proteins sequences were analysed using Clustal Omega (EBI: http://www.ebi.ac.uk/Tools/msa/clustalo/). Ce: *C. elegans*, Ds: *D. melanogaster*, Ms: mouse and Hu: human. The highlighted amino acid residues are the conserved cysteines in the CXXC motifs (Tate et al. 2010).

Supplementary Fig. S6. CFP-1 targets contain high CpG density and H3K4me3 signals. (A) Frequency of the indicated mono and di-nucleotides at CFP-1 sites (n=3087) is shown relative to the genome-wide frequency scaled to 1 (black line). (B) CFP-1, H3K4me3 ChIPs and CpG density were analysed and displayed in heat maps. All panels are plotted in 2kb windows centered by CFP-1 sites. The color scheme shows the scale (0 to 15) for ChIP signal (input normalized) and CpG content (200 bp window).

Supplementary Fig. S7. Chromatin signatures at CFP-1 sites. Heat map plots of CFP-1, H3K4me3, and H3K4me1 ChIP signal across the indicated regions. (A) CFP-1 binding sites separated by genomic location: Wormbase TSSs, intergenic regions, and genic regions (within genes). CFP-1 sites mapping to intergenic and genic regions are enriched for having promoter-like chromatin signatures (H3K4me3high and H3K4me1low), similar to those at Wormbase TSSs (those mapping +/- 500 bp of a Wormbase transcript start site), (B) In contrast, CFP-1 has low signal in COLD regions, which mainly display enhancer-like chromatin features (H3K4me3low and H3K4me1high). All data sets are plotted in 1kb windows centered at the midpoint of core regions. The scale gives the enrichment of ChIP signals in log2.

Supplementary Fig. S8. Distribution of *in vitro* nucleosome assembly signal at *C. elegans* CpG-rich promoters. Plots show *in vitro* nucleosome read coverage signal across CpG-dense (top 20% CpG density) promoters of active (top 20% expression) ubiquitous coding genes, centered at TSSs. The two datasets are from Locke et al. 2013, where nucleosomes were reconstituted on genomic DNA fragmented by the indicated restriction enzyme, then isolated and sequenced after micrococcal nuclease digestion. Lines show mean signal, darker filled areas show standard error, and lighter filled areas are 95% confidence intervals.

Supplementary Fig. S9. *Drosophila* HOT regions show promoter chromatin signatures. (A) H3K4me3 and H3K4me1 ChIP signals plotted at the centers of core TF overlap regions ranked by TF occupancy in *D. melanogaster*. TF overlap regions: 341 (top 1%), 1,326 (top 2-5%), 7,665 (top 6-30%) and 22,836 (bottom 70%) regions are plotted. In all TF overlap regions, the number of TFs and the percentage of TF target regions overlapping promoter proximal regions are indicated on the right for each group. 60 % of HOT regions (top 1%) and 8 % of COLD regions (TF=1) overlap promoter regions (annotated TSSs +/- 500bp). The scale gives the enrichment of ChIP signals in log2. (B) Frequency of the indicated mono and di-nucleotides in HOT (red), COLD (blue) regions is shown relative to the genome-wide frequency scaled to 1 (black line).

Supplementary Table S1 HOT regions used for reporter gene assays and information on their expression patterns. Coordinates indicate the start and end of region cloned in the orientation used. Scoring was done in L4 larvae and young adult worms.

Supplementary Table S2 Strains generated in this study

Supplementary Table S3 primers information

Supplementary Table S4 The distribution of enriched CpG regions (CGIs from Wu et al. 2010) in the *C. elegans* genome in different gene regions. The data set was obtained from <http://rafalab.jhsph.edu/CGI/model-based-cpg-islands-ce2.txt>.

Supplementary File S1 Information of TF-overlap regions

Supplementary File S2 Genomic coordinates for HOT and COLD regions

Supplementary File S3 Information of ChIP sequencing data sets from ENCODE and ModENCODE consortia.

Supplemental File S4 - Summarized peak calls for CFP-1 and H3K4me3 ChIP-seq experiments
