# Supplementary material for: Extreme HOT regions are CpG-dense promoters in C. elegans and humans
Source: HighWire-hosted journal article supplement (doi:10.1101/gr.161992.113), 2014-03-20
Supplement: Supplemental_Information_S3.xlsx [file Supplemental_Information_S3.xlsx]

## Sheet: Worm_TFs
FILENAME	FACTOR	STAGE	IDR OPTIMAL PEAKS BLACKLIST FILTERED	PEAK_CALL_FILE
OP124_AHA-1_L1_yale_stn_GFP	AHA-1	L1	592	spp.idrOptimal.bf.ce.OP124_AHA-1_L1_yale_stn_GFP_a_F_L_B_q30_Rep0.bam.unique.tagAlign_VS_OP124_AHA-1_L1_yale_stn_control_q30_Rep0.bam.unique.tagAlign.narrowPeak.gz
OP124_AHA-1_L4_yale_stn_GFP	AHA-1	L4	692	spp.idrOptimal.bf.ce.OP124_AHA-1_L4_yale_stn_GFP_a_F_L_B_q30_Rep0.bam.unique.tagAlign_VS_OP124_AHA-1_L4_yale_stn_control_q30_Rep0.bam.unique.tagAlign.narrowPeak.gz
OP217_ALY-2_L1_stanford_stn_GFP	ALY-2	L1	1349	spp.idrOptimal.bf.ce.OP217_ALY-2_L1_stanford_stn_GFP_a_F_L_B_q30_Rep0.bam.unique.tagAlign_VS_OP217_ALY-2_L1_stanford_stn_control_q30_Rep0.bam.unique.tagAlign.narrowPeak.gz
DCC4036_BLMP-1_EM_modencode_stn_GFP	BLMP-1	EM	1189	spp.idrOptimal.bf.ce.DCC4036_BLMP-1_EM_modencode_stn_GFP_a_F_L_B_q30_Rep0.bam.unique.tagAlign_VS_DCC4036_BLMP-1_EM_modencode_stn_control_q30_Rep0.bam.unique.tagAlign.narrowPeak.gz
OP109_BLMP-1_L1_yale_stn_GFP	BLMP-1	L1	8910	spp.idrOptimal.bf.ce.OP109_BLMP-1_L1_yale_stn_GFP_a_F_L_B_q30_Rep0.bam.unique.tagAlign_VS_OP109_BLMP-1_L1_yale_stn_control_q30_Rep0.bam.unique.tagAlign.narrowPeak.gz
OP343_C01B12.2_L2_yale_stn_GFP	C01B12.2	L2	5297	spp.idrOptimal.bf.ce.OP343_C01B12.2_L2_yale_stn_GFP_a_F_L_B_q30_Rep0.bam.unique.tagAlign_VS_OP343_C01B12.2_L2_yale_stn_control_q30_Rep0.bam.unique.tagAlign.narrowPeak.gz
OP345_C16A3.4_L1_yale_stn_GFP	C16A3.4	L1	3541	spp.idrOptimal.bf.ce.OP345_C16A3.4_L1_yale_stn_GFP_a_F_L_B_q30_Rep0.bam.unique.tagAlign_VS_OP345_C16A3.4_L1_yale_stn_control_q30_Rep0.bam.unique.tagAlign.narrowPeak.gz
OP425_C27D6.4_L2_stanford_stn_GFP	C27D6.4	L2	7345	spp.idrOptimal.bf.ce.OP425_C27D6.4_L2_stanford_stn_GFP_a_F_L_B_q30_Rep0.bam.unique.tagAlign_VS_OP425_C27D6.4_L2_stanford_stn_control_q30_Rep0.bam.unique.tagAlign.narrowPeak.gz
OP324_C34F6.9_L2_yale_stn_GFP	C34F6.9	L2	6493	spp.idrOptimal.bf.ce.OP324_C34F6.9_L2_yale_stn_GFP_a_F_L_B_q30_Rep0.bam.unique.tagAlign_VS_OP324_C34F6.9_L2_yale_stn_control_q30_Rep0.bam.unique.tagAlign.narrowPeak.gz
OP82_CEH-16_L2_yale_stn_GFP	CEH-16	L2	1932	spp.idrOptimal.bf.ce.OP82_CEH-16_L2_yale_stn_GFP_abc_F_L_B_q30_Rep0.bam.unique.tagAlign_VS_OP82_CEH-16_L2_yale_stn_control_q30_Rep0.bam.unique.tagAlign.narrowPeak.gz
OP82_CEH-16_L3_stanford_stn_GFP	CEH-16	L3	388	spp.idrOptimal.bf.ce.OP82_CEH-16_L3_stanford_stn_GFP_a_F_L_B_q30_Rep0.bam.unique.tagAlign_VS_OP82_CEH-16_L3_stanford_stn_control_q30_Rep0.bam.unique.tagAlign.narrowPeak.gz
OP500_CEH-26_LE_yale_stn_GFP	CEH-26	LE	940	spp.idrOptimal.bf.ce.OP500_CEH-26_LE_yale_stn_GFP_a_F_L_B_q30_Rep0.bam.unique.tagAlign_VS_OP500_CEH-26_LE_yale_stn_control_q30_Rep0.bam.unique.tagAlign.narrowPeak.gz
OP241_CEH-28_L3_stanford_stn_GFP	CEH-28	L3	3853	spp.idrOptimal.bf.ce.OP241_CEH-28_L3_stanford_stn_GFP_a_F_L_B_q30_Rep0.bam.unique.tagAlign_VS_OP241_CEH-28_L3_stanford_stn_control_q30_Rep0.bam.unique.tagAlign.narrowPeak.gz
OP241_CEH-28_L4_stanford_stn_GFP	CEH-28	L4	1592	spp.idrOptimal.bf.ce.OP241_CEH-28_L4_stanford_stn_GFP_a_F_L_B_q30_Rep0.bam.unique.tagAlign_VS_OP241_CEH-28_L4_stanford_stn_control_q30_Rep0.bam.unique.tagAlign.narrowPeak.gz
OP120_CEH-30_LE_yale_stn_GFP	CEH-30	LE	672	spp.idrOptimal.bf.ce.OP120_CEH-30_LE_yale_stn_GFP_a_F_L_B_q30_Rep0.bam.unique.tagAlign_VS_OP120_CEH-30_LE_yale_stn_control_q30_Rep0.bam.unique.tagAlign.narrowPeak.gz
DCC3858_CEH-39_EM_modencode_stn_GFP	CEH-39	EM	2515	spp.idrOptimal.bf.ce.DCC3858_CEH-39_EM_modencode_stn_GFP_a_F_L_B_q30_Rep0.bam.unique.tagAlign_VS_DCC3858_CEH-39_EM_modencode_stn_control_q30_Rep0.bam.unique.tagAlign.narrowPeak.gz
OP169_CEH-39_LE_stanford_stn_GFP	CEH-39	LE	2494	spp.idrOptimal.bf.ce.OP169_CEH-39_LE_stanford_stn_GFP_a_F_L_B_q30_Rep0.bam.unique.tagAlign_VS_OP169_CEH-39_LE_stanford_stn_control_q30_Rep0.bam.unique.tagAlign.narrowPeak.gz
OP174_CES-1_L1_stanford_stn_GFP	CES-1	L1	388	spp.idrOptimal.bf.ce.OP174_CES-1_L1_stanford_stn_GFP_a_F_L_B_q30_Rep0.bam.unique.tagAlign_VS_OP174_CES-1_L1_stanford_stn_control_q30_Rep0.bam.unique.tagAlign.narrowPeak.gz
OP174_CES-1_L3_stanford_stn_GFP	CES-1	L3	345	spp.idrOptimal.bf.ce.OP174_CES-1_L3_stanford_stn_GFP_ab_F_L_B_q30_Rep0.bam.unique.tagAlign_VS_OP174_CES-1_L3_stanford_stn_control_q30_Rep0.bam.unique.tagAlign.narrowPeak.gz
OP174_CES-1_L4_stanford_stn_GFP	CES-1	L4	1407	spp.idrOptimal.bf.ce.OP174_CES-1_L4_stanford_stn_GFP_ab_F_L_B_q30_Rep0.bam.unique.tagAlign_VS_OP174_CES-1_L4_stanford_stn_control_q30_Rep0.bam.unique.tagAlign.narrowPeak.gz
OP174_CES-1_LE_stanford_stn_GFP	CES-1	LE	8676	spp.idrOptimal.bf.ce.OP174_CES-1_LE_stanford_stn_GFP_a_F_L_B_q30_Rep0.bam.unique.tagAlign_VS_OP174_CES-1_LE_stanford_stn_control_q30_Rep0.bam.unique.tagAlign.narrowPeak.gz
XE1464_DAF-16_L4_yale_stn_GFP	DAF-16	L4	7523	spp.idrOptimal.bf.ce.XE1464_DAF-16_L4_yale_stn_GFP_a_F_L_B_q30_Rep0.bam.unique.tagAlign_VS_XE1464_DAF-16_L4_yale_stn_control_q30_Rep0.bam.unique.tagAlign.narrowPeak.gz
OP105_DPL-1_L1_yale_stn_GFP	DPL-1	L1	3194	spp.idrOptimal.bf.ce.OP105_DPL-1_L1_yale_stn_GFP_a_F_L_B_q30_Rep0.bam.unique.tagAlign_VS_OP105_DPL-1_L1_yale_stn_control_q30_Rep0.bam.unique.tagAlign.narrowPeak.gz
YL425_DPL-1_L1_yale_stn_GFP	DPL-1	L1	5252	spp.idrOptimal.bf.ce.YL425_DPL-1_L1_yale_stn_GFP_a_F_L_B_q30_Rep0.bam.unique.tagAlign_VS_YL425_DPL-1_L1_yale_stn_control_q30_Rep0.bam.unique.tagAlign.narrowPeak.gz
YL448_DPL-1_L1_yale_stn_GFP	DPL-1	L1	4327	spp.idrOptimal.bf.ce.YL448_DPL-1_L1_yale_stn_GFP_a_F_L_B_q30_Rep0.bam.unique.tagAlign_VS_YL448_DPL-1_L1_yale_stn_control_q30_Rep0.bam.unique.tagAlign.narrowPeak.gz
OP105_DPL-1_L4_yale_stn_GFP	DPL-1	L4	4182	spp.idrOptimal.bf.ce.OP105_DPL-1_L4_yale_stn_GFP_a_F_L_B_q30_Rep0.bam.unique.tagAlign_VS_OP105_DPL-1_L4_yale_stn_control_q30_Rep0.bam.unique.tagAlign.narrowPeak.gz
YL390_DPL-1_YA_yale_stn_GFP	DPL-1	YA	1877	spp.idrOptimal.bf.ce.YL390_DPL-1_YA_yale_stn_GFP_a_F_L_B_q30_Rep0.bam.unique.tagAlign_VS_YL390_DPL-1_YA_yale_stn_control_q30_Rep0.bam.unique.tagAlign.narrowPeak.gz
N2_EFL-1_L1_yale_stn_EFL	EFL-1	L1	6182	spp.idrOptimal.bf.ce.N2_EFL-1_L1_yale_stn_EFL_a_F_L_B_q30_Rep0.bam.unique.tagAlign_VS_N2_EFL-1_L1_yale_stn_control_q30_Rep0.bam.unique.tagAlign.narrowPeak.gz
YL418_EFL-1_L1_yale_stn_GFP	EFL-1	L1	2332	spp.idrOptimal.bf.ce.YL418_EFL-1_L1_yale_stn_GFP_a_F_L_B_q30_Rep0.bam.unique.tagAlign_VS_YL418_EFL-1_L1_yale_stn_control_q30_Rep0.bam.unique.tagAlign.narrowPeak.gz
YL424_EFL-1_L1_yale_stn_GFP	EFL-1	L1	4385	spp.idrOptimal.bf.ce.YL424_EFL-1_L1_yale_stn_GFP_a_F_L_B_q30_Rep0.bam.unique.tagAlign_VS_YL424_EFL-1_L1_yale_stn_control_q30_Rep0.bam.unique.tagAlign.narrowPeak.gz
YL445_EFL-1_YA_yale_stn_GFP	EFL-1	YA	3046	spp.idrOptimal.bf.ce.YL445_EFL-1_YA_yale_stn_GFP_a_F_L_B_q30_Rep0.bam.unique.tagAlign_VS_YL445_EFL-1_YA_yale_stn_control_q30_Rep0.bam.unique.tagAlign.narrowPeak.gz
OP177_EGL-27_L1_stanford_15c_GFP	EGL-27	L1	620	spp.idrOptimal.bf.ce.OP177_EGL-27_L1_stanford_15c_GFP_a_F_L_B_q30_Rep0.bam.unique.tagAlign_VS_OP177_EGL-27_L1_stanford_15c_control_q30_Rep0.bam.unique.tagAlign.narrowPeak.gz
OP177_EGL-27_L1_stanford_stn_GFP	EGL-27	L1	775	spp.idrOptimal.bf.ce.OP177_EGL-27_L1_stanford_stn_GFP_a_F_L_B_q30_Rep0.bam.unique.tagAlign_VS_OP177_EGL-27_L1_stanford_stn_control_q30_Rep0.bam.unique.tagAlign.narrowPeak.gz
OP177_EGL-27_L1_yale_stn_GFP	EGL-27	L1	607	spp.idrOptimal.bf.ce.OP177_EGL-27_L1_yale_stn_GFP_a_F_L_B_q30_Rep0.bam.unique.tagAlign_VS_OP177_EGL-27_L1_yale_stn_control_q30_Rep0.bam.unique.tagAlign.narrowPeak.gz
OP177_EGL-27_L2_stanford_15c_GFP	EGL-27	L2	2708	spp.idrOptimal.bf.ce.OP177_EGL-27_L2_stanford_15c_GFP_abc_F_L_B_q30_Rep0.bam.unique.tagAlign_VS_OP177_EGL-27_L2_stanford_15c_control_q30_Rep0.bam.unique.tagAlign.narrowPeak.gz
OP177_EGL-27_L3_stanford_15c_GFP	EGL-27	L3	811	spp.idrOptimal.bf.ce.OP177_EGL-27_L3_stanford_15c_GFP_b_F_L_B_q30_Rep0.bam.unique.tagAlign_VS_OP177_EGL-27_L3_stanford_15c_control_q30_Rep0.bam.unique.tagAlign.narrowPeak.gz
OP177_EGL-27_L4_stanford_stn_GFP	EGL-27	L4	180	spp.idrOptimal.bf.ce.OP177_EGL-27_L4_stanford_stn_GFP_a_F_L_B_q30_Rep0.bam.unique.tagAlign_VS_OP177_EGL-27_L4_stanford_stn_control_q30_Rep0.bam.unique.tagAlign.narrowPeak.gz
OP354_ELT-1_L3_yale_stn_GFP	ELT-1	L3	2546	spp.idrOptimal.bf.ce.OP354_ELT-1_L3_yale_stn_GFP_ab_F_L_B_q30_Rep0.bam.unique.tagAlign_VS_OP354_ELT-1_L3_yale_stn_control_q30_Rep0.bam.unique.tagAlign.narrowPeak.gz
OP75_ELT-3_EM_stanford_stn_GFP	ELT-3	EM	848	spp.idrOptimal.bf.ce.OP75_ELT-3_EM_stanford_stn_GFP_a_F_L_B_q30_Rep0.bam.unique.tagAlign_VS_OP75_ELT-3_EM_stanford_stn_control_q30_Rep0.bam.unique.tagAlign.narrowPeak.gz
OP75_ELT-3_L1_stanford_f30_GFP	ELT-3	L1	1572	spp.idrOptimal.bf.ce.OP75_ELT-3_L1_stanford_f30_GFP_a_F_L_B_q30_Rep0.bam.unique.tagAlign_VS_OP75_ELT-3_L1_stanford_f30_control_q30_Rep0.bam.unique.tagAlign.narrowPeak.gz
OP75_ELT-3_L1_stanford_ft1_GFP	ELT-3	L1	306	spp.idrOptimal.bf.ce.OP75_ELT-3_L1_stanford_ft1_GFP_a_F_L_B_q30_Rep0.bam.unique.tagAlign_VS_OP75_ELT-3_L1_stanford_ft1_control_q30_Rep0.bam.unique.tagAlign.narrowPeak.gz
OP75_ELT-3_L1_stanford_ft3_GFP	ELT-3	L1	1034	spp.idrOptimal.bf.ce.OP75_ELT-3_L1_stanford_ft3_GFP_a_F_L_B_q30_Rep0.bam.unique.tagAlign_VS_OP75_ELT-3_L1_stanford_ft3_control_q30_Rep0.bam.unique.tagAlign.narrowPeak.gz
OP75_ELT-3_L1_stanford_stn_GFP	ELT-3	L1	3888	spp.idrOptimal.bf.ce.OP75_ELT-3_L1_stanford_stn_GFP_a_F_L_B_q30_Rep0.bam.unique.tagAlign_VS_OP75_ELT-3_L1_stanford_stn_control_q30_Rep0.bam.unique.tagAlign.narrowPeak.gz
OP75_ELT-3_L1_yale_stn_GFP	ELT-3	L1	4435	spp.idrOptimal.bf.ce.OP75_ELT-3_L1_yale_stn_GFP_b_F_L_B_q30_Rep0.bam.unique.tagAlign_VS_OP75_ELT-3_L1_yale_stn_control_q30_Rep0.bam.unique.tagAlign.narrowPeak.gz
OP75_ELT-3_L3_stanford_pep_GFP	ELT-3	L3	1346	spp.idrOptimal.bf.ce.OP75_ELT-3_L3_stanford_pep_GFP_a_F_L_B_q30_Rep0.bam.unique.tagAlign_VS_OP75_ELT-3_L3_stanford_pep_control_q30_Rep0.bam.unique.tagAlign.narrowPeak.gz
OP75_ELT-3_L3_stanford_stn_GFP	ELT-3	L3	1238	spp.idrOptimal.bf.ce.OP75_ELT-3_L3_stanford_stn_GFP_a_F_L_B_q30_Rep0.bam.unique.tagAlign_VS_OP75_ELT-3_L3_stanford_stn_control_q30_Rep0.bam.unique.tagAlign.narrowPeak.gz
DCC3160_EOR-1_L3_modencode_stn_ANB	EOR-1	L3	1586	spp.idrOptimal.bf.ce.DCC3160_EOR-1_L3_modencode_stn_ANB_a_F_L_B_q30_Rep0.bam.unique.tagAlign_VS_DCC3160_EOR-1_L3_modencode_stn_control_q30_Rep0.bam.unique.tagAlign.narrowPeak.gz
OP81_EOR-1_L3_yale_stn_GFP	EOR-1	L3	779	spp.idrOptimal.bf.ce.OP81_EOR-1_L3_yale_stn_GFP_a_F_L_B_q30_Rep0.bam.unique.tagAlign_VS_OP81_EOR-1_L3_yale_stn_control_q30_Rep0.bam.unique.tagAlign.narrowPeak.gz
OP114_F16B12.6_L1_yale_stn_GFP	F16B12.6	L1	2685	spp.idrOptimal.bf.ce.OP114_F16B12.6_L1_yale_stn_GFP_a_F_L_B_q30_Rep0.bam.unique.tagAlign_VS_OP114_F16B12.6_L1_yale_stn_control_q30_Rep0.bam.unique.tagAlign.narrowPeak.gz
OP327_F23F12.9_EM_yale_stn_GFP	F23F12.9	EM	2235	spp.idrOptimal.bf.ce.OP327_F23F12.9_EM_yale_stn_GFP_ab_F_L_B_q30_Rep0.bam.unique.tagAlign_VS_OP327_F23F12.9_EM_yale_stn_control_q30_Rep0.bam.unique.tagAlign.narrowPeak.gz
OP212_F45C12.2_L1_stanford_f30_GFP	F45C12.2	L1	4415	spp.idrOptimal.bf.ce.OP212_F45C12.2_L1_stanford_f30_GFP_a_F_L_B_q30_Rep0.bam.unique.tagAlign_VS_OP212_F45C12.2_L1_stanford_f30_control_q30_Rep0.bam.unique.tagAlign.narrowPeak.gz
OP212_F45C12.2_L1_stanford_ft2_GFP	F45C12.2	L1	2491	spp.idrOptimal.bf.ce.OP212_F45C12.2_L1_stanford_ft2_GFP_a_F_L_B_q30_Rep0.bam.unique.tagAlign_VS_OP212_F45C12.2_L1_stanford_ft2_control_q30_Rep0.bam.unique.tagAlign.narrowPeak.gz
OP212_F45C12.2_L1_stanford_ft4_GFP	F45C12.2	L1	2420	spp.idrOptimal.bf.ce.OP212_F45C12.2_L1_stanford_ft4_GFP_a_F_L_B_q30_Rep0.bam.unique.tagAlign_VS_OP212_F45C12.2_L1_stanford_ft4_control_q30_Rep0.bam.unique.tagAlign.narrowPeak.gz
OP212_F45C12.2_L2_stanford_stn_GFP	F45C12.2	L2	494	spp.idrOptimal.bf.ce.OP212_F45C12.2_L2_stanford_stn_GFP_a_F_L_B_q30_Rep0.bam.unique.tagAlign_VS_OP212_F45C12.2_L2_stanford_stn_control_q30_Rep0.bam.unique.tagAlign.narrowPeak.gz
OP212_F45C12.2_L3_stanford_stn_GFP	F45C12.2	L3	798	spp.idrOptimal.bf.ce.OP212_F45C12.2_L3_stanford_stn_GFP_a_F_L_B_q30_Rep0.bam.unique.tagAlign_VS_OP212_F45C12.2_L3_stanford_stn_control_q30_Rep0.bam.unique.tagAlign.narrowPeak.gz
OP337_FKH-10_L1_stanford_stn_GFP	FKH-10	L1	2559	spp.idrOptimal.bf.ce.OP337_FKH-10_L1_stanford_stn_GFP_a_F_L_B_q30_Rep0.bam.unique.tagAlign_VS_OP337_FKH-10_L1_stanford_stn_control_q30_Rep0.bam.unique.tagAlign.narrowPeak.gz
DCC4027_FKH-10_L3_modencode_stn_GFP	FKH-10	L3	2342	spp.idrOptimal.bf.ce.DCC4027_FKH-10_L3_modencode_stn_GFP_a_F_L_B_q30_Rep0.bam.unique.tagAlign_VS_DCC4027_FKH-10_L3_modencode_stn_control_q30_Rep0.bam.unique.tagAlign.narrowPeak.gz
OP337_FKH-10_L3_stanford_stn_GFP	FKH-10	L3	2369	spp.idrOptimal.bf.ce.OP337_FKH-10_L3_stanford_stn_GFP_a_F_L_B_q30_Rep0.bam.unique.tagAlign_VS_OP337_FKH-10_L3_stanford_stn_control_q30_Rep0.bam.unique.tagAlign.narrowPeak.gz
OP337_FKH-10_L4_stanford_stn_GFP	FKH-10	L4	2578	spp.idrOptimal.bf.ce.OP337_FKH-10_L4_stanford_stn_GFP_a_F_L_B_q30_Rep0.bam.unique.tagAlign_VS_OP337_FKH-10_L4_stanford_stn_control_q30_Rep0.bam.unique.tagAlign.narrowPeak.gz
DCC4025_FKH-10_LE_modencode_stn_GFP	FKH-10	LE	400	spp.idrOptimal.bf.ce.DCC4025_FKH-10_LE_modencode_stn_GFP_a_F_L_B_q30_Rep0.bam.unique.tagAlign_VS_DCC4025_FKH-10_LE_modencode_stn_control_q30_Rep0.bam.unique.tagAlign.narrowPeak.gz
OP185_FKH-2_L3_stanford_stn_GFP	FKH-2	L3	230	spp.idrOptimal.bf.ce.OP185_FKH-2_L3_stanford_stn_GFP_a_F_L_B_q30_Rep0.bam.unique.tagAlign_VS_OP185_FKH-2_L3_stanford_stn_control_q30_Rep0.bam.unique.tagAlign.narrowPeak.gz
OP304_FOS-1_L1_stanford_stn_GFP	FOS-1	L1	2380	spp.idrOptimal.bf.ce.OP304_FOS-1_L1_stanford_stn_GFP_a_F_L_B_q30_Rep0.bam.unique.tagAlign_VS_OP304_FOS-1_L1_stanford_stn_control_q30_Rep0.bam.unique.tagAlign.narrowPeak.gz
OP304_FOS-1_L2_stanford_stn_GFP	FOS-1	L2	9369	spp.idrOptimal.bf.ce.OP304_FOS-1_L2_stanford_stn_GFP_a_F_L_B_q30_Rep0.bam.unique.tagAlign_VS_OP304_FOS-1_L2_stanford_stn_control_q30_Rep0.bam.unique.tagAlign.narrowPeak.gz
OP304_FOS-1_L3_stanford_stn_GFP	FOS-1	L3	703	spp.idrOptimal.bf.ce.OP304_FOS-1_L3_stanford_stn_GFP_a_F_L_B_q30_Rep0.bam.unique.tagAlign_VS_OP304_FOS-1_L3_stanford_stn_control_q30_Rep0.bam.unique.tagAlign.narrowPeak.gz
OP179_GEI-11_EM_yale_stn_GFP	GEI-11	EM	1538	spp.idrOptimal.bf.ce.OP179_GEI-11_EM_yale_stn_GFP_a_F_L_B_q30_Rep0.bam.unique.tagAlign_VS_OP179_GEI-11_EM_yale_stn_control_q30_Rep0.bam.unique.tagAlign.narrowPeak.gz
OP179_GEI-11_L1_yale_stn_GFP	GEI-11	L1	2904	spp.idrOptimal.bf.ce.OP179_GEI-11_L1_yale_stn_GFP_a_F_L_B_q30_Rep0.bam.unique.tagAlign_VS_OP179_GEI-11_L1_yale_stn_control_q30_Rep0.bam.unique.tagAlign.narrowPeak.gz
OP179_GEI-11_L2_yale_stn_GFP	GEI-11	L2	2709	spp.idrOptimal.bf.ce.OP179_GEI-11_L2_yale_stn_GFP_a_F_L_B_q30_Rep0.bam.unique.tagAlign_VS_OP179_GEI-11_L2_yale_stn_control_q30_Rep0.bam.unique.tagAlign.narrowPeak.gz
OP179_GEI-11_L3_yale_stn_GFP	GEI-11	L3	3562	spp.idrOptimal.bf.ce.OP179_GEI-11_L3_yale_stn_GFP_a_F_L_B_q30_Rep0.bam.unique.tagAlign_VS_OP179_GEI-11_L3_yale_stn_control_q30_Rep0.bam.unique.tagAlign.narrowPeak.gz
OP179_GEI-11_L4_yale_stn_GFP	GEI-11	L4	447	spp.idrOptimal.bf.ce.OP179_GEI-11_L4_yale_stn_GFP_a_F_L_B_q30_Rep0.bam.unique.tagAlign_VS_OP179_GEI-11_L4_yale_stn_control_q30_Rep0.bam.unique.tagAlign.narrowPeak.gz
OP179a_GEI-11_YA_yale_stn_GFP	GEI-11	YA	1884	spp.idrOptimal.bf.ce.OP179a_GEI-11_YA_yale_stn_GFP_a_F_L_B_q30_Rep0.bam.unique.tagAlign_VS_OP179a_GEI-11_YA_yale_stn_control_q30_Rep0.bam.unique.tagAlign.narrowPeak.gz
OP179_GEI-11_YA_yale_stn_GFP	GEI-11	YA	1619	spp.idrOptimal.bf.ce.OP179_GEI-11_YA_yale_stn_GFP_ab_F_L_B_q30_Rep0.bam.unique.tagAlign_VS_OP179_GEI-11_YA_yale_stn_control_q30_Rep0.bam.unique.tagAlign.narrowPeak.gz
YL457_GEI-11_YA_yale_stn_GFP	GEI-11	YA	1729	spp.idrOptimal.bf.ce.YL457_GEI-11_YA_yale_stn_GFP_a_F_L_B_q30_Rep0.bam.unique.tagAlign_VS_YL457_GEI-11_YA_yale_stn_control_q30_Rep0.bam.unique.tagAlign.narrowPeak.gz
OP102_HAM-1_L1_yale_stn_GFP	HAM-1	L1	5640	spp.idrOptimal.bf.ce.OP102_HAM-1_L1_yale_stn_GFP_a_F_L_B_q30_Rep0.bam.unique.tagAlign_VS_OP102_HAM-1_L1_yale_stn_control_q30_Rep0.bam.unique.tagAlign.narrowPeak.gz
OP102_HAM-1_L4_yale_stn_GFP	HAM-1	L4	8430	spp.idrOptimal.bf.ce.OP102_HAM-1_L4_yale_stn_GFP_a_F_L_B_q30_Rep0.bam.unique.tagAlign_VS_OP102_HAM-1_L4_yale_stn_control_q30_Rep0.bam.unique.tagAlign.narrowPeak.gz
OP64_HLH-1_EM_yale_stn_GFP	HLH-1	EM	3368	spp.idrOptimal.bf.ce.OP64_HLH-1_EM_yale_stn_GFP_a_F_L_B_q30_Rep0.bam.unique.tagAlign_VS_OP64_HLH-1_EM_yale_stn_control_q30_Rep0.bam.unique.tagAlign.narrowPeak.gz
YL416_HPL-2_L1_yale_stn_GFP	HPL-2	L1	4218	spp.idrOptimal.bf.ce.YL416_HPL-2_L1_yale_stn_GFP_a_F_L_B_q30_Rep0.bam.unique.tagAlign_VS_YL416_HPL-2_L1_yale_stn_control_q30_Rep0.bam.unique.tagAlign.narrowPeak.gz
YL474_HPL-2_L1_yale_stn_GFP	HPL-2	L1	909	spp.idrOptimal.bf.ce.YL474_HPL-2_L1_yale_stn_GFP_a_F_L_B_q30_Rep0.bam.unique.tagAlign_VS_YL474_HPL-2_L1_yale_stn_control_q30_Rep0.bam.unique.tagAlign.narrowPeak.gz
OP234_JUN-1_L1_stanford_stn_GFP	35581	L1	2772	spp.idrOptimal.bf.ce.OP234_JUN-1_L1_stanford_stn_GFP_a_F_L_B_q30_Rep0.bam.unique.tagAlign_VS_OP234_JUN-1_L1_stanford_stn_control_q30_Rep0.bam.unique.tagAlign.narrowPeak.gz
OP234_JUN-1_L3_stanford_stn_GFP	35581	L3	3219	spp.idrOptimal.bf.ce.OP234_JUN-1_L3_stanford_stn_GFP_a_F_L_B_q30_Rep0.bam.unique.tagAlign_VS_OP234_JUN-1_L3_stanford_stn_control_q30_Rep0.bam.unique.tagAlign.narrowPeak.gz
OP234_JUN-1_L4_stanford_stn_GFP	35581	L4	1089	spp.idrOptimal.bf.ce.OP234_JUN-1_L4_stanford_stn_GFP_a_F_L_B_q30_Rep0.bam.unique.tagAlign_VS_OP234_JUN-1_L4_stanford_stn_control_q30_Rep0.bam.unique.tagAlign.narrowPeak.gz
OP62_LIN-11_L2_yale_stn_GFP	LIN-11	L2	2435	spp.idrOptimal.bf.ce.OP62_LIN-11_L2_yale_stn_GFP_a_F_L_B_q30_Rep0.bam.unique.tagAlign_VS_OP62_LIN-11_L2_yale_stn_control_q30_Rep0.bam.unique.tagAlign.narrowPeak.gz
OP51_LIN-13_EM_yale_stn_GFP	LIN-13	EM	1763	spp.idrOptimal.bf.ce.OP51_LIN-13_EM_yale_stn_GFP_a_F_L_B_q30_Rep0.bam.unique.tagAlign_VS_OP51_LIN-13_EM_yale_stn_control_q30_Rep0.bam.unique.tagAlign.narrowPeak.gz
OP49_LIN-13_L1_stanford_stn_GFP	LIN-13	L1	2318	spp.idrOptimal.bf.ce.OP49_LIN-13_L1_stanford_stn_GFP_a_F_L_B_q30_Rep0.bam.unique.tagAlign_VS_OP49_LIN-13_L1_stanford_stn_control_q30_Rep0.bam.unique.tagAlign.narrowPeak.gz
OP49_LIN-13_L2_stanford_stn_GFP	LIN-13	L2	4990	spp.idrOptimal.bf.ce.OP49_LIN-13_L2_stanford_stn_GFP_a_F_L_B_q30_Rep0.bam.unique.tagAlign_VS_OP49_LIN-13_L2_stanford_stn_control_q30_Rep0.bam.unique.tagAlign.narrowPeak.gz
OP49_LIN-13_L4_stanford_stn_GFP	LIN-13	L4	2602	spp.idrOptimal.bf.ce.OP49_LIN-13_L4_stanford_stn_GFP_a_F_L_B_q30_Rep0.bam.unique.tagAlign_VS_OP49_LIN-13_L4_stanford_stn_control_q30_Rep0.bam.unique.tagAlign.narrowPeak.gz
OP184_LIN-15B_L1_stanford_stn_GFP	LIN-15B	L1	1921	spp.idrOptimal.bf.ce.OP184_LIN-15B_L1_stanford_stn_GFP_a_F_L_B_q30_Rep0.bam.unique.tagAlign_VS_OP184_LIN-15B_L1_stanford_stn_control_q30_Rep0.bam.unique.tagAlign.narrowPeak.gz
OP184_LIN-15B_L3_stanford_stn_GFP	LIN-15B	L3	3834	spp.idrOptimal.bf.ce.OP184_LIN-15B_L3_stanford_stn_GFP_a_F_L_B_q30_Rep0.bam.unique.tagAlign_VS_OP184_LIN-15B_L3_stanford_stn_control_q30_Rep0.bam.unique.tagAlign.narrowPeak.gz
OP184_LIN-15B_L3_yale_stn_GFP	LIN-15B	L3	3839	spp.idrOptimal.bf.ce.OP184_LIN-15B_L3_yale_stn_GFP_a_F_L_B_q30_Rep0.bam.unique.tagAlign_VS_OP184_LIN-15B_L3_yale_stn_control_q30_Rep0.bam.unique.tagAlign.narrowPeak.gz
OP184_LIN-15B_L4_stanford_stn_GFP	LIN-15B	L4	271	spp.idrOptimal.bf.ce.OP184_LIN-15B_L4_stanford_stn_GFP_a_F_L_B_q30_Rep0.bam.unique.tagAlign_VS_OP184_LIN-15B_L4_stanford_stn_control_q30_Rep0.bam.unique.tagAlign.narrowPeak.gz
DCC4640_LIN-35_L1_modencode_stn_ANB	LIN-35	L1	4965	spp.idrOptimal.bf.ce.DCC4640_LIN-35_L1_modencode_stn_ANB_a_F_L_B_q30_Rep0.bam.unique.tagAlign_VS_DCC4640_LIN-35_L1_modencode_stn_control_q30_Rep0.bam.unique.tagAlign.narrowPeak.gz
YL398_LIN-35_L1_yale_stn_GFP	LIN-35	L1	9769	spp.idrOptimal.bf.ce.YL398_LIN-35_L1_yale_stn_GFP_a_F_L_B_q30_Rep0.bam.unique.tagAlign_VS_YL398_LIN-35_L1_yale_stn_control_q30_Rep0.bam.unique.tagAlign.narrowPeak.gz
YL409_LIN-35_L1_yale_stn_GFP	LIN-35	L1	4791	spp.idrOptimal.bf.ce.YL409_LIN-35_L1_yale_stn_GFP_ab_F_L_B_q30_Rep0.bam.unique.tagAlign_VS_YL409_LIN-35_L1_yale_stn_control_q30_Rep0.bam.unique.tagAlign.narrowPeak.gz
YL521_LIN-35_YA_yale_stn_GFP	LIN-35	YA	2267	spp.idrOptimal.bf.ce.YL521_LIN-35_YA_yale_stn_GFP_a_F_L_B_q30_Rep0.bam.unique.tagAlign_VS_YL521_LIN-35_YA_yale_stn_control_q30_Rep0.bam.unique.tagAlign.narrowPeak.gz
DCC4032_LIN-39_L1_modencode_stn_GFP	LIN-39	L1	1800	spp.idrOptimal.bf.ce.DCC4032_LIN-39_L1_modencode_stn_GFP_a_F_L_B_q30_Rep0.bam.unique.tagAlign_VS_DCC4032_LIN-39_L1_modencode_stn_control_q30_Rep0.bam.unique.tagAlign.narrowPeak.gz
OP18_LIN-39_L2_stanford_stn_GFP	LIN-39	L2	500	spp.idrOptimal.bf.ce.OP18_LIN-39_L2_stanford_stn_GFP_a_F_L_B_q30_Rep0.bam.unique.tagAlign_VS_OP18_LIN-39_L2_stanford_stn_control_q30_Rep0.bam.unique.tagAlign.narrowPeak.gz
OP367_LSY-2_EM_yale_stn_GFP	LSY-2	EM	3666	spp.idrOptimal.bf.ce.OP367_LSY-2_EM_yale_stn_GFP_a_F_L_B_q30_Rep0.bam.unique.tagAlign_VS_OP367_LSY-2_EM_yale_stn_control_q30_Rep0.bam.unique.tagAlign.narrowPeak.gz
OP367_LSY-2_L1_yale_stn_GFP	LSY-2	L1	6062	spp.idrOptimal.bf.ce.OP367_LSY-2_L1_yale_stn_GFP_a_F_L_B_q30_Rep0.bam.unique.tagAlign_VS_OP367_LSY-2_L1_yale_stn_control_q30_Rep0.bam.unique.tagAlign.narrowPeak.gz
OP240_LSY-2_L2_stanford_stn_GFP	LSY-2	L2	2304	spp.idrOptimal.bf.ce.OP240_LSY-2_L2_stanford_stn_GFP_a_F_L_B_q30_Rep0.bam.unique.tagAlign_VS_OP240_LSY-2_L2_stanford_stn_control_q30_Rep0.bam.unique.tagAlign.narrowPeak.gz
OP367_LSY-2_L2_yale_stn_GFP	LSY-2	L2	8468	spp.idrOptimal.bf.ce.OP367_LSY-2_L2_yale_stn_GFP_a_F_L_B_q30_Rep0.bam.unique.tagAlign_VS_OP367_LSY-2_L2_yale_stn_control_q30_Rep0.bam.unique.tagAlign.narrowPeak.gz
OP240_LSY-2_L4_stanford_stn_GFP	LSY-2	L4	1315	spp.idrOptimal.bf.ce.OP240_LSY-2_L4_stanford_stn_GFP_a_F_L_B_q30_Rep0.bam.unique.tagAlign_VS_OP240_LSY-2_L4_stanford_stn_control_q30_Rep0.bam.unique.tagAlign.narrowPeak.gz
OP367_LSY-2_L4_yale_stn_GFP	LSY-2	L4	7894	spp.idrOptimal.bf.ce.OP367_LSY-2_L4_yale_stn_GFP_a_F_L_B_q30_Rep0.bam.unique.tagAlign_VS_OP367_LSY-2_L4_yale_stn_control_q30_Rep0.bam.unique.tagAlign.narrowPeak.gz
OP367_LSY-2_S1_yale_stn_GFP	LSY-2	S1	9711	spp.idrOptimal.bf.ce.OP367_LSY-2_S1_yale_stn_GFP_a_F_L_B_q30_Rep0.bam.unique.tagAlign_VS_OP367_LSY-2_S1_yale_stn_control_q30_Rep0.bam.unique.tagAlign.narrowPeak.gz
OP27_MAB-5_EM_yale_stn_GFP	MAB-5	EM	644	spp.idrOptimal.bf.ce.OP27_MAB-5_EM_yale_stn_GFP_a_F_L_B_q30_Rep0.bam.unique.tagAlign_VS_OP27_MAB-5_EM_yale_stn_control_q30_Rep0.bam.unique.tagAlign.narrowPeak.gz
DCC4639_MAB-5_L2_modencode_stn_GFP	MAB-5	L2	3097	spp.idrOptimal.bf.ce.DCC4639_MAB-5_L2_modencode_stn_GFP_ab_F_L_B_q30_Rep0.bam.unique.tagAlign_VS_DCC4639_MAB-5_L2_modencode_stn_control_q30_Rep0.bam.unique.tagAlign.narrowPeak.gz
OP106_MDL-1_L1_yale_stn_GFP	MDL-1	L1	5245	spp.idrOptimal.bf.ce.OP106_MDL-1_L1_yale_stn_GFP_a_F_L_B_q30_Rep0.bam.unique.tagAlign_VS_OP106_MDL-1_L1_yale_stn_control_q30_Rep0.bam.unique.tagAlign.narrowPeak.gz
OP301_MEF-2_L1_yale_stn_GFP	MEF-2	L1	1198	spp.idrOptimal.bf.ce.OP301_MEF-2_L1_yale_stn_GFP_a_F_L_B_q30_Rep0.bam.unique.tagAlign_VS_OP301_MEF-2_L1_yale_stn_control_q30_Rep0.bam.unique.tagAlign.narrowPeak.gz
OP70_MEP-1_EM_yale_stn_GFP	MEP-1	EM	3447	spp.idrOptimal.bf.ce.OP70_MEP-1_EM_yale_stn_GFP_a_F_L_B_q30_Rep0.bam.unique.tagAlign_VS_OP70_MEP-1_EM_yale_stn_control_q30_Rep0.bam.unique.tagAlign.narrowPeak.gz
OP239_NHR-10_L2_stanford_stn_GFP	NHR-10	L2	397	spp.idrOptimal.bf.ce.OP239_NHR-10_L2_stanford_stn_GFP_a_F_L_B_q30_Rep0.bam.unique.tagAlign_VS_OP239_NHR-10_L2_stanford_stn_control_q30_Rep0.bam.unique.tagAlign.narrowPeak.gz
OP239_NHR-10_L4_stanford_stn_GFP	NHR-10	L4	967	spp.idrOptimal.bf.ce.OP239_NHR-10_L4_stanford_stn_GFP_a_F_L_B_q30_Rep0.bam.unique.tagAlign_VS_OP239_NHR-10_L4_stanford_stn_control_q30_Rep0.bam.unique.tagAlign.narrowPeak.gz
OP305_NHR-11_L1_stanford_stn_GFP	NHR-11	L1	1057	spp.idrOptimal.bf.ce.OP305_NHR-11_L1_stanford_stn_GFP_a_F_L_B_q30_Rep0.bam.unique.tagAlign_VS_OP305_NHR-11_L1_stanford_stn_control_q30_Rep0.bam.unique.tagAlign.narrowPeak.gz
OP305_NHR-11_L2_stanford_stn_GFP	NHR-11	L2	217	spp.idrOptimal.bf.ce.OP305_NHR-11_L2_stanford_stn_GFP_a_F_L_B_q30_Rep0.bam.unique.tagAlign_VS_OP305_NHR-11_L2_stanford_stn_control_q30_Rep0.bam.unique.tagAlign.narrowPeak.gz
OP305_NHR-11_L3_stanford_stn_GFP	NHR-11	L3	2367	spp.idrOptimal.bf.ce.OP305_NHR-11_L3_stanford_stn_GFP_a_F_L_B_q30_Rep0.bam.unique.tagAlign_VS_OP305_NHR-11_L3_stanford_stn_control_q30_Rep0.bam.unique.tagAlign.narrowPeak.gz
OP305_NHR-11_L4_stanford_stn_GFP	NHR-11	L4	2736	spp.idrOptimal.bf.ce.OP305_NHR-11_L4_stanford_stn_GFP_a_F_L_B_q30_Rep0.bam.unique.tagAlign_VS_OP305_NHR-11_L4_stanford_stn_control_q30_Rep0.bam.unique.tagAlign.narrowPeak.gz
OP339_NHR-129_L2_yale_stn_GFP	NHR-129	L2	7455	spp.idrOptimal.bf.ce.OP339_NHR-129_L2_yale_stn_GFP_a_F_L_B_q30_Rep0.bam.unique.tagAlign_VS_OP339_NHR-129_L2_yale_stn_control_q30_Rep0.bam.unique.tagAlign.narrowPeak.gz
DCC3859_NHR-2_EM_modencode_stn_GFP	NHR-2	EM	2299	spp.idrOptimal.bf.ce.DCC3859_NHR-2_EM_modencode_stn_GFP_a_F_L_B_q30_Rep0.bam.unique.tagAlign_VS_DCC3859_NHR-2_EM_modencode_stn_control_q30_Rep0.bam.unique.tagAlign.narrowPeak.gz
OP99_NHR-2_LE_stanford_stn_GFP	NHR-2	LE	2420	spp.idrOptimal.bf.ce.OP99_NHR-2_LE_stanford_stn_GFP_a_F_L_B_q30_Rep0.bam.unique.tagAlign_VS_OP99_NHR-2_LE_stanford_stn_control_q30_Rep0.bam.unique.tagAlign.narrowPeak.gz
OP361_NHR-21_L2_stanford_stn_GFP	NHR-21	L2	4255	spp.idrOptimal.bf.ce.OP361_NHR-21_L2_stanford_stn_GFP_a_F_L_B_q30_Rep0.bam.unique.tagAlign_VS_OP361_NHR-21_L2_stanford_stn_control_q30_Rep0.bam.unique.tagAlign.narrowPeak.gz
OP43_NHR-23_L3_yale_stn_GFP	NHR-23	L3	6176	spp.idrOptimal.bf.ce.OP43_NHR-23_L3_yale_stn_GFP_a_F_L_B_q30_Rep0.bam.unique.tagAlign_VS_OP43_NHR-23_L3_yale_stn_control_q30_Rep0.bam.unique.tagAlign.narrowPeak.gz
OP228_NHR-237_EM_stanford_stn_GFP	NHR-237	EM	1679	spp.idrOptimal.bf.ce.OP228_NHR-237_EM_stanford_stn_GFP_a_F_L_B_q30_Rep0.bam.unique.tagAlign_VS_OP228_NHR-237_EM_stanford_stn_control_q30_Rep0.bam.unique.tagAlign.narrowPeak.gz
OP228_NHR-237_L1_stanford_stn_GFP	NHR-237	L1	1118	spp.idrOptimal.bf.ce.OP228_NHR-237_L1_stanford_stn_GFP_a_F_L_B_q30_Rep0.bam.unique.tagAlign_VS_OP228_NHR-237_L1_stanford_stn_control_q30_Rep0.bam.unique.tagAlign.narrowPeak.gz
OP33_NHR-25_L2_yale_stn_GFP	NHR-25	L2	6019	spp.idrOptimal.bf.ce.OP33_NHR-25_L2_yale_stn_GFP_a_F_L_B_q30_Rep0.bam.unique.tagAlign_VS_OP33_NHR-25_L2_yale_stn_control_q30_Rep0.bam.unique.tagAlign.narrowPeak.gz
OP33_NHR-25_L3_stanford_stn_GFP	NHR-25	L3	5662	spp.idrOptimal.bf.ce.OP33_NHR-25_L3_stanford_stn_GFP_a_F_L_B_q30_Rep0.bam.unique.tagAlign_VS_OP33_NHR-25_L3_stanford_stn_control_q30_Rep0.bam.unique.tagAlign.narrowPeak.gz
OP317_NHR-28_L4_stanford_stn_GFP	NHR-28	L4	9550	spp.idrOptimal.bf.ce.OP317_NHR-28_L4_stanford_stn_GFP_a_F_L_B_q30_Rep0.bam.unique.tagAlign_VS_OP317_NHR-28_L4_stanford_stn_control_q30_Rep0.bam.unique.tagAlign.narrowPeak.gz
OP90_NHR-6_L2_yale_stn_GFP	NHR-6	L2	2789	spp.idrOptimal.bf.ce.OP90_NHR-6_L2_yale_stn_GFP_a_F_L_B_q30_Rep0.bam.unique.tagAlign_VS_OP90_NHR-6_L2_yale_stn_control_q30_Rep0.bam.unique.tagAlign.narrowPeak.gz
OP90_NHR-6_L4_yale_stn_GFP	NHR-6	L4	2707	spp.idrOptimal.bf.ce.OP90_NHR-6_L4_yale_stn_GFP_a_F_L_B_q30_Rep0.bam.unique.tagAlign_VS_OP90_NHR-6_L4_yale_stn_control_q30_Rep0.bam.unique.tagAlign.narrowPeak.gz
OP203_NHR-76_L4_stanford_stn_GFP	NHR-76	L4	542	spp.idrOptimal.bf.ce.OP203_NHR-76_L4_stanford_stn_GFP_a_F_L_B_q30_Rep0.bam.unique.tagAlign_VS_OP203_NHR-76_L4_stanford_stn_control_q30_Rep0.bam.unique.tagAlign.narrowPeak.gz
OP353_NHR-77_L1_stanford_stn_GFP	NHR-77	L1	2302	spp.idrOptimal.bf.ce.OP353_NHR-77_L1_stanford_stn_GFP_a_F_L_B_q30_Rep0.bam.unique.tagAlign_VS_OP353_NHR-77_L1_stanford_stn_control_q30_Rep0.bam.unique.tagAlign.narrowPeak.gz
OP353_NHR-77_L2_stanford_stn_GFP	NHR-77	L2	534	spp.idrOptimal.bf.ce.OP353_NHR-77_L2_stanford_stn_GFP_a_F_L_B_q30_Rep0.bam.unique.tagAlign_VS_OP353_NHR-77_L2_stanford_stn_control_q30_Rep0.bam.unique.tagAlign.narrowPeak.gz
OP353_NHR-77_L3_stanford_stn_GFP	NHR-77	L3	805	spp.idrOptimal.bf.ce.OP353_NHR-77_L3_stanford_stn_GFP_a_F_L_B_q30_Rep0.bam.unique.tagAlign_VS_OP353_NHR-77_L3_stanford_stn_control_q30_Rep0.bam.unique.tagAlign.narrowPeak.gz
OP353_NHR-77_L4_stanford_stn_GFP	NHR-77	L4	4664	spp.idrOptimal.bf.ce.OP353_NHR-77_L4_stanford_stn_GFP_a_F_L_B_q30_Rep0.bam.unique.tagAlign_VS_OP353_NHR-77_L4_stanford_stn_control_q30_Rep0.bam.unique.tagAlign.narrowPeak.gz
DCC3856_PAX-1_EM_modencode_stn_GFP	PAX-1	EM	916	spp.idrOptimal.bf.ce.DCC3856_PAX-1_EM_modencode_stn_GFP_a_F_L_B_q30_Rep0.bam.unique.tagAlign_VS_DCC3856_PAX-1_EM_modencode_stn_control_q30_Rep0.bam.unique.tagAlign.narrowPeak.gz
OP117_PAX-1_LE_stanford_stn_GFP	PAX-1	LE	935	spp.idrOptimal.bf.ce.OP117_PAX-1_LE_stanford_stn_GFP_a_F_L_B_q30_Rep0.bam.unique.tagAlign_VS_OP117_PAX-1_LE_stanford_stn_control_q30_Rep0.bam.unique.tagAlign.narrowPeak.gz
OP86_PEB-1_L2_stanford_stn_GFP	PEB-1	L2	182	spp.idrOptimal.bf.ce.OP86_PEB-1_L2_stanford_stn_GFP_a_F_L_B_q30_Rep0.bam.unique.tagAlign_VS_OP86_PEB-1_L2_stanford_stn_control_q30_Rep0.bam.unique.tagAlign.narrowPeak.gz
OP87_PES-1_L4_yale_stn_GFP	PES-1	L4	3535	spp.idrOptimal.bf.ce.OP87_PES-1_L4_yale_stn_GFP_ab_F_L_B_q30_Rep0.bam.unique.tagAlign_VS_OP87_PES-1_L4_yale_stn_control_q30_Rep0.bam.unique.tagAlign.narrowPeak.gz
OP37_PHA-4_L3_yale_stn_GFP	PHA-4	L3	11200	spp.idrOptimal.bf.ce.OP37_PHA-4_L3_yale_stn_GFP_a_F_L_B_q30_Rep0.bam.unique.tagAlign_VS_OP37_PHA-4_L3_yale_stn_control_q30_Rep0.bam.unique.tagAlign.narrowPeak.gz
DCC4033_PHA-4_L4_modencode_stn_GFP	PHA-4	L4	2398	spp.idrOptimal.bf.ce.DCC4033_PHA-4_L4_modencode_stn_GFP_a_F_L_B_q30_Rep0.bam.unique.tagAlign_VS_DCC4033_PHA-4_L4_modencode_stn_control_q30_Rep0.bam.unique.tagAlign.narrowPeak.gz
OP37_PHA-4_L4_yale_stn_GFP	PHA-4	L4	2202	spp.idrOptimal.bf.ce.OP37_PHA-4_L4_yale_stn_GFP_a_F_L_B_q30_Rep0.bam.unique.tagAlign_VS_OP37_PHA-4_L4_yale_stn_control_q30_Rep0.bam.unique.tagAlign.narrowPeak.gz
OP201_PQM-1_L1_stanford_stn_GFP	PQM-1	L1	606	spp.idrOptimal.bf.ce.OP201_PQM-1_L1_stanford_stn_GFP_b_F_L_B_q30_Rep0.bam.unique.tagAlign_VS_OP201_PQM-1_L1_stanford_stn_control_q30_Rep0.bam.unique.tagAlign.narrowPeak.gz
OP201_PQM-1_L3_stanford_stn_GFP	PQM-1	L3	4223	spp.idrOptimal.bf.ce.OP201_PQM-1_L3_stanford_stn_GFP_a_F_L_B_q30_Rep0.bam.unique.tagAlign_VS_OP201_PQM-1_L3_stanford_stn_control_q30_Rep0.bam.unique.tagAlign.narrowPeak.gz
OP201_PQM-1_L3_yale_stn_GFP	PQM-1	L3	6296	spp.idrOptimal.bf.ce.OP201_PQM-1_L3_yale_stn_GFP_ab_F_L_B_q30_Rep0.bam.unique.tagAlign_VS_OP201_PQM-1_L3_yale_stn_control_q30_Rep0.bam.unique.tagAlign.narrowPeak.gz
OP201_PQM-1_L4_stanford_stn_GFP	PQM-1	L4	5535	spp.idrOptimal.bf.ce.OP201_PQM-1_L4_stanford_stn_GFP_ab_F_L_B_q30_Rep0.bam.unique.tagAlign_VS_OP201_PQM-1_L4_stanford_stn_control_q30_Rep0.bam.unique.tagAlign.narrowPeak.gz
OP218_R02D3.7_L2_stanford_stn_GFP	R02D3.7	L2	586	spp.idrOptimal.bf.ce.OP218_R02D3.7_L2_stanford_stn_GFP_a_F_L_B_q30_Rep0.bam.unique.tagAlign_VS_OP218_R02D3.7_L2_stanford_stn_control_q30_Rep0.bam.unique.tagAlign.narrowPeak.gz
OP218_R02D3.7_L3_stanford_stn_GFP	R02D3.7	L3	2078	spp.idrOptimal.bf.ce.OP218_R02D3.7_L3_stanford_stn_GFP_a_F_L_B_q30_Rep0.bam.unique.tagAlign_VS_OP218_R02D3.7_L3_stanford_stn_control_q30_Rep0.bam.unique.tagAlign.narrowPeak.gz
OP218_R02D3.7_L4_stanford_stn_GFP	R02D3.7	L4	436	spp.idrOptimal.bf.ce.OP218_R02D3.7_L4_stanford_stn_GFP_a_F_L_B_q30_Rep0.bam.unique.tagAlign_VS_OP218_R02D3.7_L4_stanford_stn_control_q30_Rep0.bam.unique.tagAlign.narrowPeak.gz
YL517_RPC-15_YA_yale_stn_GFP	RPC-15	YA	2732	spp.idrOptimal.bf.ce.YL517_RPC-15_YA_yale_stn_GFP_a_F_L_B_q30_Rep0.bam.unique.tagAlign_VS_YL517_RPC-15_YA_yale_stn_control_q30_Rep0.bam.unique.tagAlign.narrowPeak.gz
OP355_SAX-3_L2_stanford_ff4_GFP	SAX-3	L2	1202	spp.idrOptimal.bf.ce.OP355_SAX-3_L2_stanford_ff4_GFP_a_F_L_B_q30_Rep0.bam.unique.tagAlign_VS_OP355_SAX-3_L2_stanford_ff4_control_q30_Rep0.bam.unique.tagAlign.narrowPeak.gz
OP355_SAX-3_L2_stanford_stn_GFP	SAX-3	L2	2764	spp.idrOptimal.bf.ce.OP355_SAX-3_L2_stanford_stn_GFP_a_F_L_B_q30_Rep0.bam.unique.tagAlign_VS_OP355_SAX-3_L2_stanford_stn_control_q30_Rep0.bam.unique.tagAlign.narrowPeak.gz
OP355_SAX-3_L3_stanford_stn_GFP	SAX-3	L3	1354	spp.idrOptimal.bf.ce.OP355_SAX-3_L3_stanford_stn_GFP_a_F_L_B_q30_Rep0.bam.unique.tagAlign_VS_OP355_SAX-3_L3_stanford_stn_control_q30_Rep0.bam.unique.tagAlign.narrowPeak.gz
OP355_SAX-3_L4_stanford_ff4_GFP	SAX-3	L4	1425	spp.idrOptimal.bf.ce.OP355_SAX-3_L4_stanford_ff4_GFP_a_F_L_B_q30_Rep0.bam.unique.tagAlign_VS_OP355_SAX-3_L4_stanford_ff4_control_q30_Rep0.bam.unique.tagAlign.narrowPeak.gz
OP355_SAX-3_L4_stanford_stn_GFP	SAX-3	L4	4899	spp.idrOptimal.bf.ce.OP355_SAX-3_L4_stanford_stn_GFP_a_F_L_B_q30_Rep0.bam.unique.tagAlign_VS_OP355_SAX-3_L4_stanford_stn_control_q30_Rep0.bam.unique.tagAlign.narrowPeak.gz
OP57_SEM-4_L2_yale_stn_GFP	SEM-4	L2	3671	spp.idrOptimal.bf.ce.OP57_SEM-4_L2_yale_stn_GFP_a_F_L_B_q30_Rep0.bam.unique.tagAlign_VS_OP57_SEM-4_L2_yale_stn_control_q30_Rep0.bam.unique.tagAlign.narrowPeak.gz
OP178_SKN-1_L1_yale_stn_GFP	SKN-1	L1	4039	spp.idrOptimal.bf.ce.OP178_SKN-1_L1_yale_stn_GFP_a_F_L_B_q30_Rep0.bam.unique.tagAlign_VS_OP178_SKN-1_L1_yale_stn_control_q30_Rep0.bam.unique.tagAlign.narrowPeak.gz
OP178_SKN-1_L2_yale_stn_GFP	SKN-1	L2	872	spp.idrOptimal.bf.ce.OP178_SKN-1_L2_yale_stn_GFP_a_F_L_B_q30_Rep0.bam.unique.tagAlign_VS_OP178_SKN-1_L2_yale_stn_control_q30_Rep0.bam.unique.tagAlign.narrowPeak.gz
OP342_SKN-1_L3_yale_stn_GFP	SKN-1	L3	1797	spp.idrOptimal.bf.ce.OP342_SKN-1_L3_yale_stn_GFP_ab_F_L_B_q30_Rep0.bam.unique.tagAlign_VS_OP342_SKN-1_L3_yale_stn_control_q30_Rep0.bam.unique.tagAlign.narrowPeak.gz
OP77_UNC-130_L1_yale_stn_GFP	UNC-130	L1	3591	spp.idrOptimal.bf.ce.OP77_UNC-130_L1_yale_stn_GFP_a_F_L_B_q30_Rep0.bam.unique.tagAlign_VS_OP77_UNC-130_L1_yale_stn_control_q30_Rep0.bam.unique.tagAlign.narrowPeak.gz
OP186_UNC-39_EM_stanford_stn_GFP	UNC-39	EM	355	spp.idrOptimal.bf.ce.OP186_UNC-39_EM_stanford_stn_GFP_a_F_L_B_q30_Rep0.bam.unique.tagAlign_VS_OP186_UNC-39_EM_stanford_stn_control_q30_Rep0.bam.unique.tagAlign.narrowPeak.gz
DCC4035_UNC-55_L2_modencode_stn_GFP	UNC-55	L2	7384	spp.idrOptimal.bf.ce.DCC4035_UNC-55_L2_modencode_stn_GFP_a_F_L_B_q30_Rep0.bam.unique.tagAlign_VS_DCC4035_UNC-55_L2_modencode_stn_control_q30_Rep0.bam.unique.tagAlign.narrowPeak.gz
OP600_UNC-62_D4_stanford_stn_GFP	UNC-62	D4	1012	spp.idrOptimal.bf.ce.OP600_UNC-62_D4_stanford_stn_GFP_a_F_L_B_q30_Rep0.bam.unique.tagAlign_VS_OP600_UNC-62_D4_stanford_stn_control_q30_Rep0.bam.unique.tagAlign.narrowPeak.gz
OP600_UNC-62_EM_stanford_stn_GFP	UNC-62	EM	3183	spp.idrOptimal.bf.ce.OP600_UNC-62_EM_stanford_stn_GFP_a_F_L_B_q30_Rep0.bam.unique.tagAlign_VS_OP600_UNC-62_EM_stanford_stn_control_q30_Rep0.bam.unique.tagAlign.narrowPeak.gz
OP600_UNC-62_L3_stanford_stn_GFP	UNC-62	L3	894	spp.idrOptimal.bf.ce.OP600_UNC-62_L3_stanford_stn_GFP_a_F_L_B_q30_Rep0.bam.unique.tagAlign_VS_OP600_UNC-62_L3_stanford_stn_control_q30_Rep0.bam.unique.tagAlign.narrowPeak.gz
OP600_UNC-62_L4_stanford_stn_GFP	UNC-62	L4	3562	spp.idrOptimal.bf.ce.OP600_UNC-62_L4_stanford_stn_GFP_a_F_L_B_q30_Rep0.bam.unique.tagAlign_VS_OP600_UNC-62_L4_stanford_stn_control_q30_Rep0.bam.unique.tagAlign.narrowPeak.gz
OP600_UNC-62_LE_stanford_son_GFP	UNC-62	LE	3450	spp.idrOptimal.bf.ce.OP600_UNC-62_LE_stanford_son_GFP_a_F_L_B_q30_Rep0.bam.unique.tagAlign_VS_OP600_UNC-62_LE_stanford_son_control_q30_Rep0.bam.unique.tagAlign.narrowPeak.gz
OP215_W03F9.2_LY_yale_stn_GFP	W03F9.2	LY	3508	spp.idrOptimal.bf.ce.OP215_W03F9.2_LY_yale_stn_GFP_a_F_L_B_q30_Rep0.bam.unique.tagAlign_VS_OP215_W03F9.2_LY_yale_stn_control_q30_Rep0.bam.unique.tagAlign.narrowPeak.gz
DCC3217_W03F9.2_YA_modencode_stn_GFP	W03F9.2	YA	3602	spp.idrOptimal.bf.ce.DCC3217_W03F9.2_YA_modencode_stn_GFP_a_F_L_B_q30_Rep0.bam.unique.tagAlign_VS_DCC3217_W03F9.2_YA_modencode_stn_control_q30_Rep0.bam.unique.tagAlign.narrowPeak.gz
OP83_ZAG-1_L1_stanford_stn_GFP	ZAG-1	L1	557	spp.idrOptimal.bf.ce.OP83_ZAG-1_L1_stanford_stn_GFP_a_F_L_B_q30_Rep0.bam.unique.tagAlign_VS_OP83_ZAG-1_L1_stanford_stn_control_q30_Rep0.bam.unique.tagAlign.narrowPeak.gz
OP83_ZAG-1_L2_stanford_stn_GFP	ZAG-1	L2	2233	spp.idrOptimal.bf.ce.OP83_ZAG-1_L2_stanford_stn_GFP_a_F_L_B_q30_Rep0.bam.unique.tagAlign_VS_OP83_ZAG-1_L2_stanford_stn_control_q30_Rep0.bam.unique.tagAlign.narrowPeak.gz
OP83_ZAG-1_L3_stanford_stn_GFP	ZAG-1	L3	314	spp.idrOptimal.bf.ce.OP83_ZAG-1_L3_stanford_stn_GFP_a_F_L_B_q30_Rep0.bam.unique.tagAlign_VS_OP83_ZAG-1_L3_stanford_stn_control_q30_Rep0.bam.unique.tagAlign.narrowPeak.gz
OP83_ZAG-1_L4_stanford_stn_GFP	ZAG-1	L4	301	spp.idrOptimal.bf.ce.OP83_ZAG-1_L4_stanford_stn_GFP_a_F_L_B_q30_Rep0.bam.unique.tagAlign_VS_OP83_ZAG-1_L4_stanford_stn_control_q30_Rep0.bam.unique.tagAlign.narrowPeak.gz
OP432_ZIP-2_L4_stanford_stn_GFP	ZIP-2	L4	767	spp.idrOptimal.bf.ce.OP432_ZIP-2_L4_stanford_stn_GFP_a_F_L_B_q30_Rep0.bam.unique.tagAlign_VS_OP432_ZIP-2_L4_stanford_stn_control_q30_Rep0.bam.unique.tagAlign.narrowPeak.gz
OP231_ZK546.5_L2_stanford_stn_GFP	ZK546.5	L2	548	spp.idrOptimal.bf.ce.OP231_ZK546.5_L2_stanford_stn_GFP_a_F_L_B_q30_Rep0.bam.unique.tagAlign_VS_OP231_ZK546.5_L2_stanford_stn_control_q30_Rep0.bam.unique.tagAlign.narrowPeak.gz
OP231_ZK546.5_L3_stanford_stn_GFP	ZK546.5	L3	334	spp.idrOptimal.bf.ce.OP231_ZK546.5_L3_stanford_stn_GFP_a_F_L_B_q30_Rep0.bam.unique.tagAlign_VS_OP231_ZK546.5_L3_stanford_stn_control_q30_Rep0.bam.unique.tagAlign.narrowPeak.gz
OP231_ZK546.5_L4_stanford_stn_GFP	ZK546.5	L4	405	spp.idrOptimal.bf.ce.OP231_ZK546.5_L4_stanford_stn_GFP_a_F_L_B_q30_Rep0.bam.unique.tagAlign_VS_OP231_ZK546.5_L4_stanford_stn_control_q30_Rep0.bam.unique.tagAlign.narrowPeak.gz
OP236_ZTF-11_EM_stanford_stn_GFP	ZTF-11	EM	752	spp.idrOptimal.bf.ce.OP236_ZTF-11_EM_stanford_stn_GFP_a_F_L_B_q30_Rep0.bam.unique.tagAlign_VS_OP236_ZTF-11_EM_stanford_stn_control_q30_Rep0.bam.unique.tagAlign.narrowPeak.gz
OP322_ZTF-4_L1_stanford_stn_GFP	ZTF-4	L1	1729	spp.idrOptimal.bf.ce.OP322_ZTF-4_L1_stanford_stn_GFP_a_F_L_B_q30_Rep0.bam.unique.tagAlign_VS_OP322_ZTF-4_L1_stanford_stn_control_q30_Rep0.bam.unique.tagAlign.narrowPeak.gz
OP322_ZTF-4_L2_stanford_stn_GFP	ZTF-4	L2	2116	spp.idrOptimal.bf.ce.OP322_ZTF-4_L2_stanford_stn_GFP_a_F_L_B_q30_Rep0.bam.unique.tagAlign_VS_OP322_ZTF-4_L2_stanford_stn_control_q30_Rep0.bam.unique.tagAlign.narrowPeak.gz
OP322_ZTF-4_L3_yale_stn_GFP	ZTF-4	L3	1082	spp.idrOptimal.bf.ce.OP322_ZTF-4_L3_yale_stn_GFP_a_F_L_B_q30_Rep0.bam.unique.tagAlign_VS_OP322_ZTF-4_L3_yale_stn_control_q30_Rep0.bam.unique.tagAlign.narrowPeak.gz
OP332_ZTF-7_L4_yale_stn_GFP	ZTF-7	L4	3303	spp.idrOptimal.bf.ce.OP332_ZTF-7_L4_yale_stn_GFP_a_F_L_B_q30_Rep0.bam.unique.tagAlign_VS_OP332_ZTF-7_L4_yale_stn_control_q30_Rep0.bam.unique.tagAlign.narrowPeak.gz
OP217_ALY-2_L2_stanford_stn_GFP	ALY-2	L2	147	spp.idrOptimal.bf.ce.OP217_ALY-2_L2_stanford_stn_GFP_a_F_L_B_q30_Rep0.bam.unique.tagAlign_VS_OP217_ALY-2_L2_stanford_stn_control_q30_Rep0.bam.unique.tagAlign.narrowPeak.gz
OP217_ALY-2_L3_stanford_stn_GFP	ALY-2	L3	319	spp.idrOptimal.bf.ce.OP217_ALY-2_L3_stanford_stn_GFP_a_F_L_B_q30_Rep0.bam.unique.tagAlign_VS_OP217_ALY-2_L3_stanford_stn_control_q30_Rep0.bam.unique.tagAlign.narrowPeak.gz
OP217_ALY-2_L4_stanford_stn_GFP	ALY-2	L4	157	spp.idrOptimal.bf.ce.OP217_ALY-2_L4_stanford_stn_GFP_a_F_L_B_q30_Rep0.bam.unique.tagAlign_VS_OP217_ALY-2_L4_stanford_stn_control_q30_Rep0.bam.unique.tagAlign.narrowPeak.gz
OP219_C05D10.1_L4_stanford_stn_GFP	C05D10.1	L4	304	spp.idrOptimal.bf.ce.OP219_C05D10.1_L4_stanford_stn_GFP_a_F_L_B_q30_Rep0.bam.unique.tagAlign_VS_OP219_C05D10.1_L4_stanford_stn_control_q30_Rep0.bam.unique.tagAlign.narrowPeak.gz
OP389_CEH-22_LE_stanford_stn_GFP	CEH-22	LE	355	spp.idrOptimal.bf.ce.OP389_CEH-22_LE_stanford_stn_GFP_a_F_L_B_q30_Rep0.bam.unique.tagAlign_VS_OP389_CEH-22_LE_stanford_stn_control_q30_Rep0.bam.unique.tagAlign.narrowPeak.gz
OP202_CEH-9_L3_stanford_stn_GFP	CEH-9	L3	258	spp.idrOptimal.bf.ce.OP202_CEH-9_L3_stanford_stn_GFP_b_F_L_B_q30_Rep0.bam.unique.tagAlign_VS_OP202_CEH-9_L3_stanford_stn_control_q30_Rep0.bam.unique.tagAlign.narrowPeak.gz
OP222_DAF-12_L3_stanford_stn_GFP	DAF-12	L3	112	spp.idrOptimal.bf.ce.OP222_DAF-12_L3_stanford_stn_GFP_a_F_L_B_q30_Rep0.bam.unique.tagAlign_VS_OP222_DAF-12_L3_stanford_stn_control_q30_Rep0.bam.unique.tagAlign.narrowPeak.gz
OP418_DMD-4_L2_stanford_stn_GFP	DMD-4	L2	364	spp.idrOptimal.bf.ce.OP418_DMD-4_L2_stanford_stn_GFP_a_F_L_B_q30_Rep0.bam.unique.tagAlign_VS_OP418_DMD-4_L2_stanford_stn_control_q30_Rep0.bam.unique.tagAlign.narrowPeak.gz
DCC3159_EGL-5_L3_modencode_stn_GFP	EGL-5	L3	1277	spp.idrOptimal.bf.ce.DCC3159_EGL-5_L3_modencode_stn_GFP_ab_F_L_B_q30_Rep0.bam.unique.tagAlign_VS_DCC3159_EGL-5_L3_modencode_stn_control_q30_Rep0.bam.unique.tagAlign.narrowPeak.gz
OP354_ELT-1_L2_stanford_stn_GFP	ELT-1	L2	327	spp.idrOptimal.bf.ce.OP354_ELT-1_L2_stanford_stn_GFP_a_F_L_B_q30_Rep0.bam.unique.tagAlign_VS_OP354_ELT-1_L2_stanford_stn_control_q30_Rep0.bam.unique.tagAlign.narrowPeak.gz
OP75_ELT-3_L1_stanford_ff4_GFP	ELT-3	L1	2170	spp.idrOptimal.bf.ce.OP75_ELT-3_L1_stanford_ff4_GFP_a_F_L_B_q30_Rep0.bam.unique.tagAlign_VS_OP75_ELT-3_L1_stanford_ff4_control_q30_Rep0.bam.unique.tagAlign.narrowPeak.gz
OP75_ELT-3_L2_stanford_ff4_GFP	ELT-3	L2	177	spp.idrOptimal.bf.ce.OP75_ELT-3_L2_stanford_ff4_GFP_a_F_L_B_q30_Rep0.bam.unique.tagAlign_VS_OP75_ELT-3_L2_stanford_ff4_control_q30_Rep0.bam.unique.tagAlign.narrowPeak.gz
OP212_F45C12.2_L4_stanford_stn_GFP	F45C12.2	L4	138	spp.idrOptimal.bf.ce.OP212_F45C12.2_L4_stanford_stn_GFP_ab_F_L_B_q30_Rep0.bam.unique.tagAlign_VS_OP212_F45C12.2_L4_stanford_stn_control_q30_Rep0.bam.unique.tagAlign.narrowPeak.gz
DCC4028_FKH-10_L4_modencode_stn_GFP	FKH-10	L4	212	spp.idrOptimal.bf.ce.DCC4028_FKH-10_L4_modencode_stn_GFP_a_F_L_B_q30_Rep0.bam.unique.tagAlign_VS_DCC4028_FKH-10_L4_modencode_stn_control_q30_Rep0.bam.unique.tagAlign.narrowPeak.gz
OP337_FKH-10_LE_stanford_stn_GFP	FKH-10	LE	287	spp.idrOptimal.bf.ce.OP337_FKH-10_LE_stanford_stn_GFP_a_F_L_B_q30_Rep0.bam.unique.tagAlign_VS_OP337_FKH-10_LE_stanford_stn_control_q30_Rep0.bam.unique.tagAlign.narrowPeak.gz
OP304_FOS-1_L4_stanford_stn_GFP	FOS-1	L4	191	spp.idrOptimal.bf.ce.OP304_FOS-1_L4_stanford_stn_GFP_a_F_L_B_q30_Rep0.bam.unique.tagAlign_VS_OP304_FOS-1_L4_stanford_stn_control_q30_Rep0.bam.unique.tagAlign.narrowPeak.gz
DCC4641_HPL-2_YA_modencode_stn_GFP	HPL-2	YA	328	spp.idrOptimal.bf.ce.DCC4641_HPL-2_YA_modencode_stn_GFP_a_F_L_B_q30_Rep0.bam.unique.tagAlign_VS_DCC4641_HPL-2_YA_modencode_stn_control_q30_Rep0.bam.unique.tagAlign.narrowPeak.gz
YL402_LIN-35_YA_yale_stn_GFP	LIN-35	YA	407	spp.idrOptimal.bf.ce.YL402_LIN-35_YA_yale_stn_GFP_ab_F_L_B_q30_Rep0.bam.unique.tagAlign_VS_YL402_LIN-35_YA_yale_stn_control_q30_Rep0.bam.unique.tagAlign.narrowPeak.gz
YL468_LIN-35_YA_yale_stn_GFP	LIN-35	YA	543	spp.idrOptimal.bf.ce.YL468_LIN-35_YA_yale_stn_GFP_a_F_L_B_q30_Rep0.bam.unique.tagAlign_VS_YL468_LIN-35_YA_yale_stn_control_q30_Rep0.bam.unique.tagAlign.narrowPeak.gz
OP18_LIN-39_L4_stanford_stn_GFP	LIN-39	L4	141	spp.idrOptimal.bf.ce.OP18_LIN-39_L4_stanford_stn_GFP_a_F_L_B_q30_Rep0.bam.unique.tagAlign_VS_OP18_LIN-39_L4_stanford_stn_control_q30_Rep0.bam.unique.tagAlign.narrowPeak.gz
OP427_MBF-1_L2_stanford_stn_GFP	MBF-1	L2	122	spp.idrOptimal.bf.ce.OP427_MBF-1_L2_stanford_stn_GFP_a_F_L_B_q30_Rep0.bam.unique.tagAlign_VS_OP427_MBF-1_L2_stanford_stn_control_q30_Rep0.bam.unique.tagAlign.narrowPeak.gz
OP198_MML-1_L3_stanford_stn_GFP	MML-1	L3	188	spp.idrOptimal.bf.ce.OP198_MML-1_L3_stanford_stn_GFP_a_F_L_B_q30_Rep0.bam.unique.tagAlign_VS_OP198_MML-1_L3_stanford_stn_control_q30_Rep0.bam.unique.tagAlign.narrowPeak.gz
OP305_NHR-11_LE_stanford_stn_GFP	NHR-11	LE	184	spp.idrOptimal.bf.ce.OP305_NHR-11_LE_stanford_stn_GFP_a_F_L_B_q30_Rep0.bam.unique.tagAlign_VS_OP305_NHR-11_LE_stanford_stn_control_q30_Rep0.bam.unique.tagAlign.narrowPeak.gz
OP318_NHR-12_EM_stanford_stn_GFP	NHR-12	EM	277	spp.idrOptimal.bf.ce.OP318_NHR-12_EM_stanford_stn_GFP_a_F_L_B_q30_Rep0.bam.unique.tagAlign_VS_OP318_NHR-12_EM_stanford_stn_control_q30_Rep0.bam.unique.tagAlign.narrowPeak.gz
OP318_NHR-12_L1_stanford_stn_GFP	NHR-12	L1	145	spp.idrOptimal.bf.ce.OP318_NHR-12_L1_stanford_stn_GFP_a_F_L_B_q30_Rep0.bam.unique.tagAlign_VS_OP318_NHR-12_L1_stanford_stn_control_q30_Rep0.bam.unique.tagAlign.narrowPeak.gz
OP318_NHR-12_L2_yale_stn_GFP	NHR-12	L2	197	spp.idrOptimal.bf.ce.OP318_NHR-12_L2_yale_stn_GFP_a_F_L_B_q30_Rep0.bam.unique.tagAlign_VS_OP318_NHR-12_L2_yale_stn_control_q30_Rep0.bam.unique.tagAlign.narrowPeak.gz
OP318_NHR-12_L3_stanford_stn_GFP	NHR-12	L3	79	spp.idrOptimal.bf.ce.OP318_NHR-12_L3_stanford_stn_GFP_a_F_L_B_q30_Rep0.bam.unique.tagAlign_VS_OP318_NHR-12_L3_stanford_stn_control_q30_Rep0.bam.unique.tagAlign.narrowPeak.gz
OP318_NHR-12_L4_stanford_stn_GFP	NHR-12	L4	196	spp.idrOptimal.bf.ce.OP318_NHR-12_L4_stanford_stn_GFP_a_F_L_B_q30_Rep0.bam.unique.tagAlign_VS_OP318_NHR-12_L4_stanford_stn_control_q30_Rep0.bam.unique.tagAlign.narrowPeak.gz
OP43_NHR-23_L2_stanford_stn_GFP	NHR-23	L2	132	spp.idrOptimal.bf.ce.OP43_NHR-23_L2_stanford_stn_GFP_a_F_L_B_q30_Rep0.bam.unique.tagAlign_VS_OP43_NHR-23_L2_stanford_stn_control_q30_Rep0.bam.unique.tagAlign.narrowPeak.gz
OP228_NHR-237_L2_stanford_stn_GFP	NHR-237	L2	322	spp.idrOptimal.bf.ce.OP228_NHR-237_L2_stanford_stn_GFP_a_F_L_B_q30_Rep0.bam.unique.tagAlign_VS_OP228_NHR-237_L2_stanford_stn_control_q30_Rep0.bam.unique.tagAlign.narrowPeak.gz
OP228_NHR-237_L3_stanford_stn_GFP	NHR-237	L3	89	spp.idrOptimal.bf.ce.OP228_NHR-237_L3_stanford_stn_GFP_a_F_L_B_q30_Rep0.bam.unique.tagAlign_VS_OP228_NHR-237_L3_stanford_stn_control_q30_Rep0.bam.unique.tagAlign.narrowPeak.gz
OP228_NHR-237_L4_stanford_stn_GFP	NHR-237	L4	245	spp.idrOptimal.bf.ce.OP228_NHR-237_L4_stanford_stn_GFP_a_F_L_B_q30_Rep0.bam.unique.tagAlign_VS_OP228_NHR-237_L4_stanford_stn_control_q30_Rep0.bam.unique.tagAlign.narrowPeak.gz
OP317_NHR-28_EM_stanford_stn_GFP	NHR-28	EM	442	spp.idrOptimal.bf.ce.OP317_NHR-28_EM_stanford_stn_GFP_a_F_L_B_q30_Rep0.bam.unique.tagAlign_VS_OP317_NHR-28_EM_stanford_stn_control_q30_Rep0.bam.unique.tagAlign.narrowPeak.gz
OP317_NHR-28_L1_stanford_stn_GFP	NHR-28	L1	248	spp.idrOptimal.bf.ce.OP317_NHR-28_L1_stanford_stn_GFP_a_F_L_B_q30_Rep0.bam.unique.tagAlign_VS_OP317_NHR-28_L1_stanford_stn_control_q30_Rep0.bam.unique.tagAlign.narrowPeak.gz
OP317_NHR-28_L3_stanford_stn_GFP	NHR-28	L3	150	spp.idrOptimal.bf.ce.OP317_NHR-28_L3_stanford_stn_GFP_a_F_L_B_q30_Rep0.bam.unique.tagAlign_VS_OP317_NHR-28_L3_stanford_stn_control_q30_Rep0.bam.unique.tagAlign.narrowPeak.gz
DCC4031_NHR-67_L3_modencode_stn_GFP	NHR-67	L3	110	spp.idrOptimal.bf.ce.DCC4031_NHR-67_L3_modencode_stn_GFP_a_F_L_B_q30_Rep0.bam.unique.tagAlign_VS_DCC4031_NHR-67_L3_modencode_stn_control_q30_Rep0.bam.unique.tagAlign.narrowPeak.gz
OP203_NHR-76_EM_stanford_stn_GFP	NHR-76	EM	177	spp.idrOptimal.bf.ce.OP203_NHR-76_EM_stanford_stn_GFP_a_F_L_B_q30_Rep0.bam.unique.tagAlign_VS_OP203_NHR-76_EM_stanford_stn_control_q30_Rep0.bam.unique.tagAlign.narrowPeak.gz
OP203_NHR-76_L1_stanford_stn_GFP	NHR-76	L1	325	spp.idrOptimal.bf.ce.OP203_NHR-76_L1_stanford_stn_GFP_a_F_L_B_q30_Rep0.bam.unique.tagAlign_VS_OP203_NHR-76_L1_stanford_stn_control_q30_Rep0.bam.unique.tagAlign.narrowPeak.gz
OP203_NHR-76_L3_stanford_stn_GFP	NHR-76	L3	133	spp.idrOptimal.bf.ce.OP203_NHR-76_L3_stanford_stn_GFP_ab_F_L_B_q30_Rep0.bam.unique.tagAlign_VS_OP203_NHR-76_L3_stanford_stn_control_q30_Rep0.bam.unique.tagAlign.narrowPeak.gz
OP357_NHR-84_L1_stanford_stn_GFP	NHR-84	L1	173	spp.idrOptimal.bf.ce.OP357_NHR-84_L1_stanford_stn_GFP_a_F_L_B_q30_Rep0.bam.unique.tagAlign_VS_OP357_NHR-84_L1_stanford_stn_control_q30_Rep0.bam.unique.tagAlign.narrowPeak.gz
OP37_PHA-4_YA_yale_stn_GFP	PHA-4	YA	621	spp.idrOptimal.bf.ce.OP37_PHA-4_YA_yale_stn_GFP_a_F_L_B_q30_Rep0.bam.unique.tagAlign_VS_OP37_PHA-4_YA_yale_stn_control_q30_Rep0.bam.unique.tagAlign.narrowPeak.gz
OP416_R0GF6.6_L4_stanford_stn_GFP	R0GF6.6	L4	108	spp.idrOptimal.bf.ce.OP416_R0GF6.6_L4_stanford_stn_GFP_a_F_L_B_q30_Rep0.bam.unique.tagAlign_VS_OP416_R0GF6.6_L4_stanford_stn_control_q30_Rep0.bam.unique.tagAlign.narrowPeak.gz
OP355_SAX-3_L1_stanford_stn_GFP	SAX-3	L1	240	spp.idrOptimal.bf.ce.OP355_SAX-3_L1_stanford_stn_GFP_a_F_L_B_q30_Rep0.bam.unique.tagAlign_VS_OP355_SAX-3_L1_stanford_stn_control_q30_Rep0.bam.unique.tagAlign.narrowPeak.gz
OP193_SEA-2_L3_stanford_stn_GFP	SEA-2	L3	373	spp.idrOptimal.bf.ce.OP193_SEA-2_L3_stanford_stn_GFP_b_F_L_B_q30_Rep0.bam.unique.tagAlign_VS_OP193_SEA-2_L3_stanford_stn_control_q30_Rep0.bam.unique.tagAlign.narrowPeak.gz
OP342_SKN-1_L4_stanford_stn_GFP	SKN-1	L4	83	spp.idrOptimal.bf.ce.OP342_SKN-1_L4_stanford_stn_GFP_a_F_L_B_q30_Rep0.bam.unique.tagAlign_VS_OP342_SKN-1_L4_stanford_stn_control_q30_Rep0.bam.unique.tagAlign.narrowPeak.gz
OP130_SMA-9_L2_stanford_stn_GFP	SMA-9	L2	97	spp.idrOptimal.bf.ce.OP130_SMA-9_L2_stanford_stn_GFP_a_F_L_B_q30_Rep0.bam.unique.tagAlign_VS_OP130_SMA-9_L2_stanford_stn_control_q30_Rep0.bam.unique.tagAlign.narrowPeak.gz
OP321_TLP-1_L1_yale_stn_GFP	TLP-1	L1	283	spp.idrOptimal.bf.ce.OP321_TLP-1_L1_yale_stn_GFP_a_F_L_B_q30_Rep0.bam.unique.tagAlign_VS_OP321_TLP-1_L1_yale_stn_control_q30_Rep0.bam.unique.tagAlign.narrowPeak.gz
OP395_UNC-30_L1_stanford_stn_GFP	UNC-30	L1	69	spp.idrOptimal.bf.ce.OP395_UNC-30_L1_stanford_stn_GFP_a_F_L_B_q30_Rep0.bam.unique.tagAlign_VS_OP395_UNC-30_L1_stanford_stn_control_q30_Rep0.bam.unique.tagAlign.narrowPeak.gz
OP186_UNC-39_L2_stanford_stn_GFP	UNC-39	L2	207	spp.idrOptimal.bf.ce.OP186_UNC-39_L2_stanford_stn_GFP_a_F_L_B_q30_Rep0.bam.unique.tagAlign_VS_OP186_UNC-39_L2_stanford_stn_control_q30_Rep0.bam.unique.tagAlign.narrowPeak.gz
OP186_UNC-39_L3_stanford_stn_GFP	UNC-39	L3	239	spp.idrOptimal.bf.ce.OP186_UNC-39_L3_stanford_stn_GFP_ab_F_L_B_q30_Rep0.bam.unique.tagAlign_VS_OP186_UNC-39_L3_stanford_stn_control_q30_Rep0.bam.unique.tagAlign.narrowPeak.gz
OP186_UNC-39_L4_stanford_stn_GFP	UNC-39	L4	147	spp.idrOptimal.bf.ce.OP186_UNC-39_L4_stanford_stn_GFP_a_F_L_B_q30_Rep0.bam.unique.tagAlign_VS_OP186_UNC-39_L4_stanford_stn_control_q30_Rep0.bam.unique.tagAlign.narrowPeak.gz
OP600_UNC-62_L1_stanford_stn_GFP	UNC-62	L1	199	spp.idrOptimal.bf.ce.OP600_UNC-62_L1_stanford_stn_GFP_a_F_L_B_q30_Rep0.bam.unique.tagAlign_VS_OP600_UNC-62_L1_stanford_stn_control_q30_Rep0.bam.unique.tagAlign.narrowPeak.gz
OP600_UNC-62_L2_stanford_stn_GFP	UNC-62	L2	399	spp.idrOptimal.bf.ce.OP600_UNC-62_L2_stanford_stn_GFP_a_F_L_B_q30_Rep0.bam.unique.tagAlign_VS_OP600_UNC-62_L2_stanford_stn_control_q30_Rep0.bam.unique.tagAlign.narrowPeak.gz
OP602_UNC-62_L3_stanford_stn_GFP	UNC-62	L3	166	spp.idrOptimal.bf.ce.OP602_UNC-62_L3_stanford_stn_GFP_a_F_L_B_q30_Rep0.bam.unique.tagAlign_VS_OP602_UNC-62_L3_stanford_stn_control_q30_Rep0.bam.unique.tagAlign.narrowPeak.gz
OP601_UNC-62_L4_stanford_stn_GFP	UNC-62	L4	219	spp.idrOptimal.bf.ce.OP601_UNC-62_L4_stanford_stn_GFP_a_F_L_B_q30_Rep0.bam.unique.tagAlign_VS_OP601_UNC-62_L4_stanford_stn_control_q30_Rep0.bam.unique.tagAlign.narrowPeak.gz
OP602_UNC-62_L4_stanford_stn_GFP	UNC-62	L4	199	spp.idrOptimal.bf.ce.OP602_UNC-62_L4_stanford_stn_GFP_a_F_L_B_q30_Rep0.bam.unique.tagAlign_VS_OP602_UNC-62_L4_stanford_stn_control_q30_Rep0.bam.unique.tagAlign.narrowPeak.gz
OP231_ZK546.5_L4_stanford_ff4_GFP	ZK546.5	L4	81	spp.idrOptimal.bf.ce.OP231_ZK546.5_L4_stanford_ff4_GFP_a_F_L_B_q30_Rep0.bam.unique.tagAlign_VS_OP231_ZK546.5_L4_stanford_ff4_control_q30_Rep0.bam.unique.tagAlign.narrowPeak.gz
OP236_ZTF-11_L1_stanford_stn_GFP	ZTF-11	L1	98	spp.idrOptimal.bf.ce.OP236_ZTF-11_L1_stanford_stn_GFP_a_F_L_B_q30_Rep0.bam.unique.tagAlign_VS_OP236_ZTF-11_L1_stanford_stn_control_q30_Rep0.bam.unique.tagAlign.narrowPeak.gz
OP236_ZTF-11_L2_stanford_stn_GFP	ZTF-11	L2	218	spp.idrOptimal.bf.ce.OP236_ZTF-11_L2_stanford_stn_GFP_a_F_L_B_q30_Rep0.bam.unique.tagAlign_VS_OP236_ZTF-11_L2_stanford_stn_control_q30_Rep0.bam.unique.tagAlign.narrowPeak.gz
OP236_ZTF-11_L3_stanford_stn_GFP	ZTF-11	L3	99	spp.idrOptimal.bf.ce.OP236_ZTF-11_L3_stanford_stn_GFP_a_F_L_B_q30_Rep0.bam.unique.tagAlign_VS_OP236_ZTF-11_L3_stanford_stn_control_q30_Rep0.bam.unique.tagAlign.narrowPeak.gz
OP236_ZTF-11_L4_stanford_stn_GFP	ZTF-11	L4	239	spp.idrOptimal.bf.ce.OP236_ZTF-11_L4_stanford_stn_GFP_a_F_L_B_q30_Rep0.bam.unique.tagAlign_VS_OP236_ZTF-11_L4_stanford_stn_control_q30_Rep0.bam.unique.tagAlign.narrowPeak.gz

## Sheet: Human_TFs_SPP
FILENAME	CELLTYPE	HGNC TARGET NAME	NPEAKS IDR OPTIMAL (IDR 2%) BLACKLIST FILTERED	PEAK_CALL_FILE
wgEncodeSydhTfbsHepg2Arid3anb100279IggrabAlnRep0	HepG2	ARID3A	17622	spp.idrOptimal.bf.wgEncodeSydhTfbsHepg2Arid3anb100279IggrabAlnRep0.bam_VS_wgEncodeSydhTfbsHepg2InputIggrabAln.bam.narrowPeak.gz
wgEncodeSydhTfbsK562Arid3asc8821IggrabAlnRep0	K562	ARID3A	9026	spp.idrOptimal.bf.wgEncodeSydhTfbsK562Arid3asc8821IggrabAlnRep0.bam_VS_wgEncodeSydhTfbsK562InputIggrabAln.bam.narrowPeak.gz
wgEncodeSydhTfbsK562Atf106325StdAlnRep0	K562	ATF1	14864	spp.idrOptimal.bf.wgEncodeSydhTfbsK562Atf106325StdAlnRep0.bam_VS_wgEncodeSydhTfbsK562InputStdAlnRep0.bam.narrowPeak.gz
wgEncodeHaibTfbsGm12878Atf2sc81188V0422111AlnRep0	GM12878	ATF2	23467	spp.idrOptimal.bf.wgEncodeHaibTfbsGm12878Atf2sc81188V0422111AlnRep0.bam_VS_wgEncodeHaibTfbsGm12878ControlV0422111AlnRep0.bam.narrowPeak.gz
wgEncodeHaibTfbsH1hescAtf2sc81188V0422111AlnRep0	H1-hESC	ATF2	5998	spp.idrOptimal.bf.wgEncodeHaibTfbsH1hescAtf2sc81188V0422111AlnRep0.bam_VS_wgEncodeHaibTfbsH1hescControlV0422111AlnRep1.bam.narrowPeak.gz
wgEncodeHaibTfbsA549Atf3V0422111Etoh02AlnRep0	A549	ATF3	6580	spp.idrOptimal.bf.wgEncodeHaibTfbsA549Atf3V0422111Etoh02AlnRep0.bam_VS_wgEncodeHaibTfbsA549RxlchPcr1xEtoh02AlnRep0.bam.narrowPeak.gz
wgEncodeHaibTfbsGm12878Atf3Pcr1xAlnRep0	GM12878	ATF3	1677	spp.idrOptimal.bf.wgEncodeHaibTfbsGm12878Atf3Pcr1xAlnRep0.bam_VS_wgEncodeHaibTfbsGm12878RxlchPcr1xAlnRep0.bam.narrowPeak.gz
wgEncodeHaibTfbsH1hescAtf3V0416102AlnRep0	H1-hESC	ATF3	4808	spp.idrOptimal.bf.wgEncodeHaibTfbsH1hescAtf3V0416102AlnRep0.bam_VS_wgEncodeHaibTfbsH1hescRxlchPcr1xAlnRep0.bam.narrowPeak.gz
wgEncodeHaibTfbsHepg2Atf3V0416101AlnRep0	HepG2	ATF3	3291	spp.idrOptimal.bf.wgEncodeHaibTfbsHepg2Atf3V0416101AlnRep0.bam_VS_wgEncodeHaibTfbsHepg2RxlchPcr1xAlnRep0.bam.narrowPeak.gz
wgEncodeSydhTfbsK562Atf3StdAlnRep0	K562	ATF3	1233	spp.idrOptimal.bf.wgEncodeSydhTfbsK562Atf3StdAlnRep0.bam_VS_wgEncodeSydhTfbsK562InputStdAlnRep0.bam.narrowPeak.gz
wgEncodeHaibTfbsK562Atf3V0416101AlnRep0	K562	ATF3	16011	spp.idrOptimal.bf.wgEncodeHaibTfbsK562Atf3V0416101AlnRep0.bam_VS_wgEncodeHaibTfbsK562RxlchPcr1xAlnRep0.bam.narrowPeak.gz
wgEncodeSydhTfbsH1hescBach1sc14700IggrabAlnRep0	H1-hESC	BACH1	11457	spp.idrOptimal.bf.wgEncodeSydhTfbsH1hescBach1sc14700IggrabAlnRep0.bam_VS_wgEncodeSydhTfbsH1hescInputIggrabAln.bam.narrowPeak.gz
wgEncodeSydhTfbsK562Bach1sc14700IggrabAlnRep0	K562	BACH1	3806	spp.idrOptimal.bf.wgEncodeSydhTfbsK562Bach1sc14700IggrabAlnRep0.bam_VS_wgEncodeSydhTfbsK562InputIggrabAln.bam.narrowPeak.gz
wgEncodeUchicagoTfbsK562Bach1Controlbach1AlnRep0	K562	BACH1	323	spp.idrOptimal.bf.wgEncodeUchicagoTfbsK562Bach1Controlbach1AlnRep0.bam_VS_wgEncodeUchicagoTfbsK562InputControlbach1AlnRep1.bam.narrowPeak.gz
wgEncodeHaibTfbsGm12878BatfPcr1xAlnRep0	GM12878	BATF	32427	spp.idrOptimal.bf.wgEncodeHaibTfbsGm12878BatfPcr1xAlnRep0.bam_VS_wgEncodeHaibTfbsGm12878RxlchPcr1xAlnRep0.bam.narrowPeak.gz
wgEncodeHaibTfbsGm12878Bcl11aPcr1xAlnRep0	GM12878	BCL11A	17876	spp.idrOptimal.bf.wgEncodeHaibTfbsGm12878Bcl11aPcr1xAlnRep0.bam_VS_wgEncodeHaibTfbsGm12878RxlchPcr1xAlnRep0.bam.narrowPeak.gz
wgEncodeHaibTfbsH1hescBcl11aPcr1xAlnRep0	H1-hESC	BCL11A	2518	spp.idrOptimal.bf.wgEncodeHaibTfbsH1hescBcl11aPcr1xAlnRep0.bam_VS_wgEncodeHaibTfbsH1hescRxlchPcr1xAlnRep0.bam.narrowPeak.gz
wgEncodeHaibTfbsA549Bcl3V0422111Etoh02AlnRep0	A549	BCL3	7740	spp.idrOptimal.bf.wgEncodeHaibTfbsA549Bcl3V0422111Etoh02AlnRep0.bam_VS_wgEncodeHaibTfbsA549RxlchPcr1xEtoh02AlnRep0.bam.narrowPeak.gz
wgEncodeHaibTfbsGm12878Bcl3V0416101AlnRep0	GM12878	BCL3	15455	spp.idrOptimal.bf.wgEncodeHaibTfbsGm12878Bcl3V0416101AlnRep0.bam_VS_wgEncodeHaibTfbsGm12878RxlchPcr1xAlnRep0.bam.narrowPeak.gz
wgEncodeHaibTfbsK562Bcl3Pcr1xAlnRep0	K562	BCL3	1603	spp.idrOptimal.bf.wgEncodeHaibTfbsK562Bcl3Pcr1xAlnRep0.bam_VS_wgEncodeHaibTfbsK562RxlchPcr1xAlnRep0.bam.narrowPeak.gz
wgEncodeHaibTfbsGm12878Bclaf101388V0416101AlnRep0	GM12878	BCLAF1	6114	spp.idrOptimal.bf.wgEncodeHaibTfbsGm12878Bclaf101388V0416101AlnRep0.bam_VS_wgEncodeHaibTfbsGm12878RxlchPcr1xAlnRep0.bam.narrowPeak.gz
wgEncodeHaibTfbsK562Bclaf101388Pcr1xAlnRep0	K562	BCLAF1	4444	spp.idrOptimal.bf.wgEncodeHaibTfbsK562Bclaf101388Pcr1xAlnRep0.bam_VS_wgEncodeHaibTfbsK562RxlchPcr1xAlnRep0.bam.narrowPeak.gz
wgEncodeSydhTfbsHelas3Bdp1StdAlnRep0	HeLa-S3	BDP1	508	spp.idrOptimal.bf.wgEncodeSydhTfbsHelas3Bdp1StdAlnRep0.bam_VS_wgEncodeSydhTfbsHelas3InputStdAlnRep1.bam.narrowPeak.gz
wgEncodeSydhTfbsK562Bdp1StdAlnRep0	K562	BDP1	570	spp.idrOptimal.bf.wgEncodeSydhTfbsK562Bdp1StdAlnRep0.bam_VS_wgEncodeSydhTfbsK562InputStdAlnRep0.bam.narrowPeak.gz
wgEncodeSydhTfbsA549Bhlhe40IggrabAlnRep0	A549	BHLHE40	3123	spp.idrOptimal.bf.wgEncodeSydhTfbsA549Bhlhe40IggrabAlnRep0.bam_VS_wgEncodeSydhTfbsA549InputIggrabAlnRep1.bam.narrowPeak.gz
wgEncodeSydhTfbsGm12878Bhlhe40cIggmusAlnRep0	GM12878	BHLHE40	13986	spp.idrOptimal.bf.wgEncodeSydhTfbsGm12878Bhlhe40cIggmusAlnRep0.bam_VS_wgEncodeSydhTfbsGm12878InputIggmusAlnRep0.bam.narrowPeak.gz
wgEncodeHaibTfbsHepg2Bhlhe40V0416101AlnRep0	HepG2	BHLHE40	2859	spp.idrOptimal.bf.wgEncodeHaibTfbsHepg2Bhlhe40V0416101AlnRep0.bam_VS_wgEncodeHaibTfbsHepg2RxlchPcr1xAlnRep0.bam.narrowPeak.gz
wgEncodeSydhTfbsHepg2Bhlhe40cIggrabAlnRep0	HepG2	BHLHE40	14628	spp.idrOptimal.bf.wgEncodeSydhTfbsHepg2Bhlhe40cIggrabAlnRep0.bam_VS_wgEncodeSydhTfbsHepg2InputIggrabAln.bam.narrowPeak.gz
wgEncodeSydhTfbsK562Bhlhe40nb100IggrabAlnRep0	K562	BHLHE40	22497	spp.idrOptimal.bf.wgEncodeSydhTfbsK562Bhlhe40nb100IggrabAlnRep0.bam_VS_wgEncodeSydhTfbsK562InputIggrabAln.bam.narrowPeak.gz
wgEncodeSydhTfbsGm12878Brca1a300IggmusAlnRep0	GM12878	BRCA1	551	spp.idrOptimal.bf.wgEncodeSydhTfbsGm12878Brca1a300IggmusAlnRep0.bam_VS_wgEncodeSydhTfbsGm12878InputIggmusAlnRep0.bam.narrowPeak.gz
wgEncodeSydhTfbsH1hescBrca1IggrabAlnRep0	H1-hESC	BRCA1	2025	spp.idrOptimal.bf.wgEncodeSydhTfbsH1hescBrca1IggrabAlnRep0.bam_VS_wgEncodeSydhTfbsH1hescInputIggrabAln.bam.narrowPeak.gz
wgEncodeSydhTfbsHelas3Brca1a300IggrabAlnRep0	HeLa-S3	BRCA1	8114	spp.idrOptimal.bf.wgEncodeSydhTfbsHelas3Brca1a300IggrabAlnRep0.bam_VS_wgEncodeSydhTfbsHelas3InputIggrabAlnRep1.bam.narrowPeak.gz
wgEncodeSydhTfbsHepg2Brca1a300IggrabAlnRep0	HepG2	BRCA1	1497	spp.idrOptimal.bf.wgEncodeSydhTfbsHepg2Brca1a300IggrabAlnRep0.bam_VS_wgEncodeSydhTfbsHepg2InputIggrabAln.bam.narrowPeak.gz
wgEncodeSydhTfbsHelas3Brf1StdAlnRep0	HeLa-S3	BRF1	193	spp.idrOptimal.bf.wgEncodeSydhTfbsHelas3Brf1StdAlnRep0.bam_VS_wgEncodeSydhTfbsHelas3InputStdAlnRep1.bam.narrowPeak.gz
wgEncodeSydhTfbsK562Brf1StdAlnRep0	K562	BRF1	221	spp.idrOptimal.bf.wgEncodeSydhTfbsK562Brf1StdAlnRep0.bam_VS_wgEncodeSydhTfbsK562InputStdAlnRep0.bam.narrowPeak.gz
wgEncodeSydhTfbsHelas3Brf2StdAlnRep0	HeLa-S3	BRF2	303	spp.idrOptimal.bf.wgEncodeSydhTfbsHelas3Brf2StdAlnRep0.bam_VS_wgEncodeSydhTfbsHelas3InputStdAlnRep1.bam.narrowPeak.gz
wgEncodeSydhTfbsK562Brf2StdAlnRep0	K562	BRF2	1087	spp.idrOptimal.bf.wgEncodeSydhTfbsK562Brf2StdAlnRep0.bam_VS_wgEncodeSydhTfbsK562InputStdAlnRep0.bam.narrowPeak.gz
wgEncodeHaibTfbsK562Cbx3sc101004V0422111AlnRep0	K562	CBX3	20723	spp.idrOptimal.bf.wgEncodeHaibTfbsK562Cbx3sc101004V0422111AlnRep0.bam_VS_wgEncodeHaibTfbsK562ControlV0422111AlnRep1.bam.narrowPeak.gz
wgEncodeUchicagoTfbsK562Ccne1Controlccne1AlnRep0	K562	CCNE1	1	spp.idrOptimal.bf.wgEncodeUchicagoTfbsK562Ccne1Controlccne1AlnRep0.bam_VS_wgEncodeUchicagoTfbsK562InputControlccne1AlnRep1.bam.narrowPeak.gz
wgEncodeSydhTfbsK562Ccnt2StdAlnRep0	K562	CCNT2	20057	spp.idrOptimal.bf.wgEncodeSydhTfbsK562Ccnt2StdAlnRep0.bam_VS_wgEncodeSydhTfbsK562InputStdAlnRep0.bam.narrowPeak.gz
wgEncodeSydhTfbsA549CebpbIggrabAlnRep0	A549	CEBPB	38845	spp.idrOptimal.bf.wgEncodeSydhTfbsA549CebpbIggrabAlnRep0.bam_VS_wgEncodeSydhTfbsA549InputIggrabAlnRep1.bam.narrowPeak.gz
wgEncodeHaibTfbsGm12878Cebpbsc150V0422111AlnRep0	GM12878	CEBPB	5786	spp.idrOptimal.bf.wgEncodeHaibTfbsGm12878Cebpbsc150V0422111AlnRep0.bam_VS_wgEncodeHaibTfbsGm12878ControlV0422111AlnRep0.bam.narrowPeak.gz
wgEncodeSydhTfbsH1hescCebpbIggrabAlnRep0	H1-hESC	CEBPB	15557	spp.idrOptimal.bf.wgEncodeSydhTfbsH1hescCebpbIggrabAlnRep0.bam_VS_wgEncodeSydhTfbsH1hescInputIggrabAln.bam.narrowPeak.gz
wgEncodeSydhTfbsHelas3CebpbIggrabAlnRep0	HeLa-S3	CEBPB	61004	spp.idrOptimal.bf.wgEncodeSydhTfbsHelas3CebpbIggrabAlnRep0.bam_VS_wgEncodeSydhTfbsHelas3InputIggrabAlnRep1.bam.narrowPeak.gz
wgEncodeSydhTfbsHepg2CebpbForsklnStdAlnRep0	HepG2	CEBPB	18443	spp.idrOptimal.bf.wgEncodeSydhTfbsHepg2CebpbForsklnStdAlnRep0.bam_VS_wgEncodeSydhTfbsHepg2InputForsklnStdAlnRep0.bam.narrowPeak.gz
wgEncodeSydhTfbsHepg2CebpbIggrabAlnRep0	HepG2	CEBPB	56629	spp.idrOptimal.bf.wgEncodeSydhTfbsHepg2CebpbIggrabAlnRep0.bam_VS_wgEncodeSydhTfbsHepg2InputIggrabAln.bam.narrowPeak.gz
wgEncodeHaibTfbsHepg2Cebpbsc150V0416101AlnRep0	HepG2	CEBPB	18125	spp.idrOptimal.bf.wgEncodeHaibTfbsHepg2Cebpbsc150V0416101AlnRep0.bam_VS_wgEncodeHaibTfbsHepg2RxlchPcr1xAlnRep0.bam.narrowPeak.gz
wgEncodeSydhTfbsImr90CebpbIggrabAlnRep0	IMR90	CEBPB	70445	spp.idrOptimal.bf.wgEncodeSydhTfbsImr90CebpbIggrabAlnRep0.bam_VS_wgEncodeSydhTfbsImr90InputIggrabAlnRep1.bam.narrowPeak.gz
wgEncodeSydhTfbsK562CebpbIggrabAlnRep0	K562	CEBPB	38715	spp.idrOptimal.bf.wgEncodeSydhTfbsK562CebpbIggrabAlnRep0.bam_VS_wgEncodeSydhTfbsK562InputIggrabAln.bam.narrowPeak.gz
wgEncodeHaibTfbsK562Cebpbsc150V0422111AlnRep0	K562	CEBPB	22240	spp.idrOptimal.bf.wgEncodeHaibTfbsK562Cebpbsc150V0422111AlnRep0.bam_VS_wgEncodeHaibTfbsK562ControlV0422111AlnRep1.bam.narrowPeak.gz
wgEncodeHaibTfbsHepg2Cebpdsc636V0416101AlnRep0	HepG2	CEBPD	11433	spp.idrOptimal.bf.wgEncodeHaibTfbsHepg2Cebpdsc636V0416101AlnRep0.bam_VS_wgEncodeHaibTfbsHepg2RxlchPcr1xAlnRep0.bam.narrowPeak.gz
wgEncodeSydhTfbsHepg2CebpzIggrabAlnRep0	HepG2	CEBPZ	409	spp.idrOptimal.bf.wgEncodeSydhTfbsHepg2CebpzIggrabAlnRep0.bam_VS_wgEncodeSydhTfbsHepg2InputIggrabAln.bam.narrowPeak.gz
wgEncodeSydhTfbsGm12878Chd1a301218aIggmusAlnRep0	GM12878	CHD1	6668	spp.idrOptimal.bf.wgEncodeSydhTfbsGm12878Chd1a301218aIggmusAlnRep0.bam_VS_wgEncodeSydhTfbsGm12878InputIggmusAlnRep0.bam.narrowPeak.gz
wgEncodeBroadHistoneH1hescChd1a301218aStdAlnRep0	H1-hESC	CHD1	7247	spp.idrOptimal.bf.wgEncodeBroadHistoneH1hescChd1a301218aStdAlnRep0.bam_VS_wgEncodeBroadHistoneH1hescControlStdAlnRep0.bam.narrowPeak.gz
wgEncodeSydhTfbsH1hescChd1a301218aIggrabAlnRep0	H1-hESC	CHD1	2191	spp.idrOptimal.bf.wgEncodeSydhTfbsH1hescChd1a301218aIggrabAlnRep0.bam_VS_wgEncodeSydhTfbsH1hescInputIggrabAln.bam.narrowPeak.gz
wgEncodeBroadHistoneK562Chd1a301218aStdAlnRep0	K562	CHD1	9350	spp.idrOptimal.bf.wgEncodeBroadHistoneK562Chd1a301218aStdAlnRep0.bam_VS_wgEncodeBroadHistoneK562ControlStdAlnRep1.bam.narrowPeak.gz
wgEncodeSydhTfbsGm12878Chd2ab68301IggmusAlnRep0	GM12878	CHD2	15597	spp.idrOptimal.bf.wgEncodeSydhTfbsGm12878Chd2ab68301IggmusAlnRep0.bam_VS_wgEncodeSydhTfbsGm12878InputIggmusAlnRep0.bam.narrowPeak.gz
wgEncodeSydhTfbsH1hescChd2IggrabAlnRep0	H1-hESC	CHD2	6849	spp.idrOptimal.bf.wgEncodeSydhTfbsH1hescChd2IggrabAlnRep0.bam_VS_wgEncodeSydhTfbsH1hescInputIggrabAln.bam.narrowPeak.gz
wgEncodeSydhTfbsHelas3Chd2IggrabAlnRep0	HeLa-S3	CHD2	20500	spp.idrOptimal.bf.wgEncodeSydhTfbsHelas3Chd2IggrabAlnRep0.bam_VS_wgEncodeSydhTfbsHelas3InputIggrabAlnRep1.bam.narrowPeak.gz
wgEncodeSydhTfbsHepg2Chd2ab68301IggrabAlnRep0	HepG2	CHD2	5169	spp.idrOptimal.bf.wgEncodeSydhTfbsHepg2Chd2ab68301IggrabAlnRep0.bam_VS_wgEncodeSydhTfbsHepg2InputIggrabAln.bam.narrowPeak.gz
wgEncodeSydhTfbsK562Chd2ab68301IggrabAlnRep0	K562	CHD2	7797	spp.idrOptimal.bf.wgEncodeSydhTfbsK562Chd2ab68301IggrabAlnRep0.bam_VS_wgEncodeSydhTfbsK562InputIggrabAln.bam.narrowPeak.gz
wgEncodeHaibTfbsA549Creb1sc240V0416102Dex100nmAlnRep0	A549	CREB1	15913	spp.idrOptimal.bf.wgEncodeHaibTfbsA549Creb1sc240V0416102Dex100nmAlnRep0.bam_VS_wgEncodeHaibTfbsA549Creb1sc240Pcr1xEtoh02AlnRep0.bam.narrowPeak.gz
wgEncodeOpenChromChipA549CtcfAlnRep0	A549	CTCF	55351	spp.idrOptimal.bf.wgEncodeOpenChromChipA549CtcfAlnRep0.bam_VS_wgEncodeOpenChromChipA549InputAln.bam.narrowPeak.gz
wgEncodeUwTfbsA549CtcfStdAlnRep0	A549	CTCF	45732	spp.idrOptimal.bf.wgEncodeUwTfbsA549CtcfStdAlnRep0.bam_VS_wgEncodeUwTfbsA549InputStdAlnRep1.bam.narrowPeak.gz
wgEncodeHaibTfbsA549Ctcfsc5916Pcr1xDex100nmAlnRep0	A549	CTCF	40841	spp.idrOptimal.bf.wgEncodeHaibTfbsA549Ctcfsc5916Pcr1xDex100nmAlnRep0.bam_VS_wgEncodeHaibTfbsA549RxlchPcr1xDex100nmAlnRep0.bam.narrowPeak.gz
wgEncodeHaibTfbsA549Ctcfsc5916Pcr1xEtoh02AlnRep0	A549	CTCF	38133	spp.idrOptimal.bf.wgEncodeHaibTfbsA549Ctcfsc5916Pcr1xEtoh02AlnRep0.bam_VS_wgEncodeHaibTfbsA549RxlchPcr1xEtoh02AlnRep0.bam.narrowPeak.gz
wgEncodeUwTfbsAg04449CtcfStdAlnRep0	AG04449	CTCF	50260	spp.idrOptimal.bf.wgEncodeUwTfbsAg04449CtcfStdAlnRep0.bam_VS_wgEncodeUwTfbsAg04449InputStdAlnRep1.bam.narrowPeak.gz
wgEncodeUwTfbsAg04450CtcfStdAlnRep0	AG04450	CTCF	46500	spp.idrOptimal.bf.wgEncodeUwTfbsAg04450CtcfStdAlnRep0.bam_VS_wgEncodeUwTfbsAg04450InputStdAlnRep1.bam.narrowPeak.gz
wgEncodeUwTfbsAg09309CtcfStdAlnRep0	AG09309	CTCF	43928	spp.idrOptimal.bf.wgEncodeUwTfbsAg09309CtcfStdAlnRep0.bam_VS_wgEncodeUwTfbsAg09309InputStdAlnRep1.bam.narrowPeak.gz
wgEncodeUwTfbsAg09319CtcfStdAlnRep0	AG09319	CTCF	49675	spp.idrOptimal.bf.wgEncodeUwTfbsAg09319CtcfStdAlnRep0.bam_VS_wgEncodeUwTfbsAg09319InputStdAlnRep1.bam.narrowPeak.gz
wgEncodeUwTfbsAg10803CtcfStdAlnRep0	AG10803	CTCF	47656	spp.idrOptimal.bf.wgEncodeUwTfbsAg10803CtcfStdAlnRep0.bam_VS_wgEncodeUwTfbsAg10803InputStdAlnRep1.bam.narrowPeak.gz
wgEncodeUwTfbsAoafCtcfStdAlnRep0	AoAF	CTCF	45960	spp.idrOptimal.bf.wgEncodeUwTfbsAoafCtcfStdAlnRep0.bam_VS_wgEncodeUwTfbsAoafInputStdAlnRep1.bam.narrowPeak.gz
wgEncodeUwTfbsBe2cCtcfStdAlnRep0	BE2_C	CTCF	54655	spp.idrOptimal.bf.wgEncodeUwTfbsBe2cCtcfStdAlnRep0.bam_VS_wgEncodeUwTfbsBe2cInputStdAlnRep1.bam.narrowPeak.gz
wgEncodeUwTfbsBjCtcfStdAlnRep0	BJ	CTCF	44668	spp.idrOptimal.bf.wgEncodeUwTfbsBjCtcfStdAlnRep0.bam_VS_wgEncodeUwTfbsBjInputStdAlnRep1.bam.narrowPeak.gz
wgEncodeUwTfbsCaco2CtcfStdAlnRep0	Caco-2	CTCF	46852	spp.idrOptimal.bf.wgEncodeUwTfbsCaco2CtcfStdAlnRep0.bam_VS_wgEncodeUwTfbsCaco2InputStdAlnRep1.bam.narrowPeak.gz
wgEncodeBroadHistoneDnd41CtcfAlnRep0	Dnd41	CTCF	50070	spp.idrOptimal.bf.wgEncodeBroadHistoneDnd41CtcfAlnRep0.bam_VS_wgEncodeBroadHistoneDnd41ControlStdAlnRep0.bam.narrowPeak.gz
wgEncodeHaibTfbsEcc1CtcfcV0416102Dm002p1hAlnRep0	ECC-1	CTCF	23192	spp.idrOptimal.bf.wgEncodeHaibTfbsEcc1CtcfcV0416102Dm002p1hAlnRep0.bam_VS_wgEncodeHaibTfbsEcc1RxlchV0416102Dm002p1hAlnRep1.bam.narrowPeak.gz
wgEncodeOpenChromChipFibroblCtcfAlnRep0	Fibrobl	CTCF	45978	spp.idrOptimal.bf.wgEncodeOpenChromChipFibroblCtcfAlnRep0.bam_VS_wgEncodeOpenChromChipFibroblInputAln.bam.narrowPeak.gz
wgEncodeOpenChromChipGlioblaCtcfAlnRep0	Gliobla	CTCF	62772	spp.idrOptimal.bf.wgEncodeOpenChromChipGlioblaCtcfAlnRep0.bam_VS_wgEncodeOpenChromChipGlioblaInputAln.bam.narrowPeak.gz
wgEncodeUwTfbsGm06990CtcfStdAlnRep0	GM06990	CTCF	45500	spp.idrOptimal.bf.wgEncodeUwTfbsGm06990CtcfStdAlnRep0.bam_VS_wgEncodeUwTfbsGm06990InputStdAlnRep1.bam.narrowPeak.gz
wgEncodeUwTfbsGm12801CtcfStdAlnRep1	GM12801	CTCF	2883	spp.idrOptimal.bf.wgEncodeUwTfbsGm12801CtcfStdAlnRep1.bam_VS_wgEncodeUwTfbsGm12801InputStdAlnRep1.bam.narrowPeak.gz
wgEncodeUwTfbsGm12864CtcfStdAlnRep0	GM12864	CTCF	46798	spp.idrOptimal.bf.wgEncodeUwTfbsGm12864CtcfStdAlnRep0.bam_VS_wgEncodeUwTfbsGm12864InputStdAlnRep1.bam.narrowPeak.gz
wgEncodeUwTfbsGm12865CtcfStdAlnRep0	GM12865	CTCF	44069	spp.idrOptimal.bf.wgEncodeUwTfbsGm12865CtcfStdAlnRep0.bam_VS_wgEncodeUwTfbsGm12865InputStdAlnRep1.bam.narrowPeak.gz
wgEncodeUwTfbsGm12872CtcfStdAlnRep0	GM12872	CTCF	47151	spp.idrOptimal.bf.wgEncodeUwTfbsGm12872CtcfStdAlnRep0.bam_VS_wgEncodeUwTfbsGm12872InputStdAlnRep1.bam.narrowPeak.gz
wgEncodeUwTfbsGm12873CtcfStdAlnRep0	GM12873	CTCF	51005	spp.idrOptimal.bf.wgEncodeUwTfbsGm12873CtcfStdAlnRep0.bam_VS_wgEncodeUwTfbsGm12873InputStdAlnRep1.bam.narrowPeak.gz
wgEncodeUwTfbsGm12874CtcfStdAlnRep0	GM12874	CTCF	37517	spp.idrOptimal.bf.wgEncodeUwTfbsGm12874CtcfStdAlnRep0.bam_VS_wgEncodeUwTfbsGm12874InputStdAlnRep1.bam.narrowPeak.gz
wgEncodeUwTfbsGm12875CtcfStdAlnRep0	GM12875	CTCF	39184	spp.idrOptimal.bf.wgEncodeUwTfbsGm12875CtcfStdAlnRep0.bam_VS_wgEncodeUwTfbsGm12875InputStdAlnRep1.bam.narrowPeak.gz
wgEncodeBroadHistoneGm12878CtcfStdAlnRep0	GM12878	CTCF	44982	spp.idrOptimal.bf.wgEncodeBroadHistoneGm12878CtcfStdAlnRep0.bam_VS_wgEncodeBroadHistoneGm12878ControlStdAlnRep0.bam.narrowPeak.gz
wgEncodeOpenChromChipGm12878CtcfAlnRep0	GM12878	CTCF	48916	spp.idrOptimal.bf.wgEncodeOpenChromChipGm12878CtcfAlnRep0.bam_VS_wgEncodeOpenChromChipGm12878InputAln.bam.narrowPeak.gz
wgEncodeUwTfbsGm12878CtcfStdAlnRep0	GM12878	CTCF	40122	spp.idrOptimal.bf.wgEncodeUwTfbsGm12878CtcfStdAlnRep0.bam_VS_wgEncodeUwTfbsGm12878InputStdAlnRep1.bam.narrowPeak.gz
wgEncodeSydhTfbsGm12878Ctcfsc15914c20StdAlnRep0	GM12878	CTCF	55551	spp.idrOptimal.bf.wgEncodeSydhTfbsGm12878Ctcfsc15914c20StdAlnRep0.bam_VS_wgEncodeSydhTfbsGm12878InputStdAlnRep1.bam.narrowPeak.gz
wgEncodeOpenChromChipGm12891CtcfAlnRep0	GM12891	CTCF	42632	spp.idrOptimal.bf.wgEncodeOpenChromChipGm12891CtcfAlnRep0.bam_VS_wgEncodeOpenChromChipHepg2InputAln.bam.narrowPeak.gz
wgEncodeOpenChromChipGm12892CtcfAlnRep0	GM12892	CTCF	48306	spp.idrOptimal.bf.wgEncodeOpenChromChipGm12892CtcfAlnRep0.bam_VS_wgEncodeOpenChromChipGm12878InputAln.bam.narrowPeak.gz
wgEncodeOpenChromChipGm19238CtcfAlnRep0	GM19238	CTCF	49938	spp.idrOptimal.bf.wgEncodeOpenChromChipGm19238CtcfAlnRep0.bam_VS_wgEncodeOpenChromChipGm12878InputAln.bam.narrowPeak.gz
wgEncodeOpenChromChipGm19239CtcfAlnRep0	GM19239	CTCF	41085	spp.idrOptimal.bf.wgEncodeOpenChromChipGm19239CtcfAlnRep0.bam_VS_wgEncodeOpenChromChipHepg2InputAln.bam.narrowPeak.gz
wgEncodeOpenChromChipGm19240CtcfAlnRep0	GM19240	CTCF	46036	spp.idrOptimal.bf.wgEncodeOpenChromChipGm19240CtcfAlnRep0.bam_VS_wgEncodeOpenChromChipGm12878InputAln.bam.narrowPeak.gz
wgEncodeBroadHistoneH1hescCtcfStdAlnRep0	H1-hESC	CTCF	66551	spp.idrOptimal.bf.wgEncodeBroadHistoneH1hescCtcfStdAlnRep0.bam_VS_wgEncodeBroadHistoneH1hescControlStdAlnRep0.bam.narrowPeak.gz
wgEncodeOpenChromChipH1hescCtcfAlnRep1	H1-hESC	CTCF	43247	spp.idrOptimal.bf.wgEncodeOpenChromChipH1hescCtcfAlnRep1.bam_VS_wgEncodeOpenChromChipHepg2InputAln.bam.narrowPeak.gz
wgEncodeHaibTfbsH1hescCtcfsc5916V0416102AlnRep0	H1-hESC	CTCF	54111	spp.idrOptimal.bf.wgEncodeHaibTfbsH1hescCtcfsc5916V0416102AlnRep0.bam_VS_wgEncodeHaibTfbsH1hescRxlchPcr1xAlnRep0.bam.narrowPeak.gz
wgEncodeUwTfbsHaspCtcfStdAlnRep0	HA-sp	CTCF	46546	spp.idrOptimal.bf.wgEncodeUwTfbsHaspCtcfStdAlnRep0.bam_VS_wgEncodeUwTfbsHaspInputStdAlnRep1.bam.narrowPeak.gz
wgEncodeUwTfbsHacCtcfStdAlnRep0	HAc	CTCF	45591	spp.idrOptimal.bf.wgEncodeUwTfbsHacCtcfStdAlnRep0.bam_VS_wgEncodeUwTfbsHacInputStdAlnRep1.bam.narrowPeak.gz
wgEncodeUwTfbsHbmecCtcfStdAlnRep0	HBMEC	CTCF	58376	spp.idrOptimal.bf.wgEncodeUwTfbsHbmecCtcfStdAlnRep0.bam_VS_wgEncodeUwTfbsHbmecInputStdAlnRep1.bam.narrowPeak.gz
wgEncodeUwTfbsHcfaaCtcfStdAlnRep1	HCFaa	CTCF	41571	spp.idrOptimal.bf.wgEncodeUwTfbsHcfaaCtcfStdAlnRep1.bam_VS_wgEncodeUwTfbsHcfaaInputStdAlnRep1.bam.narrowPeak.gz
wgEncodeUwTfbsHcmCtcfStdAlnRep0	HCM	CTCF	50703	spp.idrOptimal.bf.wgEncodeUwTfbsHcmCtcfStdAlnRep0.bam_VS_wgEncodeUwTfbsHcmInputStdAlnRep1.bam.narrowPeak.gz
wgEncodeUwTfbsHcpeCtcfStdAlnRep0	HCPEpiC	CTCF	61062	spp.idrOptimal.bf.wgEncodeUwTfbsHcpeCtcfStdAlnRep0.bam_VS_wgEncodeUwTfbsHcpeInputStdAlnRep1.bam.narrowPeak.gz
wgEncodeUwTfbsHct116CtcfStdAlnRep0	HCT-116	CTCF	50294	spp.idrOptimal.bf.wgEncodeUwTfbsHct116CtcfStdAlnRep0.bam_VS_wgEncodeUwTfbsHct116InputStdAlnRep1.bam.narrowPeak.gz
wgEncodeUwTfbsHeeCtcfStdAlnRep0	HEEpiC	CTCF	46226	spp.idrOptimal.bf.wgEncodeUwTfbsHeeCtcfStdAlnRep0.bam_VS_wgEncodeUwTfbsHeeInputStdAlnRep1.bam.narrowPeak.gz
wgEncodeUwTfbsHek293CtcfStdAlnRep0	HEK293	CTCF	47331	spp.idrOptimal.bf.wgEncodeUwTfbsHek293CtcfStdAlnRep0.bam_VS_wgEncodeUwTfbsHek293InputStdAlnRep1.bam.narrowPeak.gz
wgEncodeBroadHistoneHelas3CtcfStdAlnRep0	HeLa-S3	CTCF	52783	spp.idrOptimal.bf.wgEncodeBroadHistoneHelas3CtcfStdAlnRep0.bam_VS_wgEncodeBroadHistoneHelas3ControlStdAlnRep0.bam.narrowPeak.gz
wgEncodeOpenChromChipHelas3CtcfAlnRep0	HeLa-S3	CTCF	58806	spp.idrOptimal.bf.wgEncodeOpenChromChipHelas3CtcfAlnRep0.bam_VS_wgEncodeOpenChromChipHelas3InputAln.bam.narrowPeak.gz
wgEncodeUwTfbsHelas3CtcfStdAlnRep0	HeLa-S3	CTCF	38400	spp.idrOptimal.bf.wgEncodeUwTfbsHelas3CtcfStdAlnRep0.bam_VS_wgEncodeUwTfbsHelas3InputStdAlnRep1.bam.narrowPeak.gz
wgEncodeBroadHistoneHepg2CtcfStdAlnRep0	HepG2	CTCF	46448	spp.idrOptimal.bf.wgEncodeBroadHistoneHepg2CtcfStdAlnRep0.bam_VS_wgEncodeBroadHistoneHepg2ControlStdAlnRep0.bam.narrowPeak.gz
wgEncodeOpenChromChipHepg2CtcfAlnRep0	HepG2	CTCF	40800	spp.idrOptimal.bf.wgEncodeOpenChromChipHepg2CtcfAlnRep0.bam_VS_wgEncodeOpenChromChipHepg2InputAln.bam.narrowPeak.gz
wgEncodeUwTfbsHepg2CtcfStdAlnRep0	HepG2	CTCF	48708	spp.idrOptimal.bf.wgEncodeUwTfbsHepg2CtcfStdAlnRep0.bam_VS_wgEncodeUwTfbsHepg2InputStdAlnRep1.bam.narrowPeak.gz
wgEncodeHaibTfbsHepg2Ctcfsc5916V0416101AlnRep0	HepG2	CTCF	55778	spp.idrOptimal.bf.wgEncodeHaibTfbsHepg2Ctcfsc5916V0416101AlnRep0.bam_VS_wgEncodeHaibTfbsHepg2RxlchPcr1xAlnRep0.bam.narrowPeak.gz
wgEncodeUwTfbsHffCtcfStdAlnRep1	HFF	CTCF	34889	spp.idrOptimal.bf.wgEncodeUwTfbsHffCtcfStdAlnRep1.bam_VS_wgEncodeUwTfbsHffInputStdAlnRep1.bam.narrowPeak.gz
wgEncodeUwTfbsHffmycCtcfStdAlnRep0	HFF-Myc	CTCF	43821	spp.idrOptimal.bf.wgEncodeUwTfbsHffmycCtcfStdAlnRep0.bam_VS_wgEncodeUwTfbsHffmycInputStdAlnRep1.bam.narrowPeak.gz
wgEncodeUwTfbsHl60CtcfStdAlnRep1	HL-60	CTCF	16683	spp.idrOptimal.bf.wgEncodeUwTfbsHl60CtcfStdAlnRep1.bam_VS_wgEncodeUwTfbsHl60InputStdAlnRep1.bam.narrowPeak.gz
wgEncodeBroadHistoneHmecCtcfStdAlnRep0	HMEC	CTCF	40048	spp.idrOptimal.bf.wgEncodeBroadHistoneHmecCtcfStdAlnRep0.bam_VS_wgEncodeBroadHistoneHmecControlStdAlnRep0.bam.narrowPeak.gz
wgEncodeUwTfbsHmecCtcfStdAlnRep0	HMEC	CTCF	55897	spp.idrOptimal.bf.wgEncodeUwTfbsHmecCtcfStdAlnRep0.bam_VS_wgEncodeUwTfbsHmecInputStdAlnRep1.bam.narrowPeak.gz
wgEncodeUwTfbsHmfCtcfStdAlnRep0	HMF	CTCF	54171	spp.idrOptimal.bf.wgEncodeUwTfbsHmfCtcfStdAlnRep0.bam_VS_wgEncodeUwTfbsHmfInputStdAlnRep1.bam.narrowPeak.gz
wgEncodeUwTfbsHpafCtcfStdAlnRep0	HPAF	CTCF	56686	spp.idrOptimal.bf.wgEncodeUwTfbsHpafCtcfStdAlnRep0.bam_VS_wgEncodeUwTfbsHpafInputStdAlnRep1.bam.narrowPeak.gz
wgEncodeUwTfbsHpfCtcfStdAlnRep0	HPF	CTCF	46150	spp.idrOptimal.bf.wgEncodeUwTfbsHpfCtcfStdAlnRep0.bam_VS_wgEncodeUwTfbsHpfInputStdAlnRep1.bam.narrowPeak.gz
wgEncodeUwTfbsHreCtcfStdAlnRep0	HRE	CTCF	42295	spp.idrOptimal.bf.wgEncodeUwTfbsHreCtcfStdAlnRep0.bam_VS_wgEncodeUwTfbsHreInputStdAlnRep1.bam.narrowPeak.gz
wgEncodeUwTfbsHrpeCtcfStdAlnRep0	HRPEpiC	CTCF	53134	spp.idrOptimal.bf.wgEncodeUwTfbsHrpeCtcfStdAlnRep0.bam_VS_wgEncodeUwTfbsHrpeInputStdAlnRep1.bam.narrowPeak.gz
wgEncodeBroadHistoneHsmmCtcfStdAlnRep0	HSMM	CTCF	50924	spp.idrOptimal.bf.wgEncodeBroadHistoneHsmmCtcfStdAlnRep0.bam_VS_wgEncodeBroadHistoneHsmmControlStdAlnRep0.bam.narrowPeak.gz
wgEncodeBroadHistoneHsmmtCtcfStdAlnRep0	HSMMtube	CTCF	47949	spp.idrOptimal.bf.wgEncodeBroadHistoneHsmmtCtcfStdAlnRep0.bam_VS_wgEncodeBroadHistoneHsmmtControlStdAlnRep0.bam.narrowPeak.gz
wgEncodeBroadHistoneHuvecCtcfStdAlnRep0	HUVEC	CTCF	37412	spp.idrOptimal.bf.wgEncodeBroadHistoneHuvecCtcfStdAlnRep0.bam_VS_wgEncodeBroadHistoneHuvecControlStdAlnRep0.bam.narrowPeak.gz
wgEncodeOpenChromChipHuvecCtcfAlnRep0	HUVEC	CTCF	44033	spp.idrOptimal.bf.wgEncodeOpenChromChipHuvecCtcfAlnRep0.bam_VS_wgEncodeOpenChromChipHuvecInputAln.bam.narrowPeak.gz
wgEncodeUwTfbsHuvecCtcfStdAlnRep0	HUVEC	CTCF	37920	spp.idrOptimal.bf.wgEncodeUwTfbsHuvecCtcfStdAlnRep0.bam_VS_wgEncodeUwTfbsHuvecInputStdAlnRep1.bam.narrowPeak.gz
wgEncodeUwTfbsHvmfCtcfStdAlnRep0	HVMF	CTCF	46460	spp.idrOptimal.bf.wgEncodeUwTfbsHvmfCtcfStdAlnRep0.bam_VS_wgEncodeUwTfbsHvmfInputStdAlnRep1.bam.narrowPeak.gz
wgEncodeSydhTfbsImr90CtcfbIggrabAlnRep0	IMR90	CTCF	45920	spp.idrOptimal.bf.wgEncodeSydhTfbsImr90CtcfbIggrabAlnRep0.bam_VS_wgEncodeSydhTfbsImr90InputIggrabAlnRep1.bam.narrowPeak.gz
wgEncodeBroadHistoneK562CtcfStdAlnRep0	K562	CTCF	51992	spp.idrOptimal.bf.wgEncodeBroadHistoneK562CtcfStdAlnRep0.bam_VS_wgEncodeBroadHistoneK562ControlStdAlnRep1.bam.narrowPeak.gz
wgEncodeOpenChromChipK562CtcfAlnRep0	K562	CTCF	56058	spp.idrOptimal.bf.wgEncodeOpenChromChipK562CtcfAlnRep0.bam_VS_wgEncodeOpenChromChipK562InputAln.bam.narrowPeak.gz
wgEncodeUwTfbsK562CtcfStdAlnRep0	K562	CTCF	43247	spp.idrOptimal.bf.wgEncodeUwTfbsK562CtcfStdAlnRep0.bam_VS_wgEncodeUwTfbsK562InputStdAlnRep1.bam.narrowPeak.gz
wgEncodeSydhTfbsK562CtcfbIggrabAlnRep0	K562	CTCF	54387	spp.idrOptimal.bf.wgEncodeSydhTfbsK562CtcfbIggrabAlnRep0.bam_VS_wgEncodeSydhTfbsK562InputIggrabAln.bam.narrowPeak.gz
wgEncodeHaibTfbsK562CtcfcPcr1xAlnRep0V2	K562	CTCF	45603	spp.idrOptimal.bf.wgEncodeHaibTfbsK562CtcfcPcr1xAlnRep0V2.bam_VS_wgEncodeHaibTfbsK562RxlchPcr1xAlnRep0.bam.narrowPeak.gz
wgEncodeOpenChromChipMcf7CtcfEstroAlnRep0	MCF-7	CTCF	66592	spp.idrOptimal.bf.wgEncodeOpenChromChipMcf7CtcfEstroAlnRep0.bam_VS_wgEncodeOpenChromChipMcf7InputAln.bam.narrowPeak.gz
wgEncodeOpenChromChipMcf7CtcfAlnRep0	MCF-7	CTCF	57936	spp.idrOptimal.bf.wgEncodeOpenChromChipMcf7CtcfAlnRep0.bam_VS_wgEncodeOpenChromChipMcf7InputAln.bam.narrowPeak.gz
wgEncodeOpenChromChipMcf7CtcfSerumstvdAlnRep0	MCF-7	CTCF	54343	spp.idrOptimal.bf.wgEncodeOpenChromChipMcf7CtcfSerumstvdAlnRep0.bam_VS_wgEncodeOpenChromChipMcf7InputAln.bam.narrowPeak.gz
wgEncodeOpenChromChipMcf7CtcfSerumstimAlnRep0	MCF-7	CTCF	58608	spp.idrOptimal.bf.wgEncodeOpenChromChipMcf7CtcfSerumstimAlnRep0.bam_VS_wgEncodeOpenChromChipMcf7InputAln.bam.narrowPeak.gz
wgEncodeOpenChromChipMcf7CtcfVehAlnRep0	MCF-7	CTCF	82176	spp.idrOptimal.bf.wgEncodeOpenChromChipMcf7CtcfVehAlnRep0.bam_VS_wgEncodeOpenChromChipMcf7InputAln.bam.narrowPeak.gz
wgEncodeUwTfbsMcf7CtcfStdAlnRep0	MCF-7	CTCF	58994	spp.idrOptimal.bf.wgEncodeUwTfbsMcf7CtcfStdAlnRep0.bam_VS_wgEncodeUwTfbsMcf7InputStdAlnRep1.bam.narrowPeak.gz
wgEncodeUwTfbsNb4CtcfStdAlnRep1	NB4	CTCF	38253	spp.idrOptimal.bf.wgEncodeUwTfbsNb4CtcfStdAlnRep1.bam_VS_wgEncodeUwTfbsNb4InputStdAlnRep1.bam.narrowPeak.gz
wgEncodeBroadHistoneNhaCtcfStdAlnRep0	NH-A	CTCF	38474	spp.idrOptimal.bf.wgEncodeBroadHistoneNhaCtcfStdAlnRep0.bam_VS_wgEncodeBroadHistoneNhaControlStdAlnRep0.bam.narrowPeak.gz
wgEncodeBroadHistoneNhdfadCtcfStdAlnRep0	NHDF-Ad	CTCF	48995	spp.idrOptimal.bf.wgEncodeBroadHistoneNhdfadCtcfStdAlnRep0.bam_VS_wgEncodeBroadHistoneNhdfadControlStdAlnRep0.bam.narrowPeak.gz
wgEncodeUwTfbsNhdfneoCtcfStdAlnRep0	NHDF-neo	CTCF	45920	spp.idrOptimal.bf.wgEncodeUwTfbsNhdfneoCtcfStdAlnRep0.bam_VS_wgEncodeUwTfbsNhdfneoInputStdAlnRep1.bam.narrowPeak.gz
wgEncodeBroadHistoneNhekCtcfStdAlnRep0	NHEK	CTCF	47113	spp.idrOptimal.bf.wgEncodeBroadHistoneNhekCtcfStdAlnRep0.bam_VS_wgEncodeBroadHistoneNhekControlStdAlnRep0.bam.narrowPeak.gz
wgEncodeOpenChromChipNhekCtcfAlnRep0	NHEK	CTCF	53797	spp.idrOptimal.bf.wgEncodeOpenChromChipNhekCtcfAlnRep0.bam_VS_wgEncodeOpenChromChipGm12878InputAln.bam.narrowPeak.gz
wgEncodeUwTfbsNhekCtcfStdAlnRep0	NHEK	CTCF	42465	spp.idrOptimal.bf.wgEncodeUwTfbsNhekCtcfStdAlnRep0.bam_VS_wgEncodeUwTfbsNhekInputStdAlnRep1.bam.narrowPeak.gz
wgEncodeBroadHistoneNhlfCtcfStdAlnRep0	NHLF	CTCF	39537	spp.idrOptimal.bf.wgEncodeBroadHistoneNhlfCtcfStdAlnRep0.bam_VS_wgEncodeBroadHistoneNhlfControlStdAlnRep0.bam.narrowPeak.gz
wgEncodeUwTfbsNhlfCtcfStdAlnRep1	NHLF	CTCF	35446	spp.idrOptimal.bf.wgEncodeUwTfbsNhlfCtcfStdAlnRep1.bam_VS_wgEncodeUwTfbsNhlfInputStdAlnRep1.bam.narrowPeak.gz
wgEncodeBroadHistoneOsteoblCtcfStdAlnRep0	Osteobl	CTCF	56264	spp.idrOptimal.bf.wgEncodeBroadHistoneOsteoblCtcfStdAlnRep0.bam_VS_wgEncodeBroadHistoneOsteoblControlStdAlnRep0.bam.narrowPeak.gz
wgEncodeOpenChromChipProgfibCtcfAlnRep0	ProgFib	CTCF	43918	spp.idrOptimal.bf.wgEncodeOpenChromChipProgfibCtcfAlnRep0.bam_VS_wgEncodeOpenChromChipProgfibInputAln.bam.narrowPeak.gz
wgEncodeUwTfbsRptecCtcfStdAlnRep0	RPTEC	CTCF	58785	spp.idrOptimal.bf.wgEncodeUwTfbsRptecCtcfStdAlnRep0.bam_VS_wgEncodeUwTfbsRptecInputStdAlnRep1.bam.narrowPeak.gz
wgEncodeUwTfbsSaecCtcfStdAlnRep0	SAEC	CTCF	42446	spp.idrOptimal.bf.wgEncodeUwTfbsSaecCtcfStdAlnRep0.bam_VS_wgEncodeUwTfbsSaecInputStdAlnRep1.bam.narrowPeak.gz
wgEncodeHaibTfbsSknshraCtcfV0416102AlnRep0	SK-N-SH_RA	CTCF	40588	spp.idrOptimal.bf.wgEncodeHaibTfbsSknshraCtcfV0416102AlnRep0.bam_VS_wgEncodeHaibTfbsSknshraRxlchV0416102AlnRep1.bam.narrowPeak.gz
wgEncodeUwTfbsSknshraCtcfStdAlnRep0	SK-N-SH_RA	CTCF	46232	spp.idrOptimal.bf.wgEncodeUwTfbsSknshraCtcfStdAlnRep0.bam_VS_wgEncodeUwTfbsSknshraInputStdAlnRep1.bam.narrowPeak.gz
wgEncodeHaibTfbsT47dCtcfsc5916V0416102Dm002p1hAlnRep0	T-47D	CTCF	29285	spp.idrOptimal.bf.wgEncodeHaibTfbsT47dCtcfsc5916V0416102Dm002p1hAlnRep0.bam_VS_wgEncodeHaibTfbsT47dRxlchV0416102Dm002p1hAlnRep1.bam.narrowPeak.gz
wgEncodeUwTfbsWerirb1CtcfStdAlnRep0	WERI-Rb-1	CTCF	50308	spp.idrOptimal.bf.wgEncodeUwTfbsWerirb1CtcfStdAlnRep0.bam_VS_wgEncodeUwTfbsWerirb1InputStdAlnRep1.bam.narrowPeak.gz
wgEncodeUwTfbsWi38CtcfStdAlnRep0	WI-38	CTCF	31518	spp.idrOptimal.bf.wgEncodeUwTfbsWi38CtcfStdAlnRep0.bam_VS_wgEncodeUwTfbsWi38InputStdAlnRep1.bam.narrowPeak.gz
wgEncodeHaibTfbsK562Ctcflsc98982V0416101AlnRep0	K562	CTCFL	11533	spp.idrOptimal.bf.wgEncodeHaibTfbsK562Ctcflsc98982V0416101AlnRep0.bam_VS_wgEncodeHaibTfbsK562RxlchPcr1xAlnRep0.bam.narrowPeak.gz
wgEncodeSydhTfbsHelas3E2f1StdAlnRep0	HeLa-S3	E2F1	5116	spp.idrOptimal.bf.wgEncodeSydhTfbsHelas3E2f1StdAlnRep0.bam_VS_wgEncodeSydhTfbsHelas3InputStdAlnRep1.bam.narrowPeak.gz
wgEncodeSydhTfbsHelas3Hae2f1StdAlnRep0	HeLa-S3	E2F1	10283	spp.idrOptimal.bf.wgEncodeSydhTfbsHelas3Hae2f1StdAlnRep0.bam_VS_wgEncodeSydhTfbsHelas3InputStdAlnRep1.bam.narrowPeak.gz
wgEncodeSydhTfbsMcf7Hae2f1UcdAlnRep0	MCF-7	E2F1	21946	spp.idrOptimal.bf.wgEncodeSydhTfbsMcf7Hae2f1UcdAlnRep0.bam_VS_wgEncodeSydhTfbsMcf7InputUcdAlnRep0.bam.narrowPeak.gz
wgEncodeSydhTfbsGm12878E2f4IggmusAlnRep0	GM12878	E2F4	3440	spp.idrOptimal.bf.wgEncodeSydhTfbsGm12878E2f4IggmusAlnRep0.bam_VS_wgEncodeSydhTfbsGm12878InputIggmusAlnRep0.bam.narrowPeak.gz
wgEncodeSydhTfbsHelas3E2f4StdAlnRep0	HeLa-S3	E2F4	2831	spp.idrOptimal.bf.wgEncodeSydhTfbsHelas3E2f4StdAlnRep0.bam_VS_wgEncodeSydhTfbsHelas3InputStdAlnRep1.bam.narrowPeak.gz
wgEncodeSydhTfbsK562E2f4UcdAlnRep0	K562	E2F4	8181	spp.idrOptimal.bf.wgEncodeSydhTfbsK562E2f4UcdAlnRep0.bam_VS_wgEncodeSydhTfbsK562InputUcdAlnRep1.bam.narrowPeak.gz
wgEncodeSydhTfbsMcf10aesE2f4TamHvdAlnRep0	MCF10A-Er-Src	E2F4	15516	spp.idrOptimal.bf.wgEncodeSydhTfbsMcf10aesE2f4TamHvdAlnRep0.bam_VS_wgEncodeSydhTfbsMcf10aesInputHvdAlnRep1.bam.narrowPeak.gz
wgEncodeSydhTfbsHelas3E2f6StdAlnRep0	HeLa-S3	E2F6	4775	spp.idrOptimal.bf.wgEncodeSydhTfbsHelas3E2f6StdAlnRep0.bam_VS_wgEncodeSydhTfbsHelas3InputStdAlnRep1.bam.narrowPeak.gz
wgEncodeHaibTfbsK562E2f6V0416102AlnRep0	K562	E2F6	24570	spp.idrOptimal.bf.wgEncodeHaibTfbsK562E2f6V0416102AlnRep0.bam_VS_wgEncodeHaibTfbsK562RxlchPcr1xAlnRep0.bam.narrowPeak.gz
wgEncodeSydhTfbsK562E2f6UcdAlnRep0	K562	E2F6	16312	spp.idrOptimal.bf.wgEncodeSydhTfbsK562E2f6UcdAlnRep0.bam_VS_wgEncodeSydhTfbsK562InputUcdAlnRep1.bam.narrowPeak.gz
wgEncodeHaibTfbsGm12878Ebf1sc137065Pcr1xAlnRep0	GM12878	EBF1	36140	spp.idrOptimal.bf.wgEncodeHaibTfbsGm12878Ebf1sc137065Pcr1xAlnRep0.bam_VS_wgEncodeHaibTfbsGm12878RxlchPcr1xAlnRep0.bam.narrowPeak.gz
wgEncodeSydhTfbsGm12878Ebf1sc137065StdAlnRep0	GM12878	EBF1	33410	spp.idrOptimal.bf.wgEncodeSydhTfbsGm12878Ebf1sc137065StdAlnRep0.bam_VS_wgEncodeSydhTfbsGm12878InputStdAlnRep1.bam.narrowPeak.gz
wgEncodeHaibTfbsGm12878Egr1Pcr2xAlnRep0	GM12878	EGR1	16331	spp.idrOptimal.bf.wgEncodeHaibTfbsGm12878Egr1Pcr2xAlnRep0.bam_VS_wgEncodeHaibTfbsGm12878RxlchPcr1xAlnRep0.bam.narrowPeak.gz
wgEncodeHaibTfbsH1hescEgr1V0416102AlnRep0	H1-hESC	EGR1	8743	spp.idrOptimal.bf.wgEncodeHaibTfbsH1hescEgr1V0416102AlnRep0.bam_VS_wgEncodeHaibTfbsH1hescRxlchPcr1xAlnRep0.bam.narrowPeak.gz
wgEncodeHaibTfbsK562Egr1V0416101AlnRep0	K562	EGR1	36997	spp.idrOptimal.bf.wgEncodeHaibTfbsK562Egr1V0416101AlnRep0.bam_VS_wgEncodeHaibTfbsK562RxlchPcr1xAlnRep0.bam.narrowPeak.gz
wgEncodeHaibTfbsA549Elf1V0422111Etoh02AlnRep0	A549	ELF1	8611	spp.idrOptimal.bf.wgEncodeHaibTfbsA549Elf1V0422111Etoh02AlnRep0.bam_VS_wgEncodeHaibTfbsA549RxlchPcr1xEtoh02AlnRep0.bam.narrowPeak.gz
wgEncodeHaibTfbsGm12878Elf1sc631V0416101AlnRep0	GM12878	ELF1	23008	spp.idrOptimal.bf.wgEncodeHaibTfbsGm12878Elf1sc631V0416101AlnRep0.bam_VS_wgEncodeHaibTfbsGm12878RxlchPcr1xAlnRep0.bam.narrowPeak.gz
wgEncodeHaibTfbsHepg2Elf1sc631V0416101AlnRep0	HepG2	ELF1	18001	spp.idrOptimal.bf.wgEncodeHaibTfbsHepg2Elf1sc631V0416101AlnRep0.bam_VS_wgEncodeHaibTfbsHepg2RxlchPcr1xAlnRep0.bam.narrowPeak.gz
wgEncodeUchicagoTfbsK562Elf1Controlelf1AlnRep0	K562	ELF1	1868	spp.idrOptimal.bf.wgEncodeUchicagoTfbsK562Elf1Controlelf1AlnRep0.bam_VS_wgEncodeUchicagoTfbsK562InputControlelf1AlnRep1.bam.narrowPeak.gz
wgEncodeHaibTfbsK562Elf1sc631V0416102AlnRep0	K562	ELF1	27780	spp.idrOptimal.bf.wgEncodeHaibTfbsK562Elf1sc631V0416102AlnRep0.bam_VS_wgEncodeHaibTfbsK562RxlchPcr1xAlnRep0.bam.narrowPeak.gz
wgEncodeSydhTfbsGm12878Elk112771IggmusAlnRep0	GM12878	ELK1	5584	spp.idrOptimal.bf.wgEncodeSydhTfbsGm12878Elk112771IggmusAlnRep0.bam_VS_wgEncodeSydhTfbsGm12878InputIggmusAlnRep0.bam.narrowPeak.gz
wgEncodeSydhTfbsHelas3Elk112771IggrabAlnRep0	HeLa-S3	ELK1	4809	spp.idrOptimal.bf.wgEncodeSydhTfbsHelas3Elk112771IggrabAlnRep0.bam_VS_wgEncodeSydhTfbsHelas3InputIggrabAlnRep1.bam.narrowPeak.gz
wgEncodeSydhTfbsK562Elk112771IggrabAlnRep0	K562	ELK1	2961	spp.idrOptimal.bf.wgEncodeSydhTfbsK562Elk112771IggrabAlnRep0.bam_VS_wgEncodeSydhTfbsK562InputIggrabAln.bam.narrowPeak.gz
wgEncodeSydhTfbsHek293Elk4UcdAlnRep0	HEK293	ELK4	1375	spp.idrOptimal.bf.wgEncodeSydhTfbsHek293Elk4UcdAlnRep0.bam_VS_wgEncodeSydhTfbsHek293InputUcdAln.bam.narrowPeak.gz
wgEncodeSydhTfbsHelas3Elk4UcdAlnRep0	HeLa-S3	ELK4	5916	spp.idrOptimal.bf.wgEncodeSydhTfbsHelas3Elk4UcdAlnRep0.bam_VS_wgEncodeSydhTfbsHelas3InputUcdAln.bam.narrowPeak.gz
wgEncodeHaibTfbsA549P300V0422111Etoh02AlnRep0	A549	EP300	18216	spp.idrOptimal.bf.wgEncodeHaibTfbsA549P300V0422111Etoh02AlnRep0.bam_VS_wgEncodeHaibTfbsA549RxlchPcr1xEtoh02AlnRep0.bam.narrowPeak.gz
wgEncodeHaibTfbsGm12878P300Pcr1xAlnRep0	GM12878	EP300	5168	spp.idrOptimal.bf.wgEncodeHaibTfbsGm12878P300Pcr1xAlnRep0.bam_VS_wgEncodeHaibTfbsGm12878RxlchPcr1xAlnRep0.bam.narrowPeak.gz
wgEncodeSydhTfbsGm12878P300IggmusAlnRep0	GM12878	EP300	17461	spp.idrOptimal.bf.wgEncodeSydhTfbsGm12878P300IggmusAlnRep0.bam_VS_wgEncodeSydhTfbsGm12878InputIggmusAlnRep0.bam.narrowPeak.gz
wgEncodeSydhTfbsGm12878P300bStdAlnRep0	GM12878	EP300	6189	spp.idrOptimal.bf.wgEncodeSydhTfbsGm12878P300bStdAlnRep0.bam_VS_wgEncodeSydhTfbsGm12878InputStdAlnRep1.bam.narrowPeak.gz
wgEncodeHaibTfbsH1hescP300V0416102AlnRep0	H1-hESC	EP300	8934	spp.idrOptimal.bf.wgEncodeHaibTfbsH1hescP300V0416102AlnRep0.bam_VS_wgEncodeHaibTfbsH1hescRxlchPcr1xAlnRep0.bam.narrowPeak.gz
wgEncodeSydhTfbsHelas3P300sc584sc584IggrabAlnRep0	HeLa-S3	EP300	25854	spp.idrOptimal.bf.wgEncodeSydhTfbsHelas3P300sc584sc584IggrabAlnRep0.bam_VS_wgEncodeSydhTfbsHelas3InputIggrabAlnRep1.bam.narrowPeak.gz
wgEncodeHaibTfbsHepg2P300V0416101AlnRep0	HepG2	EP300	27913	spp.idrOptimal.bf.wgEncodeHaibTfbsHepg2P300V0416101AlnRep0.bam_VS_wgEncodeHaibTfbsHepg2RxlchPcr1xAlnRep0.bam.narrowPeak.gz
wgEncodeSydhTfbsHepg2P300sc582IggrabAlnRep0	HepG2	EP300	6613	spp.idrOptimal.bf.wgEncodeSydhTfbsHepg2P300sc582IggrabAlnRep0.bam_VS_wgEncodeSydhTfbsHepg2InputIggrabAln.bam.narrowPeak.gz
wgEncodeBroadHistoneK562P300StdAlnRep0	K562	EP300	2674	spp.idrOptimal.bf.wgEncodeBroadHistoneK562P300StdAlnRep0.bam_VS_wgEncodeBroadHistoneK562ControlStdAlnRep1.bam.narrowPeak.gz
wgEncodeSydhTfbsK562P300IggrabAlnRep0	K562	EP300	25881	spp.idrOptimal.bf.wgEncodeSydhTfbsK562P300IggrabAlnRep0.bam_VS_wgEncodeSydhTfbsK562InputIggrabAln.bam.narrowPeak.gz
wgEncodeHaibTfbsSknshraP300V0416102AlnRep0	SK-N-SH_RA	EP300	46485	spp.idrOptimal.bf.wgEncodeHaibTfbsSknshraP300V0416102AlnRep0.bam_VS_wgEncodeHaibTfbsSknshraRxlchV0416102AlnRep1.bam.narrowPeak.gz
wgEncodeHaibTfbsT47dP300V0416102Dm002p1hAlnRep0	T-47D	EP300	13973	spp.idrOptimal.bf.wgEncodeHaibTfbsT47dP300V0416102Dm002p1hAlnRep0.bam_VS_wgEncodeHaibTfbsT47dRxlchV0416102Dm002p1hAlnRep1.bam.narrowPeak.gz
wgEncodeHaibTfbsEcc1EraaV0416102Bpa1hAlnRep0	ECC-1	ESR1	4260	spp.idrOptimal.bf.wgEncodeHaibTfbsEcc1EraaV0416102Bpa1hAlnRep0.bam_VS_wgEncodeHaibTfbsEcc1EralphaaV0416102Dm002p1hAlnRep0.bam.narrowPeak.gz
wgEncodeHaibTfbsEcc1EralphaaV0416102Est10nm1hAlnRep0	ECC-1	ESR1	16091	spp.idrOptimal.bf.wgEncodeHaibTfbsEcc1EralphaaV0416102Est10nm1hAlnRep0.bam_VS_wgEncodeHaibTfbsEcc1EralphaaV0416102Dm002p1hAlnRep0.bam.narrowPeak.gz
wgEncodeHaibTfbsEcc1EralphaaV0416102Gen1hAlnRep0	ECC-1	ESR1	11452	spp.idrOptimal.bf.wgEncodeHaibTfbsEcc1EralphaaV0416102Gen1hAlnRep0.bam_VS_wgEncodeHaibTfbsEcc1EralphaaV0416102Dm002p1hAlnRep0.bam.narrowPeak.gz
wgEncodeUchicagoTfbsK562EsrControlesrAlnRep0	K562	ESR1	355	spp.idrOptimal.bf.wgEncodeUchicagoTfbsK562EsrControlesrAlnRep0.bam_VS_wgEncodeUchicagoTfbsK562InputControlesrAlnRep1.bam.narrowPeak.gz
wgEncodeHaibTfbsT47dEraaV0416102Bpa1hAlnRep0	T-47D	ESR1	3902	spp.idrOptimal.bf.wgEncodeHaibTfbsT47dEraaV0416102Bpa1hAlnRep0.bam_VS_wgEncodeHaibTfbsT47dEralphaaV0416102Dm002p1hAlnRep0.bam.narrowPeak.gz
wgEncodeHaibTfbsT47dEralphaaV0416102Est10nm1hAlnRep0	T-47D	ESR1	10505	spp.idrOptimal.bf.wgEncodeHaibTfbsT47dEralphaaV0416102Est10nm1hAlnRep0.bam_VS_wgEncodeHaibTfbsT47dEralphaaV0416102Dm002p1hAlnRep0.bam.narrowPeak.gz
wgEncodeHaibTfbsT47dEralphaaPcr2xGen1hAlnRep0	T-47D	ESR1	10547	spp.idrOptimal.bf.wgEncodeHaibTfbsT47dEralphaaPcr2xGen1hAlnRep0.bam_VS_wgEncodeHaibTfbsT47dEralphaaV0416102Dm002p1hAlnRep0.bam.narrowPeak.gz
wgEncodeSydhTfbsHepg2ErraForsklnStdAlnRep0	HepG2	ESRRA	1177	spp.idrOptimal.bf.wgEncodeSydhTfbsHepg2ErraForsklnStdAlnRep0.bam_VS_wgEncodeSydhTfbsHepg2InputForsklnStdAlnRep0.bam.narrowPeak.gz
wgEncodeHaibTfbsA549Ets1V0422111Etoh02AlnRep0	A549	ETS1	5525	spp.idrOptimal.bf.wgEncodeHaibTfbsA549Ets1V0422111Etoh02AlnRep0.bam_VS_wgEncodeHaibTfbsA549RxlchPcr1xEtoh02AlnRep0.bam.narrowPeak.gz
wgEncodeHaibTfbsGm12878Ets1Pcr1xAlnRep0	GM12878	ETS1	4120	spp.idrOptimal.bf.wgEncodeHaibTfbsGm12878Ets1Pcr1xAlnRep0.bam_VS_wgEncodeHaibTfbsGm12878RxlchPcr1xAlnRep0.bam.narrowPeak.gz
wgEncodeHaibTfbsK562Ets1V0416101AlnRep0	K562	ETS1	10726	spp.idrOptimal.bf.wgEncodeHaibTfbsK562Ets1V0416101AlnRep0.bam_VS_wgEncodeHaibTfbsK562RxlchPcr1xAlnRep0.bam.narrowPeak.gz
wgEncodeBroadHistoneDnd41Ezh239875AlnRep0	Dnd41	EZH2	1732	spp.idrOptimal.bf.wgEncodeBroadHistoneDnd41Ezh239875AlnRep0.bam_VS_wgEncodeBroadHistoneDnd41ControlStdAlnRep0.bam.narrowPeak.gz
wgEncodeBroadHistoneGm12878Ezh239875AlnRep0	GM12878	EZH2	2472	spp.idrOptimal.bf.wgEncodeBroadHistoneGm12878Ezh239875AlnRep0.bam_VS_wgEncodeBroadHistoneGm12878ControlStdAlnRep0.bam.narrowPeak.gz
wgEncodeBroadHistoneH1hescEzh239875AlnRep0	H1-hESC	EZH2	6370	spp.idrOptimal.bf.wgEncodeBroadHistoneH1hescEzh239875AlnRep0.bam_VS_wgEncodeBroadHistoneH1hescControlStdAlnRep0.bam.narrowPeak.gz
wgEncodeBroadHistoneHelas3Ezh239875AlnRep0	HeLa-S3	EZH2	1818	spp.idrOptimal.bf.wgEncodeBroadHistoneHelas3Ezh239875AlnRep0.bam_VS_wgEncodeBroadHistoneHelas3ControlStdAlnRep0.bam.narrowPeak.gz
wgEncodeBroadHistoneHepg2Ezh239875AlnRep0	HepG2	EZH2	3286	spp.idrOptimal.bf.wgEncodeBroadHistoneHepg2Ezh239875AlnRep0.bam_VS_wgEncodeBroadHistoneHepg2ControlStdAlnRep0.bam.narrowPeak.gz
wgEncodeBroadHistoneHmecEzh239875AlnRep0	HMEC	EZH2	4626	spp.idrOptimal.bf.wgEncodeBroadHistoneHmecEzh239875AlnRep0.bam_VS_wgEncodeBroadHistoneHmecControlStdAlnRep0.bam.narrowPeak.gz
wgEncodeBroadHistoneHsmmEzh239875AlnRep0	HSMM	EZH2	1540	spp.idrOptimal.bf.wgEncodeBroadHistoneHsmmEzh239875AlnRep0.bam_VS_wgEncodeBroadHistoneHsmmControlStdAlnRep0.bam.narrowPeak.gz
wgEncodeBroadHistoneHsmmtEzh239875AlnRep0	HSMMtube	EZH2	2700	spp.idrOptimal.bf.wgEncodeBroadHistoneHsmmtEzh239875AlnRep0.bam_VS_wgEncodeBroadHistoneHsmmtControlStdAlnRep0.bam.narrowPeak.gz
wgEncodeBroadHistoneHuvecEzh239875AlnRep0	HUVEC	EZH2	6234	spp.idrOptimal.bf.wgEncodeBroadHistoneHuvecEzh239875AlnRep0.bam_VS_wgEncodeBroadHistoneHuvecControlStdAlnRep0.bam.narrowPeak.gz
wgEncodeBroadHistoneK562Ezh239875StdAlnRep0	K562	EZH2	1685	spp.idrOptimal.bf.wgEncodeBroadHistoneK562Ezh239875StdAlnRep0.bam_VS_wgEncodeBroadHistoneK562ControlStdAlnRep1.bam.narrowPeak.gz
wgEncodeBroadHistoneNhaEzh239875AlnRep0	NH-A	EZH2	6493	spp.idrOptimal.bf.wgEncodeBroadHistoneNhaEzh239875AlnRep0.bam_VS_wgEncodeBroadHistoneNhaControlStdAlnRep0.bam.narrowPeak.gz
wgEncodeBroadHistoneNhdfadEzh239875AlnRep0	NHDF-Ad	EZH2	5739	spp.idrOptimal.bf.wgEncodeBroadHistoneNhdfadEzh239875AlnRep0.bam_VS_wgEncodeBroadHistoneNhdfadControlStdAlnRep0.bam.narrowPeak.gz
wgEncodeBroadHistoneNhekEzh239875AlnRep0	NHEK	EZH2	7978	spp.idrOptimal.bf.wgEncodeBroadHistoneNhekEzh239875AlnRep0.bam_VS_wgEncodeBroadHistoneNhekControlStdAlnRep0.bam.narrowPeak.gz
wgEncodeBroadHistoneNhlfEzh239875AlnRep0	NHLF	EZH2	7030	spp.idrOptimal.bf.wgEncodeBroadHistoneNhlfEzh239875AlnRep0.bam_VS_wgEncodeBroadHistoneNhlfControlStdAlnRep0.bam.narrowPeak.gz
wgEncodeSydhTfbsGm12878Spt20StdAlnRep0	GM12878	FAM48A	15	spp.idrOptimal.bf.wgEncodeSydhTfbsGm12878Spt20StdAlnRep0.bam_VS_wgEncodeSydhTfbsGm12878InputStdAlnRep1.bam.narrowPeak.gz
wgEncodeSydhTfbsHelas3Spt20StdAlnRep0	HeLa-S3	FAM48A	4088	spp.idrOptimal.bf.wgEncodeSydhTfbsHelas3Spt20StdAlnRep0.bam_VS_wgEncodeSydhTfbsHelas3InputStdAlnRep1.bam.narrowPeak.gz
wgEncodeSydhTfbsGm12878CfosStdAlnRep0	GM12878	FOS	2239	spp.idrOptimal.bf.wgEncodeSydhTfbsGm12878CfosStdAlnRep0.bam_VS_wgEncodeSydhTfbsGm12878InputStdAlnRep1.bam.narrowPeak.gz
wgEncodeSydhTfbsHelas3CfosStdAlnRep0	HeLa-S3	FOS	9325	spp.idrOptimal.bf.wgEncodeSydhTfbsHelas3CfosStdAlnRep0.bam_VS_wgEncodeSydhTfbsHelas3InputStdAlnRep1.bam.narrowPeak.gz
wgEncodeSydhTfbsHuvecCfosUcdAlnRep0	HUVEC	FOS	46726	spp.idrOptimal.bf.wgEncodeSydhTfbsHuvecCfosUcdAlnRep0.bam_VS_wgEncodeSydhTfbsHuvecInputUcdAlnRep1.bam.narrowPeak.gz
wgEncodeSydhTfbsK562CfosStdAlnRep0	K562	FOS	7646	spp.idrOptimal.bf.wgEncodeSydhTfbsK562CfosStdAlnRep0.bam_VS_wgEncodeSydhTfbsK562InputStdAlnRep0.bam.narrowPeak.gz
wgEncodeUchicagoTfbsK562EfosControlAlnRep0	K562	FOS	10256	spp.idrOptimal.bf.wgEncodeUchicagoTfbsK562EfosControlAlnRep0.bam_VS_wgEncodeUchicagoTfbsK562InputControlfosAlnRep0.bam.narrowPeak.gz
wgEncodeSydhTfbsMcf10aesCfosTam112hHvdAlnRep0	MCF10A-Er-Src	FOS	92358	spp.idrOptimal.bf.wgEncodeSydhTfbsMcf10aesCfosTam112hHvdAlnRep0.bam_VS_wgEncodeSydhTfbsMcf10aesInputHvdAlnRep1.bam.narrowPeak.gz
wgEncodeSydhTfbsMcf10aesCfosTamHvdAlnRep0	MCF10A-Er-Src	FOS	70462	spp.idrOptimal.bf.wgEncodeSydhTfbsMcf10aesCfosTamHvdAlnRep0.bam_VS_wgEncodeSydhTfbsMcf10aesInputHvdAlnRep1.bam.narrowPeak.gz
wgEncodeSydhTfbsMcf10aesCfosTam14hHvdAlnRep0	MCF10A-Er-Src	FOS	86323	spp.idrOptimal.bf.wgEncodeSydhTfbsMcf10aesCfosTam14hHvdAlnRep0.bam_VS_wgEncodeSydhTfbsMcf10aesInputHvdAlnRep1.bam.narrowPeak.gz
wgEncodeSydhTfbsMcf10aesCfosEtoh01HvdAlnRep0	MCF10A-Er-Src	FOS	67918	spp.idrOptimal.bf.wgEncodeSydhTfbsMcf10aesCfosEtoh01HvdAlnRep0.bam_VS_wgEncodeSydhTfbsMcf10aesInputHvdAlnRep1.bam.narrowPeak.gz
wgEncodeHaibTfbsH1hescFosl1sc183V0416102AlnRep0	H1-hESC	FOSL1	1113	spp.idrOptimal.bf.wgEncodeHaibTfbsH1hescFosl1sc183V0416102AlnRep0.bam_VS_wgEncodeHaibTfbsH1hescRxlchPcr1xAlnRep0.bam.narrowPeak.gz
wgEncodeHaibTfbsK562Fosl1sc183V0416101AlnRep0	K562	FOSL1	11174	spp.idrOptimal.bf.wgEncodeHaibTfbsK562Fosl1sc183V0416101AlnRep0.bam_VS_wgEncodeHaibTfbsK562RxlchPcr1xAlnRep0.bam.narrowPeak.gz
wgEncodeHaibTfbsA549Fosl2V0422111Etoh02AlnRep0	A549	FOSL2	28756	spp.idrOptimal.bf.wgEncodeHaibTfbsA549Fosl2V0422111Etoh02AlnRep0.bam_VS_wgEncodeHaibTfbsA549RxlchPcr1xEtoh02AlnRep0.bam.narrowPeak.gz
wgEncodeHaibTfbsHepg2Fosl2V0416101AlnRep0	HepG2	FOSL2	25211	spp.idrOptimal.bf.wgEncodeHaibTfbsHepg2Fosl2V0416101AlnRep0.bam_VS_wgEncodeHaibTfbsHepg2RxlchPcr1xAlnRep0.bam.narrowPeak.gz
wgEncodeHaibTfbsA549Foxa1V0416102Dex100nmAlnRep0	A549	FOXA1	7695	spp.idrOptimal.bf.wgEncodeHaibTfbsA549Foxa1V0416102Dex100nmAlnRep0.bam_VS_wgEncodeHaibTfbsA549Foxa1V0416102Etoh02AlnRep0.bam.narrowPeak.gz
wgEncodeHaibTfbsEcc1Foxa1sc6553V0416102Dm002p1hAlnRep0	ECC-1	FOXA1	5892	spp.idrOptimal.bf.wgEncodeHaibTfbsEcc1Foxa1sc6553V0416102Dm002p1hAlnRep0.bam_VS_wgEncodeHaibTfbsEcc1RxlchV0416102Dm002p1hAlnRep1.bam.narrowPeak.gz
wgEncodeHaibTfbsHepg2Foxa1sc101058V0416101AlnRep0	HepG2	FOXA1	43114	spp.idrOptimal.bf.wgEncodeHaibTfbsHepg2Foxa1sc101058V0416101AlnRep0.bam_VS_wgEncodeHaibTfbsHepg2RxlchPcr1xAlnRep0.bam.narrowPeak.gz
wgEncodeHaibTfbsHepg2Foxa1sc6553V0416101AlnRep0	HepG2	FOXA1	51264	spp.idrOptimal.bf.wgEncodeHaibTfbsHepg2Foxa1sc6553V0416101AlnRep0.bam_VS_wgEncodeHaibTfbsHepg2RxlchPcr1xAlnRep0.bam.narrowPeak.gz
wgEncodeHaibTfbsT47dFoxa1sc6553V0416102Dm002p1hAlnRep0	T-47D	FOXA1	41555	spp.idrOptimal.bf.wgEncodeHaibTfbsT47dFoxa1sc6553V0416102Dm002p1hAlnRep0.bam_VS_wgEncodeHaibTfbsT47dRxlchV0416102Dm002p1hAlnRep1.bam.narrowPeak.gz
wgEncodeHaibTfbsHepg2Foxa2sc6554V0416101AlnRep0	HepG2	FOXA2	40989	spp.idrOptimal.bf.wgEncodeHaibTfbsHepg2Foxa2sc6554V0416101AlnRep0.bam_VS_wgEncodeHaibTfbsHepg2RxlchPcr1xAlnRep0.bam.narrowPeak.gz
wgEncodeHaibTfbsGm12878Foxm1sc502V0422111AlnRep0	GM12878	FOXM1	22926	spp.idrOptimal.bf.wgEncodeHaibTfbsGm12878Foxm1sc502V0422111AlnRep0.bam_VS_wgEncodeHaibTfbsGm12878ControlV0422111AlnRep0.bam.narrowPeak.gz
wgEncodeHaibTfbsPfsk1Foxp2Pcr2xAlnRep0	PFSK-1	FOXP2	18182	spp.idrOptimal.bf.wgEncodeHaibTfbsPfsk1Foxp2Pcr2xAlnRep0.bam_VS_wgEncodeHaibTfbsPfsk1RxlchPcr2xAlnRep0.bam.narrowPeak.gz
wgEncodeHaibTfbsSknmcFoxp2Pcr2xAlnRep0	SK-N-MC	FOXP2	14695	spp.idrOptimal.bf.wgEncodeHaibTfbsSknmcFoxp2Pcr2xAlnRep0.bam_VS_wgEncodeHaibTfbsSknmcRxlchPcr2xAlnRep0.bam.narrowPeak.gz
wgEncodeHaibTfbsA549GabpV0422111Etoh02AlnRep0	A549	GABPB1	12348	spp.idrOptimal.bf.wgEncodeHaibTfbsA549GabpV0422111Etoh02AlnRep0.bam_VS_wgEncodeHaibTfbsA549RxlchPcr1xEtoh02AlnRep0.bam.narrowPeak.gz
wgEncodeHaibTfbsGm12878GabpPcr2xAlnRep0	GM12878	GABPB1	6566	spp.idrOptimal.bf.wgEncodeHaibTfbsGm12878GabpPcr2xAlnRep0.bam_VS_wgEncodeHaibTfbsGm12878RxlchPcr1xAlnRep0.bam.narrowPeak.gz
wgEncodeHaibTfbsH1hescGabpPcr1xAlnRep0	H1-hESC	GABPB1	5653	spp.idrOptimal.bf.wgEncodeHaibTfbsH1hescGabpPcr1xAlnRep0.bam_VS_wgEncodeHaibTfbsH1hescRxlchPcr1xAlnRep0.bam.narrowPeak.gz
wgEncodeHaibTfbsHelas3GabpPcr1xAlnRep0	HeLa-S3	GABPB1	6761	spp.idrOptimal.bf.wgEncodeHaibTfbsHelas3GabpPcr1xAlnRep0.bam_VS_wgEncodeHaibTfbsHelas3RxlchPcr1xAlnRep1.bam.narrowPeak.gz
wgEncodeHaibTfbsHepg2GabpPcr2xAlnRep0	HepG2	GABPB1	10109	spp.idrOptimal.bf.wgEncodeHaibTfbsHepg2GabpPcr2xAlnRep0.bam_VS_wgEncodeHaibTfbsHepg2RxlchPcr1xAlnRep0.bam.narrowPeak.gz
wgEncodeHaibTfbsK562GabpV0416101AlnRep0	K562	GABPB1	14393	spp.idrOptimal.bf.wgEncodeHaibTfbsK562GabpV0416101AlnRep0.bam_VS_wgEncodeHaibTfbsK562RxlchPcr1xAlnRep0.bam.narrowPeak.gz
wgEncodeSydhTfbsK562Gata1UcdAlnRep0	K562	GATA1	4074	spp.idrOptimal.bf.wgEncodeSydhTfbsK562Gata1UcdAlnRep0.bam_VS_wgEncodeSydhTfbsK562InputUcdAlnRep1.bam.narrowPeak.gz
wgEncodeSydhTfbsPbdeGata1UcdAlnRep0	PBDE	GATA1	25001	spp.idrOptimal.bf.wgEncodeSydhTfbsPbdeGata1UcdAlnRep0.bam_VS_wgEncodeSydhTfbsPbdeInputUcdAln.bam.narrowPeak.gz
wgEncodeSydhTfbsPbdefetalGata1UcdAlnRep0	PBDEFetal	GATA1	2157	spp.idrOptimal.bf.wgEncodeSydhTfbsPbdefetalGata1UcdAlnRep0.bam_VS_wgEncodeSydhTfbsPbdefetalInputUcdAln.bam.narrowPeak.gz
wgEncodeSydhTfbsHuvecGata2UcdAlnRep0	HUVEC	GATA2	27454	spp.idrOptimal.bf.wgEncodeSydhTfbsHuvecGata2UcdAlnRep0.bam_VS_wgEncodeSydhTfbsHuvecInputUcdAlnRep1.bam.narrowPeak.gz
wgEncodeUchicagoTfbsK562Egata2ControlAlnRep0	K562	GATA2	11478	spp.idrOptimal.bf.wgEncodeUchicagoTfbsK562Egata2ControlAlnRep0.bam_VS_wgEncodeUchicagoTfbsK562InputControlgata2AlnRep0.bam.narrowPeak.gz
wgEncodeSydhTfbsK562Gata2UcdAlnRep0	K562	GATA2	10648	spp.idrOptimal.bf.wgEncodeSydhTfbsK562Gata2UcdAlnRep0.bam_VS_wgEncodeSydhTfbsK562InputUcdAlnRep1.bam.narrowPeak.gz
wgEncodeHaibTfbsK562Gata2sc267Pcr1xAlnRep0	K562	GATA2	19322	spp.idrOptimal.bf.wgEncodeHaibTfbsK562Gata2sc267Pcr1xAlnRep0.bam_VS_wgEncodeHaibTfbsK562RxlchPcr1xAlnRep0.bam.narrowPeak.gz
wgEncodeSydhTfbsShsy5yGata2UcdAlnRep0	SH-SY5Y	GATA2	35620	spp.idrOptimal.bf.wgEncodeSydhTfbsShsy5yGata2UcdAlnRep0.bam_VS_wgEncodeSydhTfbsShsy5yInputUcdAln.bam.narrowPeak.gz
wgEncodeSydhTfbsMcf7Gata3UcdAlnRep0	MCF-7	GATA3	6081	spp.idrOptimal.bf.wgEncodeSydhTfbsMcf7Gata3UcdAlnRep0.bam_VS_wgEncodeSydhTfbsMcf7InputUcdAlnRep0.bam.narrowPeak.gz
wgEncodeSydhTfbsMcf7Gata3sc269UcdAlnRep0	MCF-7	GATA3	12077	spp.idrOptimal.bf.wgEncodeSydhTfbsMcf7Gata3sc269UcdAlnRep0.bam_VS_wgEncodeSydhTfbsMcf7InputUcdAlnRep0.bam.narrowPeak.gz
wgEncodeSydhTfbsShsy5yGata3sc269sc269UcdAlnRep0	SH-SY5Y	GATA3	15879	spp.idrOptimal.bf.wgEncodeSydhTfbsShsy5yGata3sc269sc269UcdAlnRep0.bam_VS_wgEncodeSydhTfbsShsy5yInputUcdAln.bam.narrowPeak.gz
wgEncodeHaibTfbsT47dGata3sc268V0416102Dm002p1hAlnRep0	T-47D	GATA3	37199	spp.idrOptimal.bf.wgEncodeHaibTfbsT47dGata3sc268V0416102Dm002p1hAlnRep0.bam_VS_wgEncodeHaibTfbsT47dRxlchV0416102Dm002p1hAlnRep1.bam.narrowPeak.gz
wgEncodeSydhTfbsHelas3Tf3c110StdAlnRep0	HeLa-S3	GTF2B	2616	spp.idrOptimal.bf.wgEncodeSydhTfbsHelas3Tf3c110StdAlnRep0.bam_VS_wgEncodeSydhTfbsHelas3InputStdAlnRep1.bam.narrowPeak.gz
wgEncodeSydhTfbsK562Gtf2bStdAlnRep0	K562	GTF2B	2928	spp.idrOptimal.bf.wgEncodeSydhTfbsK562Gtf2bStdAlnRep0.bam_VS_wgEncodeSydhTfbsK562InputStdAlnRep0.bam.narrowPeak.gz
wgEncodeSydhTfbsK562Tf3c110StdAlnRep0	K562	GTF2B	1858	spp.idrOptimal.bf.wgEncodeSydhTfbsK562Tf3c110StdAlnRep0.bam_VS_wgEncodeSydhTfbsK562InputStdAlnRep0.bam.narrowPeak.gz
wgEncodeSydhTfbsH1hescGtf2f1IggrabAlnRep0	H1-hESC	GTF2F1	3548	spp.idrOptimal.bf.wgEncodeSydhTfbsH1hescGtf2f1IggrabAlnRep0.bam_VS_wgEncodeSydhTfbsH1hescInputIggrabAln.bam.narrowPeak.gz
wgEncodeSydhTfbsHelas3Gtf2f1ab28179IggrabAlnRep0	HeLa-S3	GTF2F1	11730	spp.idrOptimal.bf.wgEncodeSydhTfbsHelas3Gtf2f1ab28179IggrabAlnRep0.bam_VS_wgEncodeSydhTfbsHelas3InputIggrabAlnRep1.bam.narrowPeak.gz
wgEncodeSydhTfbsK562Gtf2f1ab28179IggrabAlnRep0	K562	GTF2F1	3621	spp.idrOptimal.bf.wgEncodeSydhTfbsK562Gtf2f1ab28179IggrabAlnRep0.bam_VS_wgEncodeSydhTfbsK562InputIggrabAln.bam.narrowPeak.gz
wgEncodeBroadHistoneK562Hdac1sc6298StdAlnRep0	K562	HDAC1	11833	spp.idrOptimal.bf.wgEncodeBroadHistoneK562Hdac1sc6298StdAlnRep0.bam_VS_wgEncodeBroadHistoneK562ControlStdAlnRep1.bam.narrowPeak.gz
wgEncodeHaibTfbsH1hescHdac2sc6296V0416102AlnRep0	H1-hESC	HDAC2	5644	spp.idrOptimal.bf.wgEncodeHaibTfbsH1hescHdac2sc6296V0416102AlnRep0.bam_VS_wgEncodeHaibTfbsH1hescRxlchPcr1xAlnRep0.bam.narrowPeak.gz
wgEncodeHaibTfbsHepg2Hdac2sc6296V0416101AlnRep0	HepG2	HDAC2	18836	spp.idrOptimal.bf.wgEncodeHaibTfbsHepg2Hdac2sc6296V0416101AlnRep0.bam_VS_wgEncodeHaibTfbsHepg2RxlchPcr1xAlnRep0.bam.narrowPeak.gz
wgEncodeBroadHistoneK562Hdac2a300705aStdAlnRep0	K562	HDAC2	5247	spp.idrOptimal.bf.wgEncodeBroadHistoneK562Hdac2a300705aStdAlnRep0.bam_VS_wgEncodeBroadHistoneK562ControlStdAlnRep1.bam.narrowPeak.gz
wgEncodeHaibTfbsK562Hdac2sc6296V0416102AlnRep0	K562	HDAC2	6672	spp.idrOptimal.bf.wgEncodeHaibTfbsK562Hdac2sc6296V0416102AlnRep0.bam_VS_wgEncodeHaibTfbsK562RxlchPcr1xAlnRep0.bam.narrowPeak.gz
wgEncodeBroadHistoneK562Hdac6a301341aAlnRep0	K562	HDAC6	1114	spp.idrOptimal.bf.wgEncodeBroadHistoneK562Hdac6a301341aAlnRep0.bam_VS_wgEncodeBroadHistoneK562ControlStdAlnRep1.bam.narrowPeak.gz
wgEncodeUchicagoTfbsK562Ehdac8ControlAlnRep0	K562	HDAC8	1718	spp.idrOptimal.bf.wgEncodeUchicagoTfbsK562Ehdac8ControlAlnRep0.bam_VS_wgEncodeUchicagoTfbsK562InputControlhdac8AlnRep0.bam.narrowPeak.gz
wgEncodeSydhTfbsK562Hmgn3StdAlnRep0	K562	HMGN3	14587	spp.idrOptimal.bf.wgEncodeSydhTfbsK562Hmgn3StdAlnRep0.bam_VS_wgEncodeSydhTfbsK562InputStdAlnRep0.bam.narrowPeak.gz
wgEncodeSydhTfbsHepg2Hnf4aForsklnStdAlnRep0	HepG2	HNF4A	11130	spp.idrOptimal.bf.wgEncodeSydhTfbsHepg2Hnf4aForsklnStdAlnRep0.bam_VS_wgEncodeSydhTfbsHepg2InputForsklnStdAlnRep0.bam.narrowPeak.gz
wgEncodeHaibTfbsHepg2Hnf4asc8987V0416101AlnRep0	HepG2	HNF4A	20805	spp.idrOptimal.bf.wgEncodeHaibTfbsHepg2Hnf4asc8987V0416101AlnRep0.bam_VS_wgEncodeHaibTfbsHepg2RxlchPcr1xAlnRep0.bam.narrowPeak.gz
wgEncodeHaibTfbsHepg2Hnf4gsc6558V0416101AlnRep0	HepG2	HNF4G	20384	spp.idrOptimal.bf.wgEncodeHaibTfbsHepg2Hnf4gsc6558V0416101AlnRep0.bam_VS_wgEncodeHaibTfbsHepg2RxlchPcr1xAlnRep0.bam.narrowPeak.gz
wgEncodeSydhTfbsHepg2Hsf1ForsklnStdAlnRep0	HepG2	HSF1	1435	spp.idrOptimal.bf.wgEncodeSydhTfbsHepg2Hsf1ForsklnStdAlnRep0.bam_VS_wgEncodeSydhTfbsHepg2InputForsklnStdAlnRep0.bam.narrowPeak.gz
wgEncodeSydhTfbsGm12878Ikzf1iknuclaStdAlnRep0	GM12878	IKZF1	9047	spp.idrOptimal.bf.wgEncodeSydhTfbsGm12878Ikzf1iknuclaStdAlnRep0.bam_VS_wgEncodeSydhTfbsGm12878InputStdAlnRep1.bam.narrowPeak.gz
wgEncodeUchicagoTfbsK562Ilf2Controlilf2AlnRep0	K562	ILF2	2	spp.idrOptimal.bf.wgEncodeUchicagoTfbsK562Ilf2Controlilf2AlnRep0.bam_VS_wgEncodeUchicagoTfbsK562InputControlilf2AlnRep1.bam.narrowPeak.gz
wgEncodeSydhTfbsK562Irf1Ifna30StdAlnRep0	K562	IRF1	1299	spp.idrOptimal.bf.wgEncodeSydhTfbsK562Irf1Ifna30StdAlnRep0.bam_VS_wgEncodeSydhTfbsK562InputIfna30StdAlnRep1.bam.narrowPeak.gz
wgEncodeSydhTfbsK562Irf1Ifna6hStdAlnRep0	K562	IRF1	8352	spp.idrOptimal.bf.wgEncodeSydhTfbsK562Irf1Ifna6hStdAlnRep0.bam_VS_wgEncodeSydhTfbsK562InputIfna6hStdAlnRep1.bam.narrowPeak.gz
wgEncodeSydhTfbsK562Irf1Ifng30StdAlnRep0	K562	IRF1	10323	spp.idrOptimal.bf.wgEncodeSydhTfbsK562Irf1Ifng30StdAlnRep0.bam_VS_wgEncodeSydhTfbsK562InputIfng30StdAlnRep1.bam.narrowPeak.gz
wgEncodeSydhTfbsK562Irf1Ifng6hStdAlnRep0	K562	IRF1	12576	spp.idrOptimal.bf.wgEncodeSydhTfbsK562Irf1Ifng6hStdAlnRep0.bam_VS_wgEncodeSydhTfbsK562InputIfng6hStdAlnRep1.bam.narrowPeak.gz
wgEncodeSydhTfbsGm12878Irf3IggmusAlnRep0	GM12878	IRF3	327	spp.idrOptimal.bf.wgEncodeSydhTfbsGm12878Irf3IggmusAlnRep0.bam_VS_wgEncodeSydhTfbsGm12878InputIggmusAlnRep0.bam.narrowPeak.gz
wgEncodeSydhTfbsHelas3Irf3IggrabAlnRep0	HeLa-S3	IRF3	1587	spp.idrOptimal.bf.wgEncodeSydhTfbsHelas3Irf3IggrabAlnRep0.bam_VS_wgEncodeSydhTfbsHelas3InputIggrabAlnRep1.bam.narrowPeak.gz
wgEncodeSydhTfbsHepg2Irf3IggrabAlnRep0	HepG2	IRF3	684	spp.idrOptimal.bf.wgEncodeSydhTfbsHepg2Irf3IggrabAlnRep0.bam_VS_wgEncodeSydhTfbsHepg2InputIggrabAln.bam.narrowPeak.gz
wgEncodeHaibTfbsGm12878Irf4sc6059Pcr1xAlnRep0	GM12878	IRF4	17771	spp.idrOptimal.bf.wgEncodeHaibTfbsGm12878Irf4sc6059Pcr1xAlnRep0.bam_VS_wgEncodeHaibTfbsGm12878RxlchPcr1xAlnRep0.bam.narrowPeak.gz
wgEncodeSydhTfbsH1hescCjunIggrabAlnRep0	H1-hESC	JUN	2148	spp.idrOptimal.bf.wgEncodeSydhTfbsH1hescCjunIggrabAlnRep0.bam_VS_wgEncodeSydhTfbsH1hescInputIggrabAln.bam.narrowPeak.gz
wgEncodeSydhTfbsHelas3CjunIggrabAlnRep0	HeLa-S3	JUN	21903	spp.idrOptimal.bf.wgEncodeSydhTfbsHelas3CjunIggrabAlnRep0.bam_VS_wgEncodeSydhTfbsHelas3InputIggrabAlnRep1.bam.narrowPeak.gz
wgEncodeSydhTfbsHepg2CjunIggrabAlnRep0	HepG2	JUN	12672	spp.idrOptimal.bf.wgEncodeSydhTfbsHepg2CjunIggrabAlnRep0.bam_VS_wgEncodeSydhTfbsHepg2InputIggrabAln.bam.narrowPeak.gz
wgEncodeSydhTfbsHuvecCjunStdAlnRep0	HUVEC	JUN	29524	spp.idrOptimal.bf.wgEncodeSydhTfbsHuvecCjunStdAlnRep0.bam_VS_wgEncodeSydhTfbsHuvecInputStdAlnRep0.bam.narrowPeak.gz
wgEncodeSydhTfbsK562CjunIfna30StdAlnRep0	K562	JUN	8827	spp.idrOptimal.bf.wgEncodeSydhTfbsK562CjunIfna30StdAlnRep0.bam_VS_wgEncodeSydhTfbsK562InputIfna30StdAlnRep1.bam.narrowPeak.gz
wgEncodeSydhTfbsK562CjunIfna6hStdAlnRep0	K562	JUN	5218	spp.idrOptimal.bf.wgEncodeSydhTfbsK562CjunIfna6hStdAlnRep0.bam_VS_wgEncodeSydhTfbsK562InputIfna6hStdAlnRep1.bam.narrowPeak.gz
wgEncodeSydhTfbsK562CjunIfng30StdAlnRep0	K562	JUN	8587	spp.idrOptimal.bf.wgEncodeSydhTfbsK562CjunIfng30StdAlnRep0.bam_VS_wgEncodeSydhTfbsK562InputIfng30StdAlnRep1.bam.narrowPeak.gz
wgEncodeSydhTfbsK562CjunIfng6hStdAlnRep0	K562	JUN	6596	spp.idrOptimal.bf.wgEncodeSydhTfbsK562CjunIfng6hStdAlnRep0.bam_VS_wgEncodeSydhTfbsK562InputIfng6hStdAlnRep1.bam.narrowPeak.gz
wgEncodeSydhTfbsK562CjunStdAlnRep0	K562	JUN	9848	spp.idrOptimal.bf.wgEncodeSydhTfbsK562CjunStdAlnRep0.bam_VS_wgEncodeSydhTfbsK562InputStdAlnRep0.bam.narrowPeak.gz
wgEncodeUchicagoTfbsK562EjunbControlAlnRep0	K562	JUNB	12287	spp.idrOptimal.bf.wgEncodeUchicagoTfbsK562EjunbControlAlnRep0.bam_VS_wgEncodeUchicagoTfbsK562InputControljunbAlnRep0.bam.narrowPeak.gz
wgEncodeSydhTfbsGm12878JundStdAlnRep0	GM12878	JUND	2472	spp.idrOptimal.bf.wgEncodeSydhTfbsGm12878JundStdAlnRep0.bam_VS_wgEncodeSydhTfbsGm12878InputStdAlnRep1.bam.narrowPeak.gz
wgEncodeHaibTfbsH1hescJundV0416102AlnRep0	H1-hESC	JUND	8447	spp.idrOptimal.bf.wgEncodeHaibTfbsH1hescJundV0416102AlnRep0.bam_VS_wgEncodeHaibTfbsH1hescRxlchPcr1xAlnRep0.bam.narrowPeak.gz
wgEncodeSydhTfbsH1hescJundIggrabAlnRep0	H1-hESC	JUND	9550	spp.idrOptimal.bf.wgEncodeSydhTfbsH1hescJundIggrabAlnRep0.bam_VS_wgEncodeSydhTfbsH1hescInputIggrabAln.bam.narrowPeak.gz
wgEncodeSydhTfbsHelas3JundIggrabAlnRep0	HeLa-S3	JUND	31633	spp.idrOptimal.bf.wgEncodeSydhTfbsHelas3JundIggrabAlnRep0.bam_VS_wgEncodeSydhTfbsHelas3InputIggrabAlnRep1.bam.narrowPeak.gz
wgEncodeHaibTfbsHepg2JundPcr1xAlnRep0	HepG2	JUND	21614	spp.idrOptimal.bf.wgEncodeHaibTfbsHepg2JundPcr1xAlnRep0.bam_VS_wgEncodeHaibTfbsHepg2RxlchPcr1xAlnRep0.bam.narrowPeak.gz
wgEncodeSydhTfbsHepg2JundIggrabAlnRep0	HepG2	JUND	32275	spp.idrOptimal.bf.wgEncodeSydhTfbsHepg2JundIggrabAlnRep0.bam_VS_wgEncodeSydhTfbsHepg2InputIggrabAln.bam.narrowPeak.gz
wgEncodeUchicagoTfbsK562EjundControlAlnRep0	K562	JUND	26674	spp.idrOptimal.bf.wgEncodeUchicagoTfbsK562EjundControlAlnRep0.bam_VS_wgEncodeUchicagoTfbsK562InputControljundAlnRep0.bam.narrowPeak.gz
wgEncodeSydhTfbsK562JundIggrabAlnRep0	K562	JUND	40052	spp.idrOptimal.bf.wgEncodeSydhTfbsK562JundIggrabAlnRep0.bam_VS_wgEncodeSydhTfbsK562InputIggrabAln.bam.narrowPeak.gz
wgEncodeSydhTfbsGm12878Gcn5StdAlnRep0	GM12878	KAT2A	164	spp.idrOptimal.bf.wgEncodeSydhTfbsGm12878Gcn5StdAlnRep0.bam_VS_wgEncodeSydhTfbsGm12878InputStdAlnRep1.bam.narrowPeak.gz
wgEncodeSydhTfbsHelas3Gcn5StdAlnRep0	HeLa-S3	KAT2A	256	spp.idrOptimal.bf.wgEncodeSydhTfbsHelas3Gcn5StdAlnRep0.bam_VS_wgEncodeSydhTfbsHelas3InputStdAlnRep1.bam.narrowPeak.gz
wgEncodeBroadHistoneH1hescJarid1aab26049StdAlnRep0	H1-hESC	KDM5A	1625	spp.idrOptimal.bf.wgEncodeBroadHistoneH1hescJarid1aab26049StdAlnRep0.bam_VS_wgEncodeBroadHistoneH1hescControlStdAlnRep0.bam.narrowPeak.gz
wgEncodeBroadHistoneK562Plu1StdAlnRep0	K562	KDM5B	15520	spp.idrOptimal.bf.wgEncodeBroadHistoneK562Plu1StdAlnRep0.bam_VS_wgEncodeBroadHistoneK562ControlStdAlnRep1.bam.narrowPeak.gz
wgEncodeSydhTfbsHepg2Maffm8194IggrabAlnRep0	HepG2	MAFF	37637	spp.idrOptimal.bf.wgEncodeSydhTfbsHepg2Maffm8194IggrabAlnRep0.bam_VS_wgEncodeSydhTfbsHepg2InputIggrabAln.bam.narrowPeak.gz
wgEncodeSydhTfbsK562MaffIggrabAlnRep0	K562	MAFF	25074	spp.idrOptimal.bf.wgEncodeSydhTfbsK562MaffIggrabAlnRep0.bam_VS_wgEncodeSydhTfbsK562InputIggrabAln.bam.narrowPeak.gz
wgEncodeSydhTfbsH1hescMafkIggrabAlnRep0	H1-hESC	MAFK	11425	spp.idrOptimal.bf.wgEncodeSydhTfbsH1hescMafkIggrabAlnRep0.bam_VS_wgEncodeSydhTfbsH1hescInputIggrabAln.bam.narrowPeak.gz
wgEncodeSydhTfbsHelas3MafkIggrabAlnRep0	HeLa-S3	MAFK	14185	spp.idrOptimal.bf.wgEncodeSydhTfbsHelas3MafkIggrabAlnRep0.bam_VS_wgEncodeSydhTfbsHelas3InputIggrabAlnRep1.bam.narrowPeak.gz
wgEncodeSydhTfbsHepg2Mafkab50322IggrabAlnRep0	HepG2	MAFK	61944	spp.idrOptimal.bf.wgEncodeSydhTfbsHepg2Mafkab50322IggrabAlnRep0.bam_VS_wgEncodeSydhTfbsHepg2InputIggrabAln.bam.narrowPeak.gz
wgEncodeSydhTfbsHepg2Mafksc477IggrabAlnRep0	HepG2	MAFK	37628	spp.idrOptimal.bf.wgEncodeSydhTfbsHepg2Mafksc477IggrabAlnRep0.bam_VS_wgEncodeSydhTfbsHepg2InputIggrabAln.bam.narrowPeak.gz
wgEncodeSydhTfbsImr90MafkIggrabAlnRep0	IMR90	MAFK	40788	spp.idrOptimal.bf.wgEncodeSydhTfbsImr90MafkIggrabAlnRep0.bam_VS_wgEncodeSydhTfbsImr90InputIggrabAlnRep1.bam.narrowPeak.gz
wgEncodeSydhTfbsK562Mafkab50322IggrabAlnRep0	K562	MAFK	19317	spp.idrOptimal.bf.wgEncodeSydhTfbsK562Mafkab50322IggrabAlnRep0.bam_VS_wgEncodeSydhTfbsK562InputIggrabAln.bam.narrowPeak.gz
wgEncodeSydhTfbsA549MaxIggrabAlnRep0	A549	MAX	9881	spp.idrOptimal.bf.wgEncodeSydhTfbsA549MaxIggrabAlnRep0.bam_VS_wgEncodeSydhTfbsA549InputIggrabAlnRep1.bam.narrowPeak.gz
wgEncodeSydhTfbsGm12878MaxIggmusAlnRep0	GM12878	MAX	12542	spp.idrOptimal.bf.wgEncodeSydhTfbsGm12878MaxIggmusAlnRep0.bam_VS_wgEncodeSydhTfbsGm12878InputIggmusAlnRep0.bam.narrowPeak.gz
wgEncodeSydhTfbsH1hescMaxUcdAlnRep0	H1-hESC	MAX	11129	spp.idrOptimal.bf.wgEncodeSydhTfbsH1hescMaxUcdAlnRep0.bam_VS_wgEncodeSydhTfbsH1hescInputUcdAln.bam.narrowPeak.gz
wgEncodeSydhTfbsHelas3MaxIggrabAlnRep0	HeLa-S3	MAX	29647	spp.idrOptimal.bf.wgEncodeSydhTfbsHelas3MaxIggrabAlnRep0.bam_VS_wgEncodeSydhTfbsHelas3InputIggrabAlnRep1.bam.narrowPeak.gz
wgEncodeSydhTfbsHepg2MaxIggrabAlnRep0	HepG2	MAX	11854	spp.idrOptimal.bf.wgEncodeSydhTfbsHepg2MaxIggrabAlnRep0.bam_VS_wgEncodeSydhTfbsHepg2InputIggrabAln.bam.narrowPeak.gz
wgEncodeSydhTfbsHuvecMaxStdAlnRep0	HUVEC	MAX	9122	spp.idrOptimal.bf.wgEncodeSydhTfbsHuvecMaxStdAlnRep0.bam_VS_wgEncodeSydhTfbsHuvecInputStdAlnRep0.bam.narrowPeak.gz
wgEncodeHaibTfbsK562MaxV0416102AlnRep0	K562	MAX	46171	spp.idrOptimal.bf.wgEncodeHaibTfbsK562MaxV0416102AlnRep0.bam_VS_wgEncodeHaibTfbsK562RxlchPcr1xAlnRep0.bam.narrowPeak.gz
wgEncodeSydhTfbsK562MaxIggrabAlnRep0	K562	MAX	31436	spp.idrOptimal.bf.wgEncodeSydhTfbsK562MaxIggrabAlnRep0.bam_VS_wgEncodeSydhTfbsK562InputIggrabAln.bam.narrowPeak.gz
wgEncodeSydhTfbsNb4MaxStdAlnRep0	NB4	MAX	34659	spp.idrOptimal.bf.wgEncodeSydhTfbsNb4MaxStdAlnRep0.bam_VS_wgEncodeSydhTfbsNb4InputStdAlnRep1.bam.narrowPeak.gz
wgEncodeSydhTfbsGm12878Mazab85725IggmusAlnRep0	GM12878	MAZ	18952	spp.idrOptimal.bf.wgEncodeSydhTfbsGm12878Mazab85725IggmusAlnRep0.bam_VS_wgEncodeSydhTfbsGm12878InputIggmusAlnRep0.bam.narrowPeak.gz
wgEncodeSydhTfbsHelas3Mazab85725IggrabAlnRep0	HeLa-S3	MAZ	13409	spp.idrOptimal.bf.wgEncodeSydhTfbsHelas3Mazab85725IggrabAlnRep0.bam_VS_wgEncodeSydhTfbsHelas3InputIggrabAlnRep1.bam.narrowPeak.gz
wgEncodeSydhTfbsHepg2Mazab85725IggrabAlnRep0	HepG2	MAZ	12090	spp.idrOptimal.bf.wgEncodeSydhTfbsHepg2Mazab85725IggrabAlnRep0.bam_VS_wgEncodeSydhTfbsHepg2InputIggrabAln.bam.narrowPeak.gz
wgEncodeSydhTfbsK562Mazab85725IggrabAlnRep0	K562	MAZ	33323	spp.idrOptimal.bf.wgEncodeSydhTfbsK562Mazab85725IggrabAlnRep0.bam_VS_wgEncodeSydhTfbsK562InputIggrabAln.bam.narrowPeak.gz
wgEncodeHaibTfbsHepg2Mbd4sc271530V0422111AlnRep0	HepG2	MBD4	5912	spp.idrOptimal.bf.wgEncodeHaibTfbsHepg2Mbd4sc271530V0422111AlnRep0.bam_VS_wgEncodeHaibTfbsHepg2RxlchPcr1xAlnRep0.bam.narrowPeak.gz
wgEncodeHaibTfbsGm12878Mef2aPcr1xAlnRep0	GM12878	MEF2A	17605	spp.idrOptimal.bf.wgEncodeHaibTfbsGm12878Mef2aPcr1xAlnRep0.bam_VS_wgEncodeHaibTfbsGm12878RxlchPcr1xAlnRep0.bam.narrowPeak.gz
wgEncodeHaibTfbsK562Mef2aV0416101AlnRep0	K562	MEF2A	5631	spp.idrOptimal.bf.wgEncodeHaibTfbsK562Mef2aV0416101AlnRep0.bam_VS_wgEncodeHaibTfbsK562RxlchPcr1xAlnRep0.bam.narrowPeak.gz
wgEncodeHaibTfbsGm12878Mef2csc13268V0416101AlnRep0	GM12878	MEF2C	9216	spp.idrOptimal.bf.wgEncodeHaibTfbsGm12878Mef2csc13268V0416101AlnRep0.bam_VS_wgEncodeHaibTfbsGm12878RxlchPcr1xAlnRep0.bam.narrowPeak.gz
wgEncodeUchicagoTfbsK562Mll5Controlmll5AlnRep0	K562	MLL5	15	spp.idrOptimal.bf.wgEncodeUchicagoTfbsK562Mll5Controlmll5AlnRep0.bam_VS_wgEncodeUchicagoTfbsK562InputControlmll5AlnRep1.bam.narrowPeak.gz
wgEncodeHaibTfbsGm12878Mta3sc81325V0422111AlnRep0	GM12878	MTA3	12032	spp.idrOptimal.bf.wgEncodeHaibTfbsGm12878Mta3sc81325V0422111AlnRep0.bam_VS_wgEncodeHaibTfbsGm12878ControlV0422111AlnRep0.bam.narrowPeak.gz
wgEncodeSydhTfbsGm12878Mxi1IggmusAlnRep0	GM12878	MXI1	17735	spp.idrOptimal.bf.wgEncodeSydhTfbsGm12878Mxi1IggmusAlnRep0.bam_VS_wgEncodeSydhTfbsGm12878InputIggmusAlnRep0.bam.narrowPeak.gz
wgEncodeSydhTfbsH1hescMxi1IggrabAlnRep0	H1-hESC	MXI1	6351	spp.idrOptimal.bf.wgEncodeSydhTfbsH1hescMxi1IggrabAlnRep0.bam_VS_wgEncodeSydhTfbsH1hescInputIggrabAln.bam.narrowPeak.gz
wgEncodeSydhTfbsHelas3Mxi1af4185IggrabAlnRep0	HeLa-S3	MXI1	12009	spp.idrOptimal.bf.wgEncodeSydhTfbsHelas3Mxi1af4185IggrabAlnRep0.bam_VS_wgEncodeSydhTfbsHelas3InputIggrabAlnRep1.bam.narrowPeak.gz
wgEncodeSydhTfbsHepg2Mxi1StdAlnRep0	HepG2	MXI1	20371	spp.idrOptimal.bf.wgEncodeSydhTfbsHepg2Mxi1StdAlnRep0.bam_VS_wgEncodeSydhTfbsHepg2InputIggrabAln.bam.narrowPeak.gz
wgEncodeSydhTfbsK562Mxi1af4185IggrabAlnRep0	K562	MXI1	6711	spp.idrOptimal.bf.wgEncodeSydhTfbsK562Mxi1af4185IggrabAlnRep0.bam_VS_wgEncodeSydhTfbsK562InputIggrabAln.bam.narrowPeak.gz
wgEncodeHaibTfbsHepg2Mybl2sc81192V0422111AlnRep0	HepG2	MYBL2	17898	spp.idrOptimal.bf.wgEncodeHaibTfbsHepg2Mybl2sc81192V0422111AlnRep0.bam_VS_wgEncodeHaibTfbsHepg2RxlchPcr1xAlnRep0.bam.narrowPeak.gz
wgEncodeOpenChromChipGm12878CmycAlnRep0	GM12878	MYC	3690	spp.idrOptimal.bf.wgEncodeOpenChromChipGm12878CmycAlnRep0.bam_VS_wgEncodeOpenChromChipGm12878InputAln.bam.narrowPeak.gz
wgEncodeSydhTfbsH1hescCmycIggrabAlnRep0	H1-hESC	MYC	4551	spp.idrOptimal.bf.wgEncodeSydhTfbsH1hescCmycIggrabAlnRep0.bam_VS_wgEncodeSydhTfbsH1hescInputIggrabAln.bam.narrowPeak.gz
wgEncodeOpenChromChipH1hescCmycAlnRep1	H1-hESC	MYC	1217	spp.idrOptimal.bf.wgEncodeOpenChromChipH1hescCmycAlnRep1.bam_VS_wgEncodeOpenChromChipHepg2InputAln.bam.narrowPeak.gz
wgEncodeOpenChromChipHelas3CmycAlnRep0	HeLa-S3	MYC	2835	spp.idrOptimal.bf.wgEncodeOpenChromChipHelas3CmycAlnRep0.bam_VS_wgEncodeOpenChromChipHelas3InputAln.bam.narrowPeak.gz
wgEncodeSydhTfbsHelas3CmycStdAlnRep0	HeLa-S3	MYC	10226	spp.idrOptimal.bf.wgEncodeSydhTfbsHelas3CmycStdAlnRep0.bam_VS_wgEncodeSydhTfbsHelas3InputStdAlnRep1.bam.narrowPeak.gz
wgEncodeOpenChromChipHepg2CmycAlnRep0	HepG2	MYC	4413	spp.idrOptimal.bf.wgEncodeOpenChromChipHepg2CmycAlnRep0.bam_VS_wgEncodeOpenChromChipHepg2InputAln.bam.narrowPeak.gz
wgEncodeOpenChromChipHuvecCmycAlnRep1	HUVEC	MYC	5145	spp.idrOptimal.bf.wgEncodeOpenChromChipHuvecCmycAlnRep1.bam_VS_wgEncodeOpenChromChipHuvecInputAln.bam.narrowPeak.gz
wgEncodeSydhTfbsK562CmycIfng30StdAlnRep0	K562	MYC	31092	spp.idrOptimal.bf.wgEncodeSydhTfbsK562CmycIfng30StdAlnRep0.bam_VS_wgEncodeSydhTfbsK562InputIfng30StdAlnRep1.bam.narrowPeak.gz
wgEncodeSydhTfbsK562CmycIggrabAlnRep0	K562	MYC	24153	spp.idrOptimal.bf.wgEncodeSydhTfbsK562CmycIggrabAlnRep0.bam_VS_wgEncodeSydhTfbsK562InputIggrabAln.bam.narrowPeak.gz
wgEncodeOpenChromChipK562CmycAlnRep0	K562	MYC	11738	spp.idrOptimal.bf.wgEncodeOpenChromChipK562CmycAlnRep0.bam_VS_wgEncodeOpenChromChipK562InputAln.bam.narrowPeak.gz
wgEncodeSydhTfbsK562CmycIfna30StdAlnRep0	K562	MYC	7746	spp.idrOptimal.bf.wgEncodeSydhTfbsK562CmycIfna30StdAlnRep0.bam_VS_wgEncodeSydhTfbsK562InputIfna30StdAlnRep1.bam.narrowPeak.gz
wgEncodeSydhTfbsK562CmycIfna6hStdAlnRep0	K562	MYC	10583	spp.idrOptimal.bf.wgEncodeSydhTfbsK562CmycIfna6hStdAlnRep0.bam_VS_wgEncodeSydhTfbsK562InputIfna6hStdAlnRep1.bam.narrowPeak.gz
wgEncodeSydhTfbsK562CmycIfng6hStdAlnRep0	K562	MYC	19290	spp.idrOptimal.bf.wgEncodeSydhTfbsK562CmycIfng6hStdAlnRep0.bam_VS_wgEncodeSydhTfbsK562InputIfng6hStdAlnRep1.bam.narrowPeak.gz
wgEncodeSydhTfbsK562CmycStdAlnRep0	K562	MYC	5023	spp.idrOptimal.bf.wgEncodeSydhTfbsK562CmycStdAlnRep0.bam_VS_wgEncodeSydhTfbsK562InputStdAlnRep0.bam.narrowPeak.gz
wgEncodeOpenChromChipMcf7CmycEstroAlnRep0	MCF-7	MYC	10072	spp.idrOptimal.bf.wgEncodeOpenChromChipMcf7CmycEstroAlnRep0.bam_VS_wgEncodeOpenChromChipMcf7InputAln.bam.narrowPeak.gz
wgEncodeOpenChromChipMcf7CmycSerumstvdAlnRep0	MCF-7	MYC	6930	spp.idrOptimal.bf.wgEncodeOpenChromChipMcf7CmycSerumstvdAlnRep0.bam_VS_wgEncodeOpenChromChipMcf7InputAln.bam.narrowPeak.gz
wgEncodeOpenChromChipMcf7CmycSerumstimAlnRep0	MCF-7	MYC	20956	spp.idrOptimal.bf.wgEncodeOpenChromChipMcf7CmycSerumstimAlnRep0.bam_VS_wgEncodeOpenChromChipMcf7InputAln.bam.narrowPeak.gz
wgEncodeOpenChromChipMcf7CmycVehAlnRep0	MCF-7	MYC	27697	spp.idrOptimal.bf.wgEncodeOpenChromChipMcf7CmycVehAlnRep0.bam_VS_wgEncodeOpenChromChipMcf7InputAln.bam.narrowPeak.gz
wgEncodeSydhTfbsMcf10aesCmycTam14hHvdAlnRep0	MCF10A-Er-Src	MYC	25703	spp.idrOptimal.bf.wgEncodeSydhTfbsMcf10aesCmycTam14hHvdAlnRep0.bam_VS_wgEncodeSydhTfbsMcf10aesInputHvdAlnRep1.bam.narrowPeak.gz
wgEncodeSydhTfbsMcf10aesCmycEtoh01HvdAlnRep0	MCF10A-Er-Src	MYC	35153	spp.idrOptimal.bf.wgEncodeSydhTfbsMcf10aesCmycEtoh01HvdAlnRep0.bam_VS_wgEncodeSydhTfbsMcf10aesInputHvdAlnRep1.bam.narrowPeak.gz
wgEncodeSydhTfbsNb4CmycStdAlnRep0	NB4	MYC	26252	spp.idrOptimal.bf.wgEncodeSydhTfbsNb4CmycStdAlnRep0.bam_VS_wgEncodeSydhTfbsNb4InputStdAlnRep1.bam.narrowPeak.gz
wgEncodeHaibTfbsH1hescNanogsc33759V0416102AlnRep0	H1-hESC	NANOG	5473	spp.idrOptimal.bf.wgEncodeHaibTfbsH1hescNanogsc33759V0416102AlnRep0.bam_VS_wgEncodeHaibTfbsH1hescRxlchPcr1xAlnRep0.bam.narrowPeak.gz
wgEncodeHaibTfbsGm12878Nfatc1sc17834V0422111AlnRep0	GM12878	NFATC1	10812	spp.idrOptimal.bf.wgEncodeHaibTfbsGm12878Nfatc1sc17834V0422111AlnRep0.bam_VS_wgEncodeHaibTfbsGm12878ControlV0422111AlnRep0.bam.narrowPeak.gz
wgEncodeSydhTfbsGm12878Nfe2sc22827StdAlnRep0	GM12878	NFE2	772	spp.idrOptimal.bf.wgEncodeSydhTfbsGm12878Nfe2sc22827StdAlnRep0.bam_VS_wgEncodeSydhTfbsGm12878InputStdAlnRep1.bam.narrowPeak.gz
wgEncodeSydhTfbsK562Nfe2StdAlnRep0	K562	NFE2	2637	spp.idrOptimal.bf.wgEncodeSydhTfbsK562Nfe2StdAlnRep0.bam_VS_wgEncodeSydhTfbsK562InputStdAlnRep0.bam.narrowPeak.gz
wgEncodeHaibTfbsGm12878Nficsc81335V0422111AlnRep0	GM12878	NFIC	29060	spp.idrOptimal.bf.wgEncodeHaibTfbsGm12878Nficsc81335V0422111AlnRep0.bam_VS_wgEncodeHaibTfbsGm12878ControlV0422111AlnRep0.bam.narrowPeak.gz
wgEncodeHaibTfbsHepg2Nficsc81335V0422111AlnRep0	HepG2	NFIC	16091	spp.idrOptimal.bf.wgEncodeHaibTfbsHepg2Nficsc81335V0422111AlnRep0.bam_VS_wgEncodeHaibTfbsHepg2RxlchPcr1xAlnRep0.bam.narrowPeak.gz
wgEncodeSydhTfbsGm10847NfkbTnfaIggrabAlnRep0	GM10847	NFKB1	9262	spp.idrOptimal.bf.wgEncodeSydhTfbsGm10847NfkbTnfaIggrabAlnRep0.bam_VS_wgEncodeSydhTfbsGm10847InputTnfaIggrabAlnRep0.bam.narrowPeak.gz
wgEncodeSydhTfbsGm12878NfkbTnfaIggrabAlnRep0	GM12878	NFKB1	17036	spp.idrOptimal.bf.wgEncodeSydhTfbsGm12878NfkbTnfaIggrabAlnRep0.bam_VS_wgEncodeSydhTfbsGm12878InputTnfaIggrabAlnRep0.bam.narrowPeak.gz
wgEncodeSydhTfbsGm12891NfkbTnfaIggrabAlnRep0	GM12891	NFKB1	28683	spp.idrOptimal.bf.wgEncodeSydhTfbsGm12891NfkbTnfaIggrabAlnRep0.bam_VS_wgEncodeSydhTfbsGm12891InputTnfaIggrabAlnRep0.bam.narrowPeak.gz
wgEncodeSydhTfbsGm12892NfkbTnfaIggrabAlnRep0	GM12892	NFKB1	8152	spp.idrOptimal.bf.wgEncodeSydhTfbsGm12892NfkbTnfaIggrabAlnRep0.bam_VS_wgEncodeSydhTfbsGm12892InputTnfaIggrabAlnRep0.bam.narrowPeak.gz
wgEncodeSydhTfbsGm15510NfkbTnfaIggrabAlnRep0	GM15510	NFKB1	12803	spp.idrOptimal.bf.wgEncodeSydhTfbsGm15510NfkbTnfaIggrabAlnRep0.bam_VS_wgEncodeSydhTfbsGm15510InputTnfaIggrabAlnRep0.bam.narrowPeak.gz
wgEncodeSydhTfbsGm18505NfkbTnfaIggrabAlnRep0	GM18505	NFKB1	8805	spp.idrOptimal.bf.wgEncodeSydhTfbsGm18505NfkbTnfaIggrabAlnRep0.bam_VS_wgEncodeSydhTfbsGm18505InputTnfaIggrabAlnRep0.bam.narrowPeak.gz
wgEncodeSydhTfbsGm18526NfkbTnfaIggrabAlnRep0	GM18526	NFKB1	3070	spp.idrOptimal.bf.wgEncodeSydhTfbsGm18526NfkbTnfaIggrabAlnRep0.bam_VS_wgEncodeSydhTfbsGm18526InputTnfaIggrabAlnRep0.bam.narrowPeak.gz
wgEncodeSydhTfbsGm18951NfkbTnfaIggrabAlnRep0	GM18951	NFKB1	13535	spp.idrOptimal.bf.wgEncodeSydhTfbsGm18951NfkbTnfaIggrabAlnRep0.bam_VS_wgEncodeSydhTfbsGm18951InputTnfaIggrabAlnRep0.bam.narrowPeak.gz
wgEncodeSydhTfbsGm19099NfkbTnfaIggrabAlnRep0	GM19099	NFKB1	7777	spp.idrOptimal.bf.wgEncodeSydhTfbsGm19099NfkbTnfaIggrabAlnRep0.bam_VS_wgEncodeSydhTfbsGm19099InputTnfaIggrabAlnRep0.bam.narrowPeak.gz
wgEncodeSydhTfbsGm19193NfkbTnfaIggrabAlnRep0	GM19193	NFKB1	5280	spp.idrOptimal.bf.wgEncodeSydhTfbsGm19193NfkbTnfaIggrabAlnRep0.bam_VS_wgEncodeSydhTfbsGm19193InputTnfaIggrabAlnRep0.bam.narrowPeak.gz
wgEncodeSydhTfbsGm12878NfyaIggmusAlnRep0	GM12878	NFYA	1841	spp.idrOptimal.bf.wgEncodeSydhTfbsGm12878NfyaIggmusAlnRep0.bam_VS_wgEncodeSydhTfbsGm12878InputIggmusAlnRep0.bam.narrowPeak.gz
wgEncodeSydhTfbsHelas3NfyaIggrabAlnRep0	HeLa-S3	NFYA	5978	spp.idrOptimal.bf.wgEncodeSydhTfbsHelas3NfyaIggrabAlnRep0.bam_VS_wgEncodeSydhTfbsHelas3InputIggrabAlnRep1.bam.narrowPeak.gz
wgEncodeSydhTfbsK562NfyaStdAlnRep0	K562	NFYA	4286	spp.idrOptimal.bf.wgEncodeSydhTfbsK562NfyaStdAlnRep0.bam_VS_wgEncodeSydhTfbsK562InputStdAlnRep0.bam.narrowPeak.gz
wgEncodeSydhTfbsGm12878NfybIggmusAlnRep0	GM12878	NFYB	13295	spp.idrOptimal.bf.wgEncodeSydhTfbsGm12878NfybIggmusAlnRep0.bam_VS_wgEncodeSydhTfbsGm12878InputIggmusAlnRep0.bam.narrowPeak.gz
wgEncodeSydhTfbsHelas3NfybIggrabAlnRep0	HeLa-S3	NFYB	7156	spp.idrOptimal.bf.wgEncodeSydhTfbsHelas3NfybIggrabAlnRep0.bam_VS_wgEncodeSydhTfbsHelas3InputIggrabAlnRep1.bam.narrowPeak.gz
wgEncodeSydhTfbsK562NfybStdAlnRep0	K562	NFYB	10096	spp.idrOptimal.bf.wgEncodeSydhTfbsK562NfybStdAlnRep0.bam_VS_wgEncodeSydhTfbsK562InputStdAlnRep0.bam.narrowPeak.gz
wgEncodeSydhTfbsGm12878Tr4StdAlnRep0	GM12878	NR2C2	1263	spp.idrOptimal.bf.wgEncodeSydhTfbsGm12878Tr4StdAlnRep0.bam_VS_wgEncodeSydhTfbsGm12878InputStdAlnRep1.bam.narrowPeak.gz
wgEncodeSydhTfbsHelas3Tr4StdAlnRep0	HeLa-S3	NR2C2	2115	spp.idrOptimal.bf.wgEncodeSydhTfbsHelas3Tr4StdAlnRep0.bam_VS_wgEncodeSydhTfbsHelas3InputStdAlnRep1.bam.narrowPeak.gz
wgEncodeSydhTfbsHepg2Tr4UcdAlnRep0	HepG2	NR2C2	2953	spp.idrOptimal.bf.wgEncodeSydhTfbsHepg2Tr4UcdAlnRep0.bam_VS_wgEncodeSydhTfbsHepg2InputUcdAlnRep1.bam.narrowPeak.gz
wgEncodeSydhTfbsK562Tr4UcdAlnRep0	K562	NR2C2	587	spp.idrOptimal.bf.wgEncodeSydhTfbsK562Tr4UcdAlnRep0.bam_VS_wgEncodeSydhTfbsK562InputUcdAlnRep1.bam.narrowPeak.gz
wgEncodeHaibTfbsK562Nr2f2sc271940V0422111AlnRep0	K562	NR2F2	16678	spp.idrOptimal.bf.wgEncodeHaibTfbsK562Nr2f2sc271940V0422111AlnRep0.bam_VS_wgEncodeHaibTfbsK562ControlV0422111AlnRep1.bam.narrowPeak.gz
wgEncodeHaibTfbsA549GrPcr2xDex100nmAlnRep0	A549	NR3C1	16720	spp.idrOptimal.bf.wgEncodeHaibTfbsA549GrPcr2xDex100nmAlnRep0.bam_VS_wgEncodeHaibTfbsA549GrPcr1xEtoh02AlnRep0.bam.narrowPeak.gz
wgEncodeHaibTfbsA549GrPcr1xDex500pmAlnRep0	A549	NR3C1	1009	spp.idrOptimal.bf.wgEncodeHaibTfbsA549GrPcr1xDex500pmAlnRep0.bam_VS_wgEncodeHaibTfbsA549GrPcr1xEtoh02AlnRep0.bam.narrowPeak.gz
wgEncodeHaibTfbsA549GrPcr1xDex50nmAlnRep0	A549	NR3C1	23324	spp.idrOptimal.bf.wgEncodeHaibTfbsA549GrPcr1xDex50nmAlnRep0.bam_VS_wgEncodeHaibTfbsA549GrPcr1xEtoh02AlnRep0.bam.narrowPeak.gz
wgEncodeHaibTfbsA549GrPcr1xDex5nmAlnRep0	A549	NR3C1	10279	spp.idrOptimal.bf.wgEncodeHaibTfbsA549GrPcr1xDex5nmAlnRep0.bam_VS_wgEncodeHaibTfbsA549GrPcr1xEtoh02AlnRep0.bam.narrowPeak.gz
wgEncodeHaibTfbsEcc1GrV0416102Dex100nmAlnRep0	ECC-1	NR3C1	9255	spp.idrOptimal.bf.wgEncodeHaibTfbsEcc1GrV0416102Dex100nmAlnRep0.bam_VS_wgEncodeHaibTfbsEcc1GrV0416102Etoh02AlnRep0.bam.narrowPeak.gz
wgEncodeSydhTfbsHepg2Grp20ForsklnStdAlnRep0	HepG2	NR3C1	597	spp.idrOptimal.bf.wgEncodeSydhTfbsHepg2Grp20ForsklnStdAlnRep0.bam_VS_wgEncodeSydhTfbsHepg2InputForsklnStdAlnRep0.bam.narrowPeak.gz
wgEncodeUchicagoTfbsK562Enr4a1ControlAlnRep0	K562	NR4A1	441	spp.idrOptimal.bf.wgEncodeUchicagoTfbsK562Enr4a1ControlAlnRep0.bam_VS_wgEncodeUchicagoTfbsK562InputControlnr4a1AlnRep0.bam.narrowPeak.gz
wgEncodeSydhTfbsGm12878Nrf1IggmusAlnRep0	GM12878	NRF1	5683	spp.idrOptimal.bf.wgEncodeSydhTfbsGm12878Nrf1IggmusAlnRep0.bam_VS_wgEncodeSydhTfbsGm12878InputIggmusAlnRep0.bam.narrowPeak.gz
wgEncodeSydhTfbsH1hescNrf1IggrabAlnRep0	H1-hESC	NRF1	4513	spp.idrOptimal.bf.wgEncodeSydhTfbsH1hescNrf1IggrabAlnRep0.bam_VS_wgEncodeSydhTfbsH1hescInputIggrabAln.bam.narrowPeak.gz
wgEncodeSydhTfbsHelas3Nrf1IggmusAlnRep0	HeLa-S3	NRF1	2915	spp.idrOptimal.bf.wgEncodeSydhTfbsHelas3Nrf1IggmusAlnRep0.bam_VS_wgEncodeSydhTfbsHelas3InputIggmusAlnRep0.bam.narrowPeak.gz
wgEncodeSydhTfbsHepg2Nrf1IggrabAlnRep0	HepG2	NRF1	1902	spp.idrOptimal.bf.wgEncodeSydhTfbsHepg2Nrf1IggrabAlnRep0.bam_VS_wgEncodeSydhTfbsHepg2InputIggrabAln.bam.narrowPeak.gz
wgEncodeSydhTfbsK562Nrf1IggrabAlnRep0	K562	NRF1	4211	spp.idrOptimal.bf.wgEncodeSydhTfbsK562Nrf1IggrabAlnRep0.bam_VS_wgEncodeSydhTfbsK562InputIggrabAln.bam.narrowPeak.gz
wgEncodeHaibTfbsGm12878Pax5c20Pcr1xAlnRep0	GM12878	PAX5	25342	spp.idrOptimal.bf.wgEncodeHaibTfbsGm12878Pax5c20Pcr1xAlnRep0.bam_VS_wgEncodeHaibTfbsGm12878RxlchPcr1xAlnRep0.bam.narrowPeak.gz
wgEncodeHaibTfbsGm12878Pax5n19Pcr1xAlnRep0	GM12878	PAX5	19740	spp.idrOptimal.bf.wgEncodeHaibTfbsGm12878Pax5n19Pcr1xAlnRep0.bam_VS_wgEncodeHaibTfbsGm12878RxlchPcr1xAlnRep0.bam.narrowPeak.gz
wgEncodeHaibTfbsGm12891Pax5c20V0416101AlnRep0	GM12891	PAX5	3156	spp.idrOptimal.bf.wgEncodeHaibTfbsGm12891Pax5c20V0416101AlnRep0.bam_VS_wgEncodeHaibTfbsGm12891RxlchPcr1xAlnRep0.bam.narrowPeak.gz
wgEncodeHaibTfbsGm12892Pax5c20V0416101AlnRep0	GM12892	PAX5	10300	spp.idrOptimal.bf.wgEncodeHaibTfbsGm12892Pax5c20V0416101AlnRep0.bam_VS_wgEncodeHaibTfbsGm12892RxlchV0416101AlnRep0.bam.narrowPeak.gz
wgEncodeHaibTfbsGm12878Pbx3Pcr1xAlnRep0	GM12878	PBX3	9941	spp.idrOptimal.bf.wgEncodeHaibTfbsGm12878Pbx3Pcr1xAlnRep0.bam_VS_wgEncodeHaibTfbsGm12878RxlchPcr1xAlnRep0.bam.narrowPeak.gz
wgEncodeBroadHistoneK562Phf8a301772aStdAlnRep0	K562	PHF8	22302	spp.idrOptimal.bf.wgEncodeBroadHistoneK562Phf8a301772aStdAlnRep0.bam_VS_wgEncodeBroadHistoneK562ControlStdAlnRep1.bam.narrowPeak.gz
wgEncodeHaibTfbsGm12878Pmlsc71910V0422111AlnRep0	GM12878	PML	16678	spp.idrOptimal.bf.wgEncodeHaibTfbsGm12878Pmlsc71910V0422111AlnRep0.bam_VS_wgEncodeHaibTfbsGm12878ControlV0422111AlnRep0.bam.narrowPeak.gz
wgEncodeHaibTfbsK562Pmlsc71910V0422111AlnRep0	K562	PML	15895	spp.idrOptimal.bf.wgEncodeHaibTfbsK562Pmlsc71910V0422111AlnRep0.bam_VS_wgEncodeHaibTfbsK562ControlV0422111AlnRep1.bam.narrowPeak.gz
wgEncodeSydhTfbsHelas3Rpc155StdAlnRep0	HeLa-S3	POLR3A	2668	spp.idrOptimal.bf.wgEncodeSydhTfbsHelas3Rpc155StdAlnRep0.bam_VS_wgEncodeSydhTfbsHelas3InputStdAlnRep1.bam.narrowPeak.gz
wgEncodeSydhTfbsK562Rpc155StdAlnRep0	K562	POLR3A	1310	spp.idrOptimal.bf.wgEncodeSydhTfbsK562Rpc155StdAlnRep0.bam_VS_wgEncodeSydhTfbsK562InputStdAlnRep0.bam.narrowPeak.gz
wgEncodeHaibTfbsGm12878Pou2f2Pcr1xAlnRep0	GM12878	POU2F2	22891	spp.idrOptimal.bf.wgEncodeHaibTfbsGm12878Pou2f2Pcr1xAlnRep0.bam_VS_wgEncodeHaibTfbsGm12878RxlchPcr1xAlnRep0.bam.narrowPeak.gz
wgEncodeHaibTfbsGm12891Pou2f2Pcr1xAlnRep0	GM12891	POU2F2	14630	spp.idrOptimal.bf.wgEncodeHaibTfbsGm12891Pou2f2Pcr1xAlnRep0.bam_VS_wgEncodeHaibTfbsGm12891RxlchPcr1xAlnRep0.bam.narrowPeak.gz
wgEncodeHaibTfbsH1hescPou5f1sc9081V0416102AlnRep0	H1-hESC	POU5F1	3997	spp.idrOptimal.bf.wgEncodeHaibTfbsH1hescPou5f1sc9081V0416102AlnRep0.bam_VS_wgEncodeHaibTfbsH1hescRxlchPcr1xAlnRep0.bam.narrowPeak.gz
wgEncodeSydhTfbsHepg2Pgc1aForsklnStdAlnRep0	HepG2	PPARGC1A	1308	spp.idrOptimal.bf.wgEncodeSydhTfbsHepg2Pgc1aForsklnStdAlnRep0.bam_VS_wgEncodeSydhTfbsHepg2InputForsklnStdAlnRep0.bam.narrowPeak.gz
wgEncodeSydhTfbsHelas3Prdm19115IggrabAlnRep0	HeLa-S3	PRDM1	4577	spp.idrOptimal.bf.wgEncodeSydhTfbsHelas3Prdm19115IggrabAlnRep0.bam_VS_wgEncodeSydhTfbsHelas3InputIggrabAlnRep1.bam.narrowPeak.gz
wgEncodeSydhTfbsA549Rad21IggrabAlnRep0	A549	RAD21	24465	spp.idrOptimal.bf.wgEncodeSydhTfbsA549Rad21IggrabAlnRep0.bam_VS_wgEncodeSydhTfbsA549InputIggrabAlnRep1.bam.narrowPeak.gz
wgEncodeHaibTfbsGm12878Rad21V0416101AlnRep0	GM12878	RAD21	40019	spp.idrOptimal.bf.wgEncodeHaibTfbsGm12878Rad21V0416101AlnRep0.bam_VS_wgEncodeHaibTfbsGm12878RxlchPcr1xAlnRep0.bam.narrowPeak.gz
wgEncodeSydhTfbsGm12878Rad21IggrabAlnRep0	GM12878	RAD21	33085	spp.idrOptimal.bf.wgEncodeSydhTfbsGm12878Rad21IggrabAlnRep0.bam_VS_wgEncodeSydhTfbsGm12878InputIggrabAlnRep1.bam.narrowPeak.gz
wgEncodeHaibTfbsH1hescRad21V0416102AlnRep0	H1-hESC	RAD21	75680	spp.idrOptimal.bf.wgEncodeHaibTfbsH1hescRad21V0416102AlnRep0.bam_VS_wgEncodeHaibTfbsH1hescRxlchPcr1xAlnRep0.bam.narrowPeak.gz
wgEncodeSydhTfbsH1hescRad21IggrabAlnRep0	H1-hESC	RAD21	55674	spp.idrOptimal.bf.wgEncodeSydhTfbsH1hescRad21IggrabAlnRep0.bam_VS_wgEncodeSydhTfbsH1hescInputIggrabAln.bam.narrowPeak.gz
wgEncodeSydhTfbsHelas3Rad21IggrabAlnRep0	HeLa-S3	RAD21	43420	spp.idrOptimal.bf.wgEncodeSydhTfbsHelas3Rad21IggrabAlnRep0.bam_VS_wgEncodeSydhTfbsHelas3InputIggrabAlnRep1.bam.narrowPeak.gz
wgEncodeHaibTfbsHepg2Rad21V0416101AlnRep0	HepG2	RAD21	54315	spp.idrOptimal.bf.wgEncodeHaibTfbsHepg2Rad21V0416101AlnRep0.bam_VS_wgEncodeHaibTfbsHepg2RxlchPcr1xAlnRep0.bam.narrowPeak.gz
wgEncodeSydhTfbsHepg2Rad21IggrabAlnRep0	HepG2	RAD21	37233	spp.idrOptimal.bf.wgEncodeSydhTfbsHepg2Rad21IggrabAlnRep0.bam_VS_wgEncodeSydhTfbsHepg2InputIggrabAln.bam.narrowPeak.gz
wgEncodeSydhTfbsImr90Rad21IggrabAlnRep0	IMR90	RAD21	37417	spp.idrOptimal.bf.wgEncodeSydhTfbsImr90Rad21IggrabAlnRep0.bam_VS_wgEncodeSydhTfbsImr90InputIggrabAlnRep1.bam.narrowPeak.gz
wgEncodeHaibTfbsK562Rad21V0416102AlnRep0	K562	RAD21	34725	spp.idrOptimal.bf.wgEncodeHaibTfbsK562Rad21V0416102AlnRep0.bam_VS_wgEncodeHaibTfbsK562RxlchPcr1xAlnRep0.bam.narrowPeak.gz
wgEncodeSydhTfbsK562Rad21StdAlnRep0	K562	RAD21	17627	spp.idrOptimal.bf.wgEncodeSydhTfbsK562Rad21StdAlnRep0.bam_VS_wgEncodeSydhTfbsK562InputStdAlnRep0.bam.narrowPeak.gz
wgEncodeHaibTfbsSknshraRad21V0416102AlnRep0	SK-N-SH_RA	RAD21	62275	spp.idrOptimal.bf.wgEncodeHaibTfbsSknshraRad21V0416102AlnRep0.bam_VS_wgEncodeHaibTfbsSknshraRxlchV0416102AlnRep1.bam.narrowPeak.gz
wgEncodeBroadHistoneH1hescRbbp5a300109aStdAlnRep0	H1-hESC	RBBP5	16151	spp.idrOptimal.bf.wgEncodeBroadHistoneH1hescRbbp5a300109aStdAlnRep0.bam_VS_wgEncodeBroadHistoneH1hescControlStdAlnRep0.bam.narrowPeak.gz
wgEncodeBroadHistoneK562Rbbp5a300109aStdAlnRep0	K562	RBBP5	14258	spp.idrOptimal.bf.wgEncodeBroadHistoneK562Rbbp5a300109aStdAlnRep0.bam_VS_wgEncodeBroadHistoneK562ControlStdAlnRep1.bam.narrowPeak.gz
wgEncodeSydhTfbsGm12878Corestsc30189IggmusAlnRep0	GM12878	RCOR1	1397	spp.idrOptimal.bf.wgEncodeSydhTfbsGm12878Corestsc30189IggmusAlnRep0.bam_VS_wgEncodeSydhTfbsGm12878InputIggmusAlnRep0.bam.narrowPeak.gz
wgEncodeSydhTfbsHelas3Corestsc30189IggrabAlnRep0	HeLa-S3	RCOR1	16322	spp.idrOptimal.bf.wgEncodeSydhTfbsHelas3Corestsc30189IggrabAlnRep0.bam_VS_wgEncodeSydhTfbsHelas3InputIggrabAlnRep1.bam.narrowPeak.gz
wgEncodeSydhTfbsHepg2Corestsc30189IggrabAlnRep0	HepG2	RCOR1	5336	spp.idrOptimal.bf.wgEncodeSydhTfbsHepg2Corestsc30189IggrabAlnRep0.bam_VS_wgEncodeSydhTfbsHepg2InputIggrabAln.bam.narrowPeak.gz
wgEncodeSydhTfbsK562Corestab24166IggrabAlnRep0	K562	RCOR1	6371	spp.idrOptimal.bf.wgEncodeSydhTfbsK562Corestab24166IggrabAlnRep0.bam_VS_wgEncodeSydhTfbsK562InputIggrabAln.bam.narrowPeak.gz
wgEncodeSydhTfbsK562Corestsc30189IggrabAlnRep0	K562	RCOR1	35741	spp.idrOptimal.bf.wgEncodeSydhTfbsK562Corestsc30189IggrabAlnRep0.bam_VS_wgEncodeSydhTfbsK562InputIggrabAln.bam.narrowPeak.gz
wgEncodeSydhTfbsK562NelfeStdAlnRep0	K562	RDBP	458	spp.idrOptimal.bf.wgEncodeSydhTfbsK562NelfeStdAlnRep0.bam_VS_wgEncodeSydhTfbsK562InputStdAlnRep0.bam.narrowPeak.gz
wgEncodeHaibTfbsA549NrsfV0422111Etoh02AlnRep0	A549	REST	11970	spp.idrOptimal.bf.wgEncodeHaibTfbsA549NrsfV0422111Etoh02AlnRep0.bam_VS_wgEncodeHaibTfbsA549RxlchPcr1xEtoh02AlnRep0.bam.narrowPeak.gz
wgEncodeHaibTfbsGm12878NrsfPcr1xAlnRep0	GM12878	REST	6906	spp.idrOptimal.bf.wgEncodeHaibTfbsGm12878NrsfPcr1xAlnRep0.bam_VS_wgEncodeHaibTfbsGm12878RxlchPcr1xAlnRep0.bam.narrowPeak.gz
wgEncodeHaibTfbsH1hescNrsfV0416102AlnRep0	H1-hESC	REST	13286	spp.idrOptimal.bf.wgEncodeHaibTfbsH1hescNrsfV0416102AlnRep0.bam_VS_wgEncodeHaibTfbsH1hescRxlchPcr1xAlnRep0.bam.narrowPeak.gz
wgEncodeHaibTfbsHelas3NrsfPcr1xAlnRep0	HeLa-S3	REST	10247	spp.idrOptimal.bf.wgEncodeHaibTfbsHelas3NrsfPcr1xAlnRep0.bam_VS_wgEncodeHaibTfbsHelas3RxlchPcr1xAlnRep1.bam.narrowPeak.gz
wgEncodeHaibTfbsHepg2NrsfPcr2xAlnRep0	HepG2	REST	6024	spp.idrOptimal.bf.wgEncodeHaibTfbsHepg2NrsfPcr2xAlnRep0.bam_VS_wgEncodeHaibTfbsHepg2RxlchPcr1xAlnRep0.bam.narrowPeak.gz
wgEncodeHaibTfbsHepg2NrsfV0416101AlnRep0	HepG2	REST	12828	spp.idrOptimal.bf.wgEncodeHaibTfbsHepg2NrsfV0416101AlnRep0.bam_VS_wgEncodeHaibTfbsHepg2RxlchPcr1xAlnRep0.bam.narrowPeak.gz
wgEncodeHaibTfbsK562NrsfV0416102AlnRep0	K562	REST	15849	spp.idrOptimal.bf.wgEncodeHaibTfbsK562NrsfV0416102AlnRep0.bam_VS_wgEncodeHaibTfbsK562RxlchPcr1xAlnRep0.bam.narrowPeak.gz
wgEncodeHaibTfbsPanc1NrsfPcr2xAlnRep0	PANC-1	REST	5507	spp.idrOptimal.bf.wgEncodeHaibTfbsPanc1NrsfPcr2xAlnRep0.bam_VS_wgEncodeHaibTfbsPanc1RxlchPcr2xAlnRep0.bam.narrowPeak.gz
wgEncodeHaibTfbsPfsk1NrsfPcr2xAlnRep0	PFSK-1	REST	11390	spp.idrOptimal.bf.wgEncodeHaibTfbsPfsk1NrsfPcr2xAlnRep0.bam_VS_wgEncodeHaibTfbsPfsk1RxlchPcr2xAlnRep0.bam.narrowPeak.gz
wgEncodeHaibTfbsSknshNrsfPcr2xAlnRep0	SK-N-SH	REST	18845	spp.idrOptimal.bf.wgEncodeHaibTfbsSknshNrsfPcr2xAlnRep0.bam_VS_wgEncodeHaibTfbsSknshRxlchPcr2xAlnRep0.bam.narrowPeak.gz
wgEncodeHaibTfbsSknshNrsfV0416101AlnRep0	SK-N-SH	REST	11029	spp.idrOptimal.bf.wgEncodeHaibTfbsSknshNrsfV0416101AlnRep0.bam_VS_wgEncodeHaibTfbsSknshRxlchPcr2xAlnRep0.bam.narrowPeak.gz
wgEncodeHaibTfbsU87NrsfPcr2xAlnRep0V2	U87	REST	11746	spp.idrOptimal.bf.wgEncodeHaibTfbsU87NrsfPcr2xAlnRep0V2.bam_VS_wgEncodeHaibTfbsU87RxlchPcr2xAlnRep0.bam.narrowPeak.gz
wgEncodeSydhTfbsGm12878Rfx5200401194IggmusAlnRep0	GM12878	RFX5	4341	spp.idrOptimal.bf.wgEncodeSydhTfbsGm12878Rfx5200401194IggmusAlnRep0.bam_VS_wgEncodeSydhTfbsGm12878InputIggmusAlnRep0.bam.narrowPeak.gz
wgEncodeSydhTfbsH1hescRfx5200401194IggrabAlnRep0	H1-hESC	RFX5	1695	spp.idrOptimal.bf.wgEncodeSydhTfbsH1hescRfx5200401194IggrabAlnRep0.bam_VS_wgEncodeSydhTfbsH1hescInputIggrabAln.bam.narrowPeak.gz
wgEncodeSydhTfbsHelas3Rfx5200401194IggrabAlnRep0	HeLa-S3	RFX5	19284	spp.idrOptimal.bf.wgEncodeSydhTfbsHelas3Rfx5200401194IggrabAlnRep0.bam_VS_wgEncodeSydhTfbsHelas3InputIggrabAlnRep1.bam.narrowPeak.gz
wgEncodeSydhTfbsHepg2Rfx5200401194IggrabAlnRep0	HepG2	RFX5	6017	spp.idrOptimal.bf.wgEncodeSydhTfbsHepg2Rfx5200401194IggrabAlnRep0.bam_VS_wgEncodeSydhTfbsHepg2InputIggrabAln.bam.narrowPeak.gz
wgEncodeSydhTfbsK562Rfx5IggrabAlnRep0	K562	RFX5	2201	spp.idrOptimal.bf.wgEncodeSydhTfbsK562Rfx5IggrabAlnRep0.bam_VS_wgEncodeSydhTfbsK562InputIggrabAln.bam.narrowPeak.gz
wgEncodeHaibTfbsGm12878Runx3sc101553V0422111AlnRep0	GM12878	RUNX3	67965	spp.idrOptimal.bf.wgEncodeHaibTfbsGm12878Runx3sc101553V0422111AlnRep0.bam_VS_wgEncodeHaibTfbsGm12878ControlV0422111AlnRep0.bam.narrowPeak.gz
wgEncodeHaibTfbsGm12878RxraPcr1xAlnRep0	GM12878	RXRA	1704	spp.idrOptimal.bf.wgEncodeHaibTfbsGm12878RxraPcr1xAlnRep0.bam_VS_wgEncodeHaibTfbsGm12878RxlchPcr1xAlnRep0.bam.narrowPeak.gz
wgEncodeHaibTfbsH1hescRxraV0416102AlnRep0	H1-hESC	RXRA	1306	spp.idrOptimal.bf.wgEncodeHaibTfbsH1hescRxraV0416102AlnRep0.bam_VS_wgEncodeHaibTfbsH1hescRxlchPcr1xAlnRep0.bam.narrowPeak.gz
wgEncodeHaibTfbsHepg2RxraPcr1xAlnRep0	HepG2	RXRA	17063	spp.idrOptimal.bf.wgEncodeHaibTfbsHepg2RxraPcr1xAlnRep0.bam_VS_wgEncodeHaibTfbsHepg2RxlchPcr1xAlnRep0.bam.narrowPeak.gz
wgEncodeBroadHistoneK562Sap3039731StdAlnRep0	K562	SAP30	9753	spp.idrOptimal.bf.wgEncodeBroadHistoneK562Sap3039731StdAlnRep0.bam_VS_wgEncodeBroadHistoneK562ControlStdAlnRep1.bam.narrowPeak.gz
wgEncodeSydhTfbsK562Setdb1MnasedUcdAlnRep0	K562	SETDB1	2967	spp.idrOptimal.bf.wgEncodeSydhTfbsK562Setdb1MnasedUcdAlnRep0.bam_VS_wgEncodeSydhTfbsK562InputUcdAlnRep1.bam.narrowPeak.gz
wgEncodeSydhTfbsK562Setdb1UcdAlnRep0	K562	SETDB1	3882	spp.idrOptimal.bf.wgEncodeSydhTfbsK562Setdb1UcdAlnRep0.bam_VS_wgEncodeSydhTfbsK562InputUcdAlnRep1.bam.narrowPeak.gz
wgEncodeSydhTfbsU2osSetdb1UcdAlnRep0	U2OS	SETDB1	23538	spp.idrOptimal.bf.wgEncodeSydhTfbsU2osSetdb1UcdAlnRep0.bam_VS_wgEncodeSydhTfbsU2osInputUcdAln.bam.narrowPeak.gz
wgEncodeHaibTfbsA549Sin3ak20V0422111Etoh02AlnRep0	A549	SIN3A	6024	spp.idrOptimal.bf.wgEncodeHaibTfbsA549Sin3ak20V0422111Etoh02AlnRep0.bam_VS_wgEncodeHaibTfbsA549RxlchPcr1xEtoh02AlnRep0.bam.narrowPeak.gz
wgEncodeSydhTfbsGm12878Sin3anb6001263IggmusAlnRep0	GM12878	SIN3A	10392	spp.idrOptimal.bf.wgEncodeSydhTfbsGm12878Sin3anb6001263IggmusAlnRep0.bam_VS_wgEncodeSydhTfbsGm12878InputIggmusAlnRep0.bam.narrowPeak.gz
wgEncodeSydhTfbsH1hescSin3anb6001263IggrabAlnRep0	H1-hESC	SIN3A	21309	spp.idrOptimal.bf.wgEncodeSydhTfbsH1hescSin3anb6001263IggrabAlnRep0.bam_VS_wgEncodeSydhTfbsH1hescInputIggrabAln.bam.narrowPeak.gz
wgEncodeHaibTfbsH1hescSin3ak20Pcr1xAlnRep0	H1-hESC	SIN3A	8977	spp.idrOptimal.bf.wgEncodeHaibTfbsH1hescSin3ak20Pcr1xAlnRep0.bam_VS_wgEncodeHaibTfbsH1hescRxlchPcr1xAlnRep0.bam.narrowPeak.gz
wgEncodeHaibTfbsHepg2Sin3ak20Pcr1xAlnRep0	HepG2	SIN3A	16459	spp.idrOptimal.bf.wgEncodeHaibTfbsHepg2Sin3ak20Pcr1xAlnRep0.bam_VS_wgEncodeHaibTfbsHepg2RxlchPcr1xAlnRep0.bam.narrowPeak.gz
wgEncodeHaibTfbsK562Sin3ak20V0416101AlnRep0	K562	SIN3A	12700	spp.idrOptimal.bf.wgEncodeHaibTfbsK562Sin3ak20V0416101AlnRep0.bam_VS_wgEncodeHaibTfbsK562RxlchPcr1xAlnRep0.bam.narrowPeak.gz
wgEncodeHaibTfbsPanc1Sin3ak20V0416101AlnRep0	PANC-1	SIN3A	7182	spp.idrOptimal.bf.wgEncodeHaibTfbsPanc1Sin3ak20V0416101AlnRep0.bam_VS_wgEncodeHaibTfbsPanc1RxlchPcr2xAlnRep0.bam.narrowPeak.gz
wgEncodeHaibTfbsPfsk1Sin3ak20V0416101AlnRep0	PFSK-1	SIN3A	5950	spp.idrOptimal.bf.wgEncodeHaibTfbsPfsk1Sin3ak20V0416101AlnRep0.bam_VS_wgEncodeHaibTfbsPfsk1RxlchPcr2xAlnRep0.bam.narrowPeak.gz
wgEncodeHaibTfbsSknshSin3ak20V0416101AlnRep0	SK-N-SH	SIN3A	15561	spp.idrOptimal.bf.wgEncodeHaibTfbsSknshSin3ak20V0416101AlnRep0.bam_VS_wgEncodeHaibTfbsSknshRxlchPcr2xAlnRep0.bam.narrowPeak.gz
wgEncodeSydhTfbsK562Sirt6StdAlnRep0	K562	SIRT6	2305	spp.idrOptimal.bf.wgEncodeSydhTfbsK562Sirt6StdAlnRep0.bam_VS_wgEncodeSydhTfbsK562InputStdAlnRep0.bam.narrowPeak.gz
wgEncodeHaibTfbsA549Six5V0422111Etoh02AlnRep0	A549	SIX5	4909	spp.idrOptimal.bf.wgEncodeHaibTfbsA549Six5V0422111Etoh02AlnRep0.bam_VS_wgEncodeHaibTfbsA549RxlchPcr1xEtoh02AlnRep0.bam.narrowPeak.gz
wgEncodeHaibTfbsGm12878Six5Pcr1xAlnRep0	GM12878	SIX5	4839	spp.idrOptimal.bf.wgEncodeHaibTfbsGm12878Six5Pcr1xAlnRep0.bam_VS_wgEncodeHaibTfbsGm12878RxlchPcr1xAlnRep0.bam.narrowPeak.gz
wgEncodeHaibTfbsH1hescSix5Pcr1xAlnRep0	H1-hESC	SIX5	3425	spp.idrOptimal.bf.wgEncodeHaibTfbsH1hescSix5Pcr1xAlnRep0.bam_VS_wgEncodeHaibTfbsH1hescRxlchPcr1xAlnRep0.bam.narrowPeak.gz
wgEncodeHaibTfbsK562Six5Pcr1xAlnRep0	K562	SIX5	4194	spp.idrOptimal.bf.wgEncodeHaibTfbsK562Six5Pcr1xAlnRep0.bam_VS_wgEncodeHaibTfbsK562RxlchPcr1xAlnRep0.bam.narrowPeak.gz
wgEncodeSydhTfbsHelas3Brg1IggmusAlnRep0	HeLa-S3	SMARCA4	1357	spp.idrOptimal.bf.wgEncodeSydhTfbsHelas3Brg1IggmusAlnRep0.bam_VS_wgEncodeSydhTfbsHelas3InputIggmusAlnRep0.bam.narrowPeak.gz
wgEncodeSydhTfbsK562Brg1IggmusAlnRep0	K562	SMARCA4	2463	spp.idrOptimal.bf.wgEncodeSydhTfbsK562Brg1IggmusAlnRep0.bam_VS_wgEncodeSydhTfbsK562InputIggmusAlnRep0.bam.narrowPeak.gz
wgEncodeSydhTfbsHelas3Ini1IggmusAlnRep0	HeLa-S3	SMARCB1	7780	spp.idrOptimal.bf.wgEncodeSydhTfbsHelas3Ini1IggmusAlnRep0.bam_VS_wgEncodeSydhTfbsHelas3InputIggmusAlnRep0.bam.narrowPeak.gz
wgEncodeSydhTfbsK562Ini1IggmusAlnRep0	K562	SMARCB1	1942	spp.idrOptimal.bf.wgEncodeSydhTfbsK562Ini1IggmusAlnRep0.bam_VS_wgEncodeSydhTfbsK562InputIggmusAlnRep0.bam.narrowPeak.gz
wgEncodeSydhTfbsHelas3Baf155IggmusAlnRep0	HeLa-S3	SMARCC1	8650	spp.idrOptimal.bf.wgEncodeSydhTfbsHelas3Baf155IggmusAlnRep0.bam_VS_wgEncodeSydhTfbsHelas3InputIggmusAlnRep0.bam.narrowPeak.gz
wgEncodeSydhTfbsHelas3Baf170IggmusAlnRep0	HeLa-S3	SMARCC2	2632	spp.idrOptimal.bf.wgEncodeSydhTfbsHelas3Baf170IggmusAlnRep0.bam_VS_wgEncodeSydhTfbsHelas3InputIggmusAlnRep0.bam.narrowPeak.gz
wgEncodeSydhTfbsGm12878Smc3ab9263IggmusAlnRep0	GM12878	SMC3	30517	spp.idrOptimal.bf.wgEncodeSydhTfbsGm12878Smc3ab9263IggmusAlnRep0.bam_VS_wgEncodeSydhTfbsGm12878InputIggmusAlnRep0.bam.narrowPeak.gz
wgEncodeSydhTfbsHelas3Smc3ab9263IggrabAlnRep0	HeLa-S3	SMC3	39567	spp.idrOptimal.bf.wgEncodeSydhTfbsHelas3Smc3ab9263IggrabAlnRep0.bam_VS_wgEncodeSydhTfbsHelas3InputIggrabAlnRep1.bam.narrowPeak.gz
wgEncodeSydhTfbsHepg2Smc3ab9263IggrabAlnRep0	HepG2	SMC3	30797	spp.idrOptimal.bf.wgEncodeSydhTfbsHepg2Smc3ab9263IggrabAlnRep0.bam_VS_wgEncodeSydhTfbsHepg2InputIggrabAln.bam.narrowPeak.gz
wgEncodeSydhTfbsK562Smc3ab9263IggrabAlnRep0	K562	SMC3	23598	spp.idrOptimal.bf.wgEncodeSydhTfbsK562Smc3ab9263IggrabAlnRep0.bam_VS_wgEncodeSydhTfbsK562InputIggrabAln.bam.narrowPeak.gz
wgEncodeHaibTfbsGm12878Sp1Pcr1xAlnRep0	GM12878	SP1	18248	spp.idrOptimal.bf.wgEncodeHaibTfbsGm12878Sp1Pcr1xAlnRep0.bam_VS_wgEncodeHaibTfbsGm12878RxlchPcr1xAlnRep0.bam.narrowPeak.gz
wgEncodeHaibTfbsH1hescSp1Pcr1xAlnRep0	H1-hESC	SP1	15110	spp.idrOptimal.bf.wgEncodeHaibTfbsH1hescSp1Pcr1xAlnRep0.bam_VS_wgEncodeHaibTfbsH1hescRxlchPcr1xAlnRep0.bam.narrowPeak.gz
wgEncodeHaibTfbsHepg2Sp1Pcr1xAlnRep0	HepG2	SP1	25477	spp.idrOptimal.bf.wgEncodeHaibTfbsHepg2Sp1Pcr1xAlnRep0.bam_VS_wgEncodeHaibTfbsHepg2RxlchPcr1xAlnRep0.bam.narrowPeak.gz
wgEncodeHaibTfbsK562Sp1Pcr1xAlnRep0	K562	SP1	7206	spp.idrOptimal.bf.wgEncodeHaibTfbsK562Sp1Pcr1xAlnRep0.bam_VS_wgEncodeHaibTfbsK562RxlchPcr1xAlnRep0.bam.narrowPeak.gz
wgEncodeHaibTfbsH1hescSp2V0422111AlnRep0	H1-hESC	SP2	2469	spp.idrOptimal.bf.wgEncodeHaibTfbsH1hescSp2V0422111AlnRep0.bam_VS_wgEncodeHaibTfbsH1hescControlV0422111AlnRep1.bam.narrowPeak.gz
wgEncodeHaibTfbsHepg2Sp2V0422111AlnRep0	HepG2	SP2	2626	spp.idrOptimal.bf.wgEncodeHaibTfbsHepg2Sp2V0422111AlnRep0.bam_VS_wgEncodeHaibTfbsHepg2RxlchPcr1xAlnRep0.bam.narrowPeak.gz
wgEncodeHaibTfbsK562Sp2sc643V0416102AlnRep0	K562	SP2	3124	spp.idrOptimal.bf.wgEncodeHaibTfbsK562Sp2sc643V0416102AlnRep0.bam_VS_wgEncodeHaibTfbsK562RxlchPcr1xAlnRep0.bam.narrowPeak.gz
wgEncodeHaibTfbsH1hescSp4v20V0422111AlnRep0	H1-hESC	SP4	5752	spp.idrOptimal.bf.wgEncodeHaibTfbsH1hescSp4v20V0422111AlnRep0.bam_VS_wgEncodeHaibTfbsH1hescControlV0422111AlnRep1.bam.narrowPeak.gz
wgEncodeHaibTfbsGm12878Pu1Pcr1xAlnRep0	GM12878	SPI1	42938	spp.idrOptimal.bf.wgEncodeHaibTfbsGm12878Pu1Pcr1xAlnRep0.bam_VS_wgEncodeHaibTfbsGm12878RxlchPcr1xAlnRep0.bam.narrowPeak.gz
wgEncodeHaibTfbsGm12891Pu1Pcr1xAlnRep0	GM12891	SPI1	48830	spp.idrOptimal.bf.wgEncodeHaibTfbsGm12891Pu1Pcr1xAlnRep0.bam_VS_wgEncodeHaibTfbsGm12891RxlchPcr1xAlnRep0.bam.narrowPeak.gz
wgEncodeHaibTfbsK562Pu1Pcr1xAlnRep0	K562	SPI1	28677	spp.idrOptimal.bf.wgEncodeHaibTfbsK562Pu1Pcr1xAlnRep0.bam_VS_wgEncodeHaibTfbsK562RxlchPcr1xAlnRep0.bam.narrowPeak.gz
wgEncodeSydhTfbsHepg2Srebp1InslnStdAlnRep0	HepG2	SREBF1	2585	spp.idrOptimal.bf.wgEncodeSydhTfbsHepg2Srebp1InslnStdAlnRep0.bam_VS_wgEncodeSydhTfbsHepg2InputInslnStdAlnRep0.bam.narrowPeak.gz
wgEncodeSydhTfbsHepg2Srebp1PravastStdAlnRep0	HepG2	SREBF1	476	spp.idrOptimal.bf.wgEncodeSydhTfbsHepg2Srebp1PravastStdAlnRep0.bam_VS_wgEncodeSydhTfbsHepg2InputPravastStdAlnRep0.bam.narrowPeak.gz
wgEncodeSydhTfbsHepg2Srebp2PravastStdAlnRep0	HepG2	SREBF2	283	spp.idrOptimal.bf.wgEncodeSydhTfbsHepg2Srebp2PravastStdAlnRep0.bam_VS_wgEncodeSydhTfbsHepg2InputPravastStdAlnRep0.bam.narrowPeak.gz
wgEncodeHaibTfbsGm12878SrfPcr2xAlnRep0	GM12878	SRF	8544	spp.idrOptimal.bf.wgEncodeHaibTfbsGm12878SrfPcr2xAlnRep0.bam_VS_wgEncodeHaibTfbsGm12878RxlchPcr1xAlnRep0.bam.narrowPeak.gz
wgEncodeHaibTfbsH1hescSrfPcr1xAlnRep0	H1-hESC	SRF	5105	spp.idrOptimal.bf.wgEncodeHaibTfbsH1hescSrfPcr1xAlnRep0.bam_VS_wgEncodeHaibTfbsH1hescRxlchPcr1xAlnRep0.bam.narrowPeak.gz
wgEncodeHaibTfbsHepg2SrfV0416101AlnRep0	HepG2	SRF	5314	spp.idrOptimal.bf.wgEncodeHaibTfbsHepg2SrfV0416101AlnRep0.bam_VS_wgEncodeHaibTfbsHepg2RxlchPcr1xAlnRep0.bam.narrowPeak.gz
wgEncodeHaibTfbsK562SrfV0416101AlnRep0	K562	SRF	4717	spp.idrOptimal.bf.wgEncodeHaibTfbsK562SrfV0416101AlnRep0.bam_VS_wgEncodeHaibTfbsK562RxlchPcr1xAlnRep0.bam.narrowPeak.gz
wgEncodeSydhTfbsGm12878Stat1StdAlnRep0	GM12878	STAT1	1769	spp.idrOptimal.bf.wgEncodeSydhTfbsGm12878Stat1StdAlnRep0.bam_VS_wgEncodeSydhTfbsGm12878InputStdAlnRep1.bam.narrowPeak.gz
wgEncodeSydhTfbsHelas3Stat1Ifng30StdAlnRep0	HeLa-S3	STAT1	16158	spp.idrOptimal.bf.wgEncodeSydhTfbsHelas3Stat1Ifng30StdAlnRep0.bam_VS_wgEncodeSydhTfbsHelas3InputIfng30StdAlnRep1.bam.narrowPeak.gz
wgEncodeUchicagoTfbsK562Stat1Controlstat1AlnRep0	K562	STAT1	52	spp.idrOptimal.bf.wgEncodeUchicagoTfbsK562Stat1Controlstat1AlnRep0.bam_VS_wgEncodeUchicagoTfbsK562InputControlstat1AlnRep1.bam.narrowPeak.gz
wgEncodeSydhTfbsK562Stat1Ifng30StdAlnRep0	K562	STAT1	2203	spp.idrOptimal.bf.wgEncodeSydhTfbsK562Stat1Ifng30StdAlnRep0.bam_VS_wgEncodeSydhTfbsK562InputIfng30StdAlnRep1.bam.narrowPeak.gz
wgEncodeSydhTfbsK562Stat1Ifng6hStdAlnRep0	K562	STAT1	2333	spp.idrOptimal.bf.wgEncodeSydhTfbsK562Stat1Ifng6hStdAlnRep0.bam_VS_wgEncodeSydhTfbsK562InputIfng6hStdAlnRep1.bam.narrowPeak.gz
wgEncodeSydhTfbsK562Stat1Ifna30StdAlnRep0	K562	STAT1	1503	spp.idrOptimal.bf.wgEncodeSydhTfbsK562Stat1Ifna30StdAlnRep0.bam_VS_wgEncodeSydhTfbsK562InputIfna30StdAlnRep1.bam.narrowPeak.gz
wgEncodeSydhTfbsK562Stat1Ifna6hStdAlnRep0	K562	STAT1	1476	spp.idrOptimal.bf.wgEncodeSydhTfbsK562Stat1Ifna6hStdAlnRep0.bam_VS_wgEncodeSydhTfbsK562InputIfna6hStdAlnRep1.bam.narrowPeak.gz
wgEncodeSydhTfbsK562Stat2Ifna30StdAlnRep0	K562	STAT2	3040	spp.idrOptimal.bf.wgEncodeSydhTfbsK562Stat2Ifna30StdAlnRep0.bam_VS_wgEncodeSydhTfbsK562InputIfna30StdAlnRep1.bam.narrowPeak.gz
wgEncodeSydhTfbsK562Stat2Ifna6hStdAlnRep0	K562	STAT2	1923	spp.idrOptimal.bf.wgEncodeSydhTfbsK562Stat2Ifna6hStdAlnRep0.bam_VS_wgEncodeSydhTfbsK562InputIfna6hStdAlnRep1.bam.narrowPeak.gz
wgEncodeSydhTfbsGm12878Stat3IggmusAlnRep0	GM12878	STAT3	6487	spp.idrOptimal.bf.wgEncodeSydhTfbsGm12878Stat3IggmusAlnRep0.bam_VS_wgEncodeSydhTfbsGm12878InputIggmusAlnRep0.bam.narrowPeak.gz
wgEncodeSydhTfbsHelas3Stat3IggrabAlnRep0	HeLa-S3	STAT3	13834	spp.idrOptimal.bf.wgEncodeSydhTfbsHelas3Stat3IggrabAlnRep0.bam_VS_wgEncodeSydhTfbsHelas3InputIggrabAlnRep1.bam.narrowPeak.gz
wgEncodeSydhTfbsMcf10aesStat3Tam112hHvdAlnRep0	MCF10A-Er-Src	STAT3	39908	spp.idrOptimal.bf.wgEncodeSydhTfbsMcf10aesStat3Tam112hHvdAlnRep0.bam_VS_wgEncodeSydhTfbsMcf10aesInputHvdAlnRep1.bam.narrowPeak.gz
wgEncodeSydhTfbsMcf10aesStat3TamStdAlnRep0	MCF10A-Er-Src	STAT3	44494	spp.idrOptimal.bf.wgEncodeSydhTfbsMcf10aesStat3TamStdAlnRep0.bam_VS_wgEncodeSydhTfbsMcf10aesInputStdAln.bam.narrowPeak.gz
wgEncodeSydhTfbsMcf10aesStat3Etoh01StdAlnRep0	MCF10A-Er-Src	STAT3	12334	spp.idrOptimal.bf.wgEncodeSydhTfbsMcf10aesStat3Etoh01StdAlnRep0.bam_VS_wgEncodeSydhTfbsMcf10aesInputStdAln.bam.narrowPeak.gz
wgEncodeSydhTfbsMcf10aesStat3Etoh01cStdAlnRep0	MCF10A-Er-Src	STAT3	41355	spp.idrOptimal.bf.wgEncodeSydhTfbsMcf10aesStat3Etoh01cStdAlnRep0.bam_VS_wgEncodeSydhTfbsMcf10aesInputEtoh01cStdAln.bam.narrowPeak.gz
wgEncodeSydhTfbsMcf10aesStat3Etoh01bStdAlnRep0	MCF10A-Er-Src	STAT3	45110	spp.idrOptimal.bf.wgEncodeSydhTfbsMcf10aesStat3Etoh01bStdAlnRep0.bam_VS_wgEncodeSydhTfbsMcf10aesInputEtoh01bStdAln.bam.narrowPeak.gz
wgEncodeHaibTfbsGm12878Stat5asc74442V0422111AlnRep0	GM12878	STAT5A	7423	spp.idrOptimal.bf.wgEncodeHaibTfbsGm12878Stat5asc74442V0422111AlnRep0.bam_VS_wgEncodeHaibTfbsGm12878ControlV0422111AlnRep0.bam.narrowPeak.gz
wgEncodeHaibTfbsK562Stat5asc74442V0422111AlnRep0	K562	STAT5A	9811	spp.idrOptimal.bf.wgEncodeHaibTfbsK562Stat5asc74442V0422111AlnRep0.bam_VS_wgEncodeHaibTfbsK562ControlV0422111AlnRep1.bam.narrowPeak.gz
wgEncodeSydhTfbsH1hescSuz12UcdAlnRep0	H1-hESC	SUZ12	4789	spp.idrOptimal.bf.wgEncodeSydhTfbsH1hescSuz12UcdAlnRep0.bam_VS_wgEncodeSydhTfbsH1hescInputUcdAln.bam.narrowPeak.gz
wgEncodeSydhTfbsNt2d1Suz12UcdAlnRep0	NT2-D1	SUZ12	3308	spp.idrOptimal.bf.wgEncodeSydhTfbsNt2d1Suz12UcdAlnRep0.bam_VS_wgEncodeSydhTfbsNt2d1InputUcdAlnRep1.bam.narrowPeak.gz
wgEncodeSydhTfbsK562Tal1sc12984IggmusAlnRep0	K562	TAL1	26260	spp.idrOptimal.bf.wgEncodeSydhTfbsK562Tal1sc12984IggmusAlnRep0.bam_VS_wgEncodeSydhTfbsK562InputIggmusAlnRep0.bam.narrowPeak.gz
wgEncodeSydhTfbsGm12878Tblr1ab24550IggmusAlnRep0	GM12878	TBL1XR1	13702	spp.idrOptimal.bf.wgEncodeSydhTfbsGm12878Tblr1ab24550IggmusAlnRep0.bam_VS_wgEncodeSydhTfbsGm12878InputIggmusAlnRep0.bam.narrowPeak.gz
wgEncodeSydhTfbsK562Tblr1ab24550IggrabAlnRep0	K562	TBL1XR1	5086	spp.idrOptimal.bf.wgEncodeSydhTfbsK562Tblr1ab24550IggrabAlnRep0.bam_VS_wgEncodeSydhTfbsK562InputIggrabAln.bam.narrowPeak.gz
wgEncodeSydhTfbsK562Tblr1nb600270IggrabAlnRep0	K562	TBL1XR1	8505	spp.idrOptimal.bf.wgEncodeSydhTfbsK562Tblr1nb600270IggrabAlnRep0.bam_VS_wgEncodeSydhTfbsK562InputIggrabAln.bam.narrowPeak.gz
wgEncodeHaibTfbsA549Tcf12V0422111Etoh02AlnRep0	A549	TCF12	20896	spp.idrOptimal.bf.wgEncodeHaibTfbsA549Tcf12V0422111Etoh02AlnRep0.bam_VS_wgEncodeHaibTfbsA549RxlchPcr1xEtoh02AlnRep0.bam.narrowPeak.gz
wgEncodeHaibTfbsGm12878Tcf12Pcr1xAlnRep0	GM12878	TCF12	20437	spp.idrOptimal.bf.wgEncodeHaibTfbsGm12878Tcf12Pcr1xAlnRep0.bam_VS_wgEncodeHaibTfbsGm12878RxlchPcr1xAlnRep0.bam.narrowPeak.gz
wgEncodeHaibTfbsH1hescTcf12Pcr1xAlnRep0	H1-hESC	TCF12	7833	spp.idrOptimal.bf.wgEncodeHaibTfbsH1hescTcf12Pcr1xAlnRep0.bam_VS_wgEncodeHaibTfbsH1hescRxlchPcr1xAlnRep0.bam.narrowPeak.gz
wgEncodeHaibTfbsHepg2Tcf12Pcr1xAlnRep0	HepG2	TCF12	2061	spp.idrOptimal.bf.wgEncodeHaibTfbsHepg2Tcf12Pcr1xAlnRep0.bam_VS_wgEncodeHaibTfbsHepg2RxlchPcr1xAlnRep0.bam.narrowPeak.gz
wgEncodeHaibTfbsGm12878Tcf3Pcr1xAlnRep0	GM12878	TCF3	16021	spp.idrOptimal.bf.wgEncodeHaibTfbsGm12878Tcf3Pcr1xAlnRep0.bam_VS_wgEncodeHaibTfbsGm12878RxlchPcr1xAlnRep0.bam.narrowPeak.gz
wgEncodeSydhTfbsHct116Tcf7l2UcdAlnRep0	HCT-116	TCF7L2	19463	spp.idrOptimal.bf.wgEncodeSydhTfbsHct116Tcf7l2UcdAlnRep0.bam_VS_wgEncodeSydhTfbsHct116InputUcdAlnRep1.bam.narrowPeak.gz
wgEncodeSydhTfbsHek293Tcf7l2UcdAlnRep0	HEK293	TCF7L2	8961	spp.idrOptimal.bf.wgEncodeSydhTfbsHek293Tcf7l2UcdAlnRep0.bam_VS_wgEncodeSydhTfbsHek293InputUcdAln.bam.narrowPeak.gz
wgEncodeSydhTfbsHelas3Tcf7l2UcdAlnRep0	HeLa-S3	TCF7L2	3198	spp.idrOptimal.bf.wgEncodeSydhTfbsHelas3Tcf7l2UcdAlnRep0.bam_VS_wgEncodeSydhTfbsHelas3InputUcdAln.bam.narrowPeak.gz
wgEncodeSydhTfbsHelas3Tcf7l2c9b92565UcdAlnRep0	HeLa-S3	TCF7L2	19242	spp.idrOptimal.bf.wgEncodeSydhTfbsHelas3Tcf7l2c9b92565UcdAlnRep0.bam_VS_wgEncodeSydhTfbsHelas3InputUcdAln.bam.narrowPeak.gz
wgEncodeSydhTfbsHepg2Tcf7l2UcdAlnRep0	HepG2	TCF7L2	2742	spp.idrOptimal.bf.wgEncodeSydhTfbsHepg2Tcf7l2UcdAlnRep0.bam_VS_wgEncodeSydhTfbsHepg2InputUcdAlnRep1.bam.narrowPeak.gz
wgEncodeSydhTfbsMcf7Tcf7l2UcdAlnRep0	MCF-7	TCF7L2	10293	spp.idrOptimal.bf.wgEncodeSydhTfbsMcf7Tcf7l2UcdAlnRep0.bam_VS_wgEncodeSydhTfbsMcf7InputUcdAlnRep0.bam.narrowPeak.gz
wgEncodeSydhTfbsPanc1Tcf7l2UcdAlnRep0	PANC-1	TCF7L2	13366	spp.idrOptimal.bf.wgEncodeSydhTfbsPanc1Tcf7l2UcdAlnRep0.bam_VS_wgEncodeSydhTfbsPanc1InputUcdAlnRep1.bam.narrowPeak.gz
wgEncodeHaibTfbsH1hescTead4sc101184V0422111AlnRep0	H1-hESC	TEAD4	19857	spp.idrOptimal.bf.wgEncodeHaibTfbsH1hescTead4sc101184V0422111AlnRep0.bam_VS_wgEncodeHaibTfbsH1hescControlV0422111AlnRep1.bam.narrowPeak.gz
wgEncodeHaibTfbsHepg2Tead4sc101184V0422111AlnRep0	HepG2	TEAD4	15160	spp.idrOptimal.bf.wgEncodeHaibTfbsHepg2Tead4sc101184V0422111AlnRep0.bam_VS_wgEncodeHaibTfbsHepg2RxlchPcr1xAlnRep0.bam.narrowPeak.gz
wgEncodeHaibTfbsK562Tead4sc101184V0422111AlnRep0	K562	TEAD4	31030	spp.idrOptimal.bf.wgEncodeHaibTfbsK562Tead4sc101184V0422111AlnRep0.bam_VS_wgEncodeHaibTfbsK562ControlV0422111AlnRep1.bam.narrowPeak.gz
wgEncodeSydhTfbsHelas3Ap2alphaStdAlnRep0	HeLa-S3	TFAP2A	18970	spp.idrOptimal.bf.wgEncodeSydhTfbsHelas3Ap2alphaStdAlnRep0.bam_VS_wgEncodeSydhTfbsHelas3InputStdAlnRep1.bam.narrowPeak.gz
wgEncodeSydhTfbsHelas3Ap2gammaStdAlnRep0	HeLa-S3	TFAP2C	25452	spp.idrOptimal.bf.wgEncodeSydhTfbsHelas3Ap2gammaStdAlnRep0.bam_VS_wgEncodeSydhTfbsHelas3InputStdAlnRep1.bam.narrowPeak.gz
wgEncodeHaibTfbsK562Thap1sc98174V0416101AlnRep0	K562	THAP1	3506	spp.idrOptimal.bf.wgEncodeHaibTfbsK562Thap1sc98174V0416101AlnRep0.bam_VS_wgEncodeHaibTfbsK562RxlchPcr1xAlnRep0.bam.narrowPeak.gz
wgEncodeSydhTfbsHek293Kap1UcdAlnRep0	HEK293	TRIM28	19774	spp.idrOptimal.bf.wgEncodeSydhTfbsHek293Kap1UcdAlnRep0.bam_VS_wgEncodeSydhTfbsHek293InputUcdAln.bam.narrowPeak.gz
wgEncodeSydhTfbsK562Kap1UcdAlnRep0	K562	TRIM28	5489	spp.idrOptimal.bf.wgEncodeSydhTfbsK562Kap1UcdAlnRep0.bam_VS_wgEncodeSydhTfbsK562InputUcdAlnRep1.bam.narrowPeak.gz
wgEncodeHaibTfbsK562Trim28sc81411V0422111AlnRep0	K562	TRIM28	12137	spp.idrOptimal.bf.wgEncodeHaibTfbsK562Trim28sc81411V0422111AlnRep0.bam_VS_wgEncodeHaibTfbsK562ControlV0422111AlnRep1.bam.narrowPeak.gz
wgEncodeSydhTfbsU2osKap1UcdAlnRep0	U2OS	TRIM28	14647	spp.idrOptimal.bf.wgEncodeSydhTfbsU2osKap1UcdAlnRep0.bam_VS_wgEncodeSydhTfbsU2osInputUcdAln.bam.narrowPeak.gz
wgEncodeSydhTfbsK562Ubfsc13125IggmusAlnRep0	K562	UBTF	6002	spp.idrOptimal.bf.wgEncodeSydhTfbsK562Ubfsc13125IggmusAlnRep0.bam_VS_wgEncodeSydhTfbsK562InputIggmusAlnRep0.bam.narrowPeak.gz
wgEncodeSydhTfbsK562Ubtfsab1404509IggmusAlnRep0	K562	UBTF	13692	spp.idrOptimal.bf.wgEncodeSydhTfbsK562Ubtfsab1404509IggmusAlnRep0.bam_VS_wgEncodeSydhTfbsK562InputIggmusAlnRep0.bam.narrowPeak.gz
wgEncodeHaibTfbsA549Usf1Pcr1xDex100nmAlnRep0	A549	USF1	11980	spp.idrOptimal.bf.wgEncodeHaibTfbsA549Usf1Pcr1xDex100nmAlnRep0.bam_VS_wgEncodeHaibTfbsA549RxlchPcr1xDex100nmAlnRep0.bam.narrowPeak.gz
wgEncodeHaibTfbsA549Usf1Pcr1xEtoh02AlnRep0	A549	USF1	11932	spp.idrOptimal.bf.wgEncodeHaibTfbsA549Usf1Pcr1xEtoh02AlnRep0.bam_VS_wgEncodeHaibTfbsA549RxlchPcr1xEtoh02AlnRep0.bam.narrowPeak.gz
wgEncodeHaibTfbsA549Usf1V0422111Etoh02AlnRep0	A549	USF1	8004	spp.idrOptimal.bf.wgEncodeHaibTfbsA549Usf1V0422111Etoh02AlnRep0.bam_VS_wgEncodeHaibTfbsA549RxlchPcr1xEtoh02AlnRep0.bam.narrowPeak.gz
wgEncodeHaibTfbsGm12878Usf1Pcr2xAlnRep0	GM12878	USF1	9778	spp.idrOptimal.bf.wgEncodeHaibTfbsGm12878Usf1Pcr2xAlnRep0.bam_VS_wgEncodeHaibTfbsGm12878RxlchPcr1xAlnRep0.bam.narrowPeak.gz
wgEncodeHaibTfbsH1hescUsf1Pcr1xAlnRep0	H1-hESC	USF1	26042	spp.idrOptimal.bf.wgEncodeHaibTfbsH1hescUsf1Pcr1xAlnRep0.bam_VS_wgEncodeHaibTfbsH1hescRxlchPcr1xAlnRep0.bam.narrowPeak.gz
wgEncodeHaibTfbsHepg2Usf1Pcr1xAlnRep0	HepG2	USF1	21890	spp.idrOptimal.bf.wgEncodeHaibTfbsHepg2Usf1Pcr1xAlnRep0.bam_VS_wgEncodeHaibTfbsHepg2RxlchPcr1xAlnRep0.bam.narrowPeak.gz
wgEncodeHaibTfbsK562Usf1V0416101AlnRep0	K562	USF1	18521	spp.idrOptimal.bf.wgEncodeHaibTfbsK562Usf1V0416101AlnRep0.bam_VS_wgEncodeHaibTfbsK562RxlchPcr1xAlnRep0.bam.narrowPeak.gz
wgEncodeHaibTfbsSknshraUsf1sc8983V0416102AlnRep0	SK-N-SH_RA	USF1	19622	spp.idrOptimal.bf.wgEncodeHaibTfbsSknshraUsf1sc8983V0416102AlnRep0.bam_VS_wgEncodeHaibTfbsSknshraRxlchV0416102AlnRep1.bam.narrowPeak.gz
wgEncodeSydhTfbsGm12878Usf2IggmusAlnRep0	GM12878	USF2	9022	spp.idrOptimal.bf.wgEncodeSydhTfbsGm12878Usf2IggmusAlnRep0.bam_VS_wgEncodeSydhTfbsGm12878InputIggmusAlnRep0.bam.narrowPeak.gz
wgEncodeSydhTfbsH1hescUsf2IggrabAlnRep0	H1-hESC	USF2	6952	spp.idrOptimal.bf.wgEncodeSydhTfbsH1hescUsf2IggrabAlnRep0.bam_VS_wgEncodeSydhTfbsH1hescInputIggrabAln.bam.narrowPeak.gz
wgEncodeSydhTfbsHelas3Usf2IggmusAlnRep0	HeLa-S3	USF2	12306	spp.idrOptimal.bf.wgEncodeSydhTfbsHelas3Usf2IggmusAlnRep0.bam_VS_wgEncodeSydhTfbsHelas3InputIggmusAlnRep0.bam.narrowPeak.gz
wgEncodeSydhTfbsHepg2Usf2IggrabAlnRep0	HepG2	USF2	6291	spp.idrOptimal.bf.wgEncodeSydhTfbsHepg2Usf2IggrabAlnRep0.bam_VS_wgEncodeSydhTfbsHepg2InputIggrabAln.bam.narrowPeak.gz
wgEncodeSydhTfbsK562Usf2IggrabAlnRep0	K562	USF2	3083	spp.idrOptimal.bf.wgEncodeSydhTfbsK562Usf2IggrabAlnRep0.bam_VS_wgEncodeSydhTfbsK562InputIggrabAln.bam.narrowPeak.gz
wgEncodeSydhTfbsGm12878WhipIggmusAlnRep0	GM12878	WRNIP1	14102	spp.idrOptimal.bf.wgEncodeSydhTfbsGm12878WhipIggmusAlnRep0.bam_VS_wgEncodeSydhTfbsGm12878InputIggmusAlnRep0.bam.narrowPeak.gz
wgEncodeSydhTfbsK562Xrcc4StdAlnRep0	K562	XRCC4	4	spp.idrOptimal.bf.wgEncodeSydhTfbsK562Xrcc4StdAlnRep0.bam_VS_wgEncodeSydhTfbsK562InputStdAlnRep0.bam.narrowPeak.gz
wgEncodeHaibTfbsA549Yy1cV0422111Etoh02AlnRep0	A549	YY1	10259	spp.idrOptimal.bf.wgEncodeHaibTfbsA549Yy1cV0422111Etoh02AlnRep0.bam_VS_wgEncodeHaibTfbsA549RxlchPcr1xEtoh02AlnRep0.bam.narrowPeak.gz
wgEncodeSydhTfbsGm12878Yy1StdAlnRep0	GM12878	YY1	2077	spp.idrOptimal.bf.wgEncodeSydhTfbsGm12878Yy1StdAlnRep0.bam_VS_wgEncodeSydhTfbsGm12878InputStdAlnRep1.bam.narrowPeak.gz
wgEncodeHaibTfbsGm12878Yy1sc281Pcr1xAlnRep0	GM12878	YY1	30994	spp.idrOptimal.bf.wgEncodeHaibTfbsGm12878Yy1sc281Pcr1xAlnRep0.bam_VS_wgEncodeHaibTfbsGm12878RxlchPcr1xAlnRep0.bam.narrowPeak.gz
wgEncodeHaibTfbsGm12891Yy1sc281V0416101AlnRep0	GM12891	YY1	13593	spp.idrOptimal.bf.wgEncodeHaibTfbsGm12891Yy1sc281V0416101AlnRep0.bam_VS_wgEncodeHaibTfbsGm12891RxlchPcr1xAlnRep0.bam.narrowPeak.gz
wgEncodeHaibTfbsGm12892Yy1V0416101AlnRep0	GM12892	YY1	15951	spp.idrOptimal.bf.wgEncodeHaibTfbsGm12892Yy1V0416101AlnRep0.bam_VS_wgEncodeHaibTfbsGm12892RxlchV0416101AlnRep0.bam.narrowPeak.gz
wgEncodeHaibTfbsH1hescYy1sc281V0416102AlnRep0	H1-hESC	YY1	18328	spp.idrOptimal.bf.wgEncodeHaibTfbsH1hescYy1sc281V0416102AlnRep0.bam_VS_wgEncodeHaibTfbsH1hescRxlchPcr1xAlnRep0.bam.narrowPeak.gz
wgEncodeHaibTfbsHct116Yy1sc281V0416101AlnRep0	HCT-116	YY1	12749	spp.idrOptimal.bf.wgEncodeHaibTfbsHct116Yy1sc281V0416101AlnRep0.bam_VS_wgEncodeHaibTfbsHct116RxlchV0416101AlnRep1.bam.narrowPeak.gz
wgEncodeHaibTfbsHepg2Yy1sc281V0416101AlnRep0	HepG2	YY1	17876	spp.idrOptimal.bf.wgEncodeHaibTfbsHepg2Yy1sc281V0416101AlnRep0.bam_VS_wgEncodeHaibTfbsHepg2RxlchPcr1xAlnRep0.bam.narrowPeak.gz
wgEncodeHaibTfbsK562Yy1V0416101AlnRep0	K562	YY1	12677	spp.idrOptimal.bf.wgEncodeHaibTfbsK562Yy1V0416101AlnRep0.bam_VS_wgEncodeHaibTfbsK562RxlchPcr1xAlnRep0.bam.narrowPeak.gz
wgEncodeHaibTfbsK562Yy1V0416102AlnRep0	K562	YY1	24059	spp.idrOptimal.bf.wgEncodeHaibTfbsK562Yy1V0416102AlnRep0.bam_VS_wgEncodeHaibTfbsK562RxlchPcr1xAlnRep0.bam.narrowPeak.gz
wgEncodeSydhTfbsK562Yy1UcdAlnRep0	K562	YY1	4948	spp.idrOptimal.bf.wgEncodeSydhTfbsK562Yy1UcdAlnRep0.bam_VS_wgEncodeSydhTfbsK562InputUcdAlnRep1.bam.narrowPeak.gz
wgEncodeSydhTfbsNt2d1Yy1UcdAlnRep0	NT2-D1	YY1	4862	spp.idrOptimal.bf.wgEncodeSydhTfbsNt2d1Yy1UcdAlnRep0.bam_VS_wgEncodeSydhTfbsNt2d1InputUcdAlnRep1.bam.narrowPeak.gz
wgEncodeHaibTfbsSknshraYy1sc281V0416102AlnRep0	SK-N-SH_RA	YY1	15684	spp.idrOptimal.bf.wgEncodeHaibTfbsSknshraYy1sc281V0416102AlnRep0.bam_VS_wgEncodeHaibTfbsSknshraRxlchV0416102AlnRep1.bam.narrowPeak.gz
wgEncodeHaibTfbsA549Zbtb33V0422111Etoh02AlnRep0	A549	ZBTB33	7152	spp.idrOptimal.bf.wgEncodeHaibTfbsA549Zbtb33V0422111Etoh02AlnRep0.bam_VS_wgEncodeHaibTfbsA549RxlchPcr1xEtoh02AlnRep0.bam.narrowPeak.gz
wgEncodeHaibTfbsGm12878Zbtb33Pcr1xAlnRep0	GM12878	ZBTB33	2144	spp.idrOptimal.bf.wgEncodeHaibTfbsGm12878Zbtb33Pcr1xAlnRep0.bam_VS_wgEncodeHaibTfbsGm12878RxlchPcr1xAlnRep0.bam.narrowPeak.gz
wgEncodeHaibTfbsHct116Zbtb33V0416101AlnRep0	HCT-116	ZBTB33	4325	spp.idrOptimal.bf.wgEncodeHaibTfbsHct116Zbtb33V0416101AlnRep0.bam_VS_wgEncodeHaibTfbsHct116RxlchV0416101AlnRep1.bam.narrowPeak.gz
wgEncodeHaibTfbsHepg2Zbtb33Pcr1xAlnRep0	HepG2	ZBTB33	2879	spp.idrOptimal.bf.wgEncodeHaibTfbsHepg2Zbtb33Pcr1xAlnRep0.bam_VS_wgEncodeHaibTfbsHepg2RxlchPcr1xAlnRep0.bam.narrowPeak.gz
wgEncodeHaibTfbsK562Zbtb33Pcr1xAlnRep0	K562	ZBTB33	3285	spp.idrOptimal.bf.wgEncodeHaibTfbsK562Zbtb33Pcr1xAlnRep0.bam_VS_wgEncodeHaibTfbsK562RxlchPcr1xAlnRep0.bam.narrowPeak.gz
wgEncodeHaibTfbsHepg2Zbtb7aV0416101AlnRep0	HepG2	ZBTB7A	9189	spp.idrOptimal.bf.wgEncodeHaibTfbsHepg2Zbtb7aV0416101AlnRep0.bam_VS_wgEncodeHaibTfbsHepg2RxlchPcr1xAlnRep0.bam.narrowPeak.gz
wgEncodeHaibTfbsK562Zbtb7asc34508V0416101AlnRep0	K562	ZBTB7A	21711	spp.idrOptimal.bf.wgEncodeHaibTfbsK562Zbtb7asc34508V0416101AlnRep0.bam_VS_wgEncodeHaibTfbsK562RxlchPcr1xAlnRep0.bam.narrowPeak.gz
wgEncodeHaibTfbsGm12878Zeb1sc25388V0416102AlnRep0	GM12878	ZEB1	4845	spp.idrOptimal.bf.wgEncodeHaibTfbsGm12878Zeb1sc25388V0416102AlnRep0.bam_VS_wgEncodeHaibTfbsGm12878RxlchPcr1xAlnRep0.bam.narrowPeak.gz
wgEncodeSydhTfbsHelas3Zkscan1hpa006672IggrabAlnRep0	HeLa-S3	ZKSCAN1	4131	spp.idrOptimal.bf.wgEncodeSydhTfbsHelas3Zkscan1hpa006672IggrabAlnRep0.bam_VS_wgEncodeSydhTfbsHelas3InputIggrabAlnRep1.bam.narrowPeak.gz
wgEncodeSydhTfbsGm12878Znf143166181apStdAlnRep0	GM12878	ZNF143	20024	spp.idrOptimal.bf.wgEncodeSydhTfbsGm12878Znf143166181apStdAlnRep0.bam_VS_wgEncodeSydhTfbsGm12878InputStdAlnRep1.bam.narrowPeak.gz
wgEncodeSydhTfbsH1hescZnf143IggrabAlnRep0	H1-hESC	ZNF143	30687	spp.idrOptimal.bf.wgEncodeSydhTfbsH1hescZnf143IggrabAlnRep0.bam_VS_wgEncodeSydhTfbsH1hescInputIggrabAln.bam.narrowPeak.gz
wgEncodeSydhTfbsHelas3Znf143IggrabAlnRep0	HeLa-S3	ZNF143	7048	spp.idrOptimal.bf.wgEncodeSydhTfbsHelas3Znf143IggrabAlnRep0.bam_VS_wgEncodeSydhTfbsHelas3InputIggrabAlnRep1.bam.narrowPeak.gz
wgEncodeSydhTfbsK562Znf143IggrabAlnRep0	K562	ZNF143	29069	spp.idrOptimal.bf.wgEncodeSydhTfbsK562Znf143IggrabAlnRep0.bam_VS_wgEncodeSydhTfbsK562InputIggrabAln.bam.narrowPeak.gz
wgEncodeSydhTfbsMcf7Znf217UcdAlnRep0	MCF-7	ZNF217	9933	spp.idrOptimal.bf.wgEncodeSydhTfbsMcf7Znf217UcdAlnRep0.bam_VS_wgEncodeSydhTfbsMcf7InputUcdAlnRep0.bam.narrowPeak.gz
wgEncodeSydhTfbsHek293tZnf263UcdAlnRep0	HEK293-T-REx	ZNF263	31453	spp.idrOptimal.bf.wgEncodeSydhTfbsHek293tZnf263UcdAlnRep0.bam_VS_wgEncodeSydhTfbsHek293tInputUcdAln.bam.narrowPeak.gz
wgEncodeSydhTfbsK562Znf263UcdAlnRep0	K562	ZNF263	3081	spp.idrOptimal.bf.wgEncodeSydhTfbsK562Znf263UcdAlnRep0.bam_VS_wgEncodeSydhTfbsK562InputUcdAlnRep1.bam.narrowPeak.gz
wgEncodeSydhTfbsGm08714Znf274UcdAlnRep0	GM08714	ZNF274	667	spp.idrOptimal.bf.wgEncodeSydhTfbsGm08714Znf274UcdAlnRep0.bam_VS_wgEncodeSydhTfbsGm08714InputUcdAlnRep1.bam.narrowPeak.gz
wgEncodeSydhTfbsGm12878Znf274StdAlnRep0	GM12878	ZNF274	233	spp.idrOptimal.bf.wgEncodeSydhTfbsGm12878Znf274StdAlnRep0.bam_VS_wgEncodeSydhTfbsGm12878InputStdAlnRep1.bam.narrowPeak.gz
wgEncodeSydhTfbsHelas3Znf274UcdAlnRep0	HeLa-S3	ZNF274	101	spp.idrOptimal.bf.wgEncodeSydhTfbsHelas3Znf274UcdAlnRep0.bam_VS_wgEncodeSydhTfbsHelas3InputUcdAln.bam.narrowPeak.gz
wgEncodeSydhTfbsHepg2Znf274UcdAlnRep0	HepG2	ZNF274	245	spp.idrOptimal.bf.wgEncodeSydhTfbsHepg2Znf274UcdAlnRep0.bam_VS_wgEncodeSydhTfbsHepg2InputUcdAlnRep1.bam.narrowPeak.gz
wgEncodeSydhTfbsK562Znf274UcdAlnRep0	K562	ZNF274	305	spp.idrOptimal.bf.wgEncodeSydhTfbsK562Znf274UcdAlnRep0.bam_VS_wgEncodeSydhTfbsK562InputUcdAlnRep1.bam.narrowPeak.gz
wgEncodeSydhTfbsK562Znf274m01UcdAlnRep0	K562	ZNF274	1997	spp.idrOptimal.bf.wgEncodeSydhTfbsK562Znf274m01UcdAlnRep0.bam_VS_wgEncodeSydhTfbsK562InputUcdAlnRep1.bam.narrowPeak.gz
wgEncodeSydhTfbsNt2d1Znf274UcdAlnRep0	NT2-D1	ZNF274	745	spp.idrOptimal.bf.wgEncodeSydhTfbsNt2d1Znf274UcdAlnRep0.bam_VS_wgEncodeSydhTfbsNt2d1InputUcdAlnRep1.bam.narrowPeak.gz
wgEncodeSydhTfbsGm12878Zzz3StdAlnRep0	GM12878	ZZZ3	713	spp.idrOptimal.bf.wgEncodeSydhTfbsGm12878Zzz3StdAlnRep0.bam_VS_wgEncodeSydhTfbsGm12878InputStdAlnRep1.bam.narrowPeak.gz
wgEncodeSydhTfbsHelas3Zzz3StdAlnRep0	HeLa-S3	ZZZ3	251	spp.idrOptimal.bf.wgEncodeSydhTfbsHelas3Zzz3StdAlnRep0.bam_VS_wgEncodeSydhTfbsHelas3InputStdAlnRep1.bam.narrowPeak.gz

## Sheet: Fly_TF_Replicates
FILENAME	TARGET TF COMMON NAME	STAGE	IDR OPTIMAL PEAKS BLACKLIST FILTERED	PEAK_CALL_FILE
5T-eve-GFP.3401_eve_Embryos-8-16-hr_UofC_stn_Rep1	eve	Embryos-8-16-hr	2493	macs2.idrOptimal.bf.dm3.5T-eve-GFP.3401_eve_Embryos-8-16-hr_UofC_stn_Rep0_VS_3401-Input-R1_q30_Rep0.narrowPeak.gz
5T-eve-GFP.3401_eve_Embryos-8-16-hr_UofC_stn_Rep2	eve	Embryos-8-16-hr	2493	macs2.idrOptimal.bf.dm3.5T-eve-GFP.3401_eve_Embryos-8-16-hr_UofC_stn_Rep0_VS_3401-Input-R1_q30_Rep0.narrowPeak.gz
7T-CAD.2626_Caudal_Embryos-0-4-hr_UofC_stn_Rep1	cad	Embryos-0-4-hr	1535	macs2.idrOptimal.bf.dm3.7T-CAD.2626_Caudal_Embryos-0-4-hr_UofC_stn_Rep0_VS_2626-Input-R1_2626-Input-R2_merged_controls_q30_Rep0.narrowPeak.gz
7T-CAD.2626_Caudal_Embryos-0-4-hr_UofC_stn_Rep2	cad	Embryos-0-4-hr	1535	macs2.idrOptimal.bf.dm3.7T-CAD.2626_Caudal_Embryos-0-4-hr_UofC_stn_Rep0_VS_2626-Input-R1_2626-Input-R2_merged_controls_q30_Rep0.narrowPeak.gz
Hr46-GFP.TCF-nonISO1-0-8_TCF_E0-8_UofC_stn_Rep1	pan	E0-8	535	macs2.idrOptimal.bf.dm3.Hr46-GFP.TCF-nonISO1-0-8_TCF_E0-8_UofC_stn_Rep0_VS_2011-1740_q30_Rep0.narrowPeak.gz
Hr46-GFP.TCF-nonISO1-0-8_TCF_E0-8_UofC_stn_Rep2	pan	E0-8	535	macs2.idrOptimal.bf.dm3.Hr46-GFP.TCF-nonISO1-0-8_TCF_E0-8_UofC_stn_Rep0_VS_2011-1740_q30_Rep0.narrowPeak.gz
Iso1.CG8478-WPP_CG8478_WPP_UofC_stn_Rep1	CG8478	WPP	2089	macs2.idrOptimal.bf.dm3.Iso1.CG8478-WPP_CG8478_WPP_UofC_stn_Rep0_VS_2011-953_q30_Rep0.narrowPeak.gz
Iso1.CG8478-WPP_CG8478_WPP_UofC_stn_Rep2	CG8478	WPP	2089	macs2.idrOptimal.bf.dm3.Iso1.CG8478-WPP_CG8478_WPP_UofC_stn_Rep0_VS_2011-953_q30_Rep0.narrowPeak.gz
Iso1.CNC-AdultFemale_CNC_AdultFemale_UofC_stn_Rep1	cnc	AdultFemale	491	macs2.idrOptimal.bf.dm3.Iso1.CNC-AdultFemale_CNC_AdultFemale_UofC_stn_Rep0_VS_2011-1017_q30_Rep0.narrowPeak.gz
Iso1.CNC-AdultFemale_CNC_AdultFemale_UofC_stn_Rep2	cnc	AdultFemale	491	macs2.idrOptimal.bf.dm3.Iso1.CNC-AdultFemale_CNC_AdultFemale_UofC_stn_Rep0_VS_2011-1017_q30_Rep0.narrowPeak.gz
Iso1.CNC-AdultMale_CNC_AdultMale_UofC_stn_Rep1	cnc	AdultMale	2854	macs2.idrOptimal.bf.dm3.Iso1.CNC-AdultMale_CNC_AdultMale_UofC_stn_Rep0_VS_2011-1018_q30_Rep0.narrowPeak.gz
Iso1.CNC-AdultMale_CNC_AdultMale_UofC_stn_Rep2	cnc	AdultMale	2854	macs2.idrOptimal.bf.dm3.Iso1.CNC-AdultMale_CNC_AdultMale_UofC_stn_Rep0_VS_2011-1018_q30_Rep0.narrowPeak.gz
Iso1.Fru-0-8_Fru_E0-8_UofC_stn_Rep1	fru	E0-8	322	macs2.idrOptimal.bf.dm3.Iso1.Fru-0-8_Fru_E0-8_UofC_stn_Rep0_VS_2011-1226_q30_Rep0.narrowPeak.gz
Iso1.Fru-0-8_Fru_E0-8_UofC_stn_Rep2	fru	E0-8	322	macs2.idrOptimal.bf.dm3.Iso1.Fru-0-8_Fru_E0-8_UofC_stn_Rep0_VS_2011-1226_q30_Rep0.narrowPeak.gz
Iso1.Gro-WPP_Gro_WPP_UofC_stn_Rep1	gro	WPP	3500	macs2.idrOptimal.bf.dm3.Iso1.Gro-WPP_Gro_WPP_UofC_stn_Rep0_VS_2011-1819_q30_Rep0.narrowPeak.gz
Iso1.Gro-WPP_Gro_WPP_UofC_stn_Rep2	gro	WPP	3500	macs2.idrOptimal.bf.dm3.Iso1.Gro-WPP_Gro_WPP_UofC_stn_Rep0_VS_2011-1819_q30_Rep0.narrowPeak.gz
Iso1.HP1-8-16_HP1_E8-16_UofC_stn_Rep1	HP1b	E8-16	3600	macs2.idrOptimal.bf.dm3.Iso1.HP1-8-16_HP1_E8-16_UofC_stn_Rep0_VS_2011-598_q30_Rep0.narrowPeak.gz
Iso1.HP1-8-16_HP1_E8-16_UofC_stn_Rep2	HP1b	E8-16	3600	macs2.idrOptimal.bf.dm3.Iso1.HP1-8-16_HP1_E8-16_UofC_stn_Rep0_VS_2011-598_q30_Rep0.narrowPeak.gz
Iso1.Hth-0-8_Hth_E0-8_UofC_stn_Rep1	hth	E0-8	2287	macs2.idrOptimal.bf.dm3.Iso1.Hth-0-8_Hth_E0-8_UofC_stn_Rep0_VS_2011-653_q30_Rep0.narrowPeak.gz
Iso1.Hth-0-8_Hth_E0-8_UofC_stn_Rep2	hth	E0-8	2287	macs2.idrOptimal.bf.dm3.Iso1.Hth-0-8_Hth_E0-8_UofC_stn_Rep0_VS_2011-653_q30_Rep0.narrowPeak.gz
Iso1.Hth-8-16_Hth_E8-16_UofC_stn_Rep1	hth	E8-16	1618	macs2.idrOptimal.bf.dm3.Iso1.Hth-8-16_Hth_E8-16_UofC_stn_Rep0_VS_2011-1101_q30_Rep0.narrowPeak.gz
Iso1.Hth-8-16_Hth_E8-16_UofC_stn_Rep2	hth	E8-16	1618	macs2.idrOptimal.bf.dm3.Iso1.Hth-8-16_Hth_E8-16_UofC_stn_Rep0_VS_2011-1101_q30_Rep0.narrowPeak.gz
Iso1.Myc-W3L_Myc_W3L_UofC_stn_Rep1	dm	W3L	4442	macs2.idrOptimal.bf.dm3.Iso1.Myc-W3L_Myc_W3L_UofC_stn_Rep0_VS_2011-2123_q30_Rep0.narrowPeak.gz
Iso1.Myc-W3L_Myc_W3L_UofC_stn_Rep2	dm	W3L	4442	macs2.idrOptimal.bf.dm3.Iso1.Myc-W3L_Myc_W3L_UofC_stn_Rep0_VS_2011-2123_q30_Rep0.narrowPeak.gz
Iso1.SuHw-16-24_SuHw_E16-24_UofC_stn_Rep1	su(Hw)	E16-24	3766	macs2.idrOptimal.bf.dm3.Iso1.SuHw-16-24_SuHw_E16-24_UofC_stn_Rep0_VS_2011-961_q30_Rep0.narrowPeak.gz
Iso1.SuHw-16-24_SuHw_E16-24_UofC_stn_Rep2	su(Hw)	E16-24	3766	macs2.idrOptimal.bf.dm3.Iso1.SuHw-16-24_SuHw_E16-24_UofC_stn_Rep0_VS_2011-961_q30_Rep0.narrowPeak.gz
Iso1.SuHw-WPP_SuHw_WPP_UofC_stn_Rep1	su(Hw)	WPP	5346	macs2.idrOptimal.bf.dm3.Iso1.SuHw-WPP_SuHw_WPP_UofC_stn_Rep0_VS_2011-953_q30_Rep0.narrowPeak.gz
Iso1.SuHw-WPP_SuHw_WPP_UofC_stn_Rep2	su(Hw)	WPP	5346	macs2.idrOptimal.bf.dm3.Iso1.SuHw-WPP_SuHw_WPP_UofC_stn_Rep0_VS_2011-953_q30_Rep0.narrowPeak.gz
Iso1.TCF-16-24_TCF_E16-24_UofC_stn_Rep1	pan	E16-24	384	macs2.idrOptimal.bf.dm3.Iso1.TCF-16-24_TCF_E16-24_UofC_stn_Rep0_VS_2011-1019_q30_Rep0.narrowPeak.gz
Iso1.TCF-16-24_TCF_E16-24_UofC_stn_Rep2	pan	E16-24	384	macs2.idrOptimal.bf.dm3.Iso1.TCF-16-24_TCF_E16-24_UofC_stn_Rep0_VS_2011-1019_q30_Rep0.narrowPeak.gz
Iso1.TCF-W3L_TCF_W3L_UofC_stn_Rep1	pan	W3L	532	macs2.idrOptimal.bf.dm3.Iso1.TCF-W3L_TCF_W3L_UofC_stn_Rep0_VS_2011-1770_q30_Rep0.narrowPeak.gz
Iso1.TCF-W3L_TCF_W3L_UofC_stn_Rep2	pan	W3L	532	macs2.idrOptimal.bf.dm3.Iso1.TCF-W3L_TCF_W3L_UofC_stn_Rep0_VS_2011-1770_q30_Rep0.narrowPeak.gz
Iso1.TCF-W3L_TCF_W3L_UofC_stn_Rep3	pan	W3L	532	macs2.idrOptimal.bf.dm3.Iso1.TCF-W3L_TCF_W3L_UofC_stn_Rep0_VS_2011-1770_q30_Rep0.narrowPeak.gz
Iso1.TCF-WPP_TCF_WPP_UofC_stn_Rep1	pan	WPP	888	macs2.idrOptimal.bf.dm3.Iso1.TCF-WPP_TCF_WPP_UofC_stn_Rep0_VS_2011-1756_q30_Rep0.narrowPeak.gz
Iso1.TCF-WPP_TCF_WPP_UofC_stn_Rep2	pan	WPP	888	macs2.idrOptimal.bf.dm3.Iso1.TCF-WPP_TCF_WPP_UofC_stn_Rep0_VS_2011-1756_q30_Rep0.narrowPeak.gz
Iso1.TCF-WPP_TCF_WPP_UofC_stn_Rep3	pan	WPP	888	macs2.idrOptimal.bf.dm3.Iso1.TCF-WPP_TCF_WPP_UofC_stn_Rep0_VS_2011-1756_q30_Rep0.narrowPeak.gz
Iso1.Trl-8-16_Trl_E8-16_UofC_stn_Rep1	Trl	E8-16	6329	macs2.idrOptimal.bf.dm3.Iso1.Trl-8-16_Trl_E8-16_UofC_stn_Rep0_VS_2012-177_2012-178_merged_controls_q30_Rep0.narrowPeak.gz
Iso1.Trl-8-16_Trl_E8-16_UofC_stn_Rep2	Trl	E8-16	6329	macs2.idrOptimal.bf.dm3.Iso1.Trl-8-16_Trl_E8-16_UofC_stn_Rep0_VS_2012-177_2012-178_merged_controls_q30_Rep0.narrowPeak.gz
Iso1.Trl-8-16_Trl_E8-16_UofC_stn_Rep3	Trl	E8-16	6329	macs2.idrOptimal.bf.dm3.Iso1.Trl-8-16_Trl_E8-16_UofC_stn_Rep0_VS_2012-177_2012-178_merged_controls_q30_Rep0.narrowPeak.gz
Iso1.Yki-8-16_Yki_E8-16_UofC_stn_Rep1	yki	E8-16	1964	macs2.idrOptimal.bf.dm3.Iso1.Yki-8-16_Yki_E8-16_UofC_stn_Rep0_VS_2012-177_2012-178_merged_controls_q30_Rep0.narrowPeak.gz
Iso1.Yki-8-16_Yki_E8-16_UofC_stn_Rep2	yki	E8-16	1964	macs2.idrOptimal.bf.dm3.Iso1.Yki-8-16_Yki_E8-16_UofC_stn_Rep0_VS_2012-177_2012-178_merged_controls_q30_Rep0.narrowPeak.gz
Iso1.Yki-8-16_Yki_E8-16_UofC_stn_Rep3	yki	E8-16	1964	macs2.idrOptimal.bf.dm3.Iso1.Yki-8-16_Yki_E8-16_UofC_stn_Rep0_VS_2012-177_2012-178_merged_controls_q30_Rep0.narrowPeak.gz
Notch-GFP.Notch-GFP-W3L_Notch_W3L_UofC_stn_Rep1	N	W3L	2496	macs2.idrOptimal.bf.dm3.Notch-GFP.Notch-GFP-W3L_Notch_W3L_UofC_stn_Rep0_VS_2011-2217_q30_Rep0.narrowPeak.gz
Notch-GFP.Notch-GFP-W3L_Notch_W3L_UofC_stn_Rep2	N	W3L	2496	macs2.idrOptimal.bf.dm3.Notch-GFP.Notch-GFP-W3L_Notch_W3L_UofC_stn_Rep0_VS_2011-2217_q30_Rep0.narrowPeak.gz
S2-DRSC.2638_CTCF_Late-Embryonic-stage_UofC_stn_Rep1	CTCF	Late-Embryonic-stage	2926	macs2.idrOptimal.bf.dm3.S2-DRSC.2638_CTCF_Late-Embryonic-stage_UofC_stn_Rep0_VS_2638-Input-R1_q30_Rep0.narrowPeak.gz
S2-DRSC.2638_CTCF_Late-Embryonic-stage_UofC_stn_Rep2	CTCF	Late-Embryonic-stage	2926	macs2.idrOptimal.bf.dm3.S2-DRSC.2638_CTCF_Late-Embryonic-stage_UofC_stn_Rep0_VS_2638-Input-R1_q30_Rep0.narrowPeak.gz
S2-DRSC.2639_CTCF_Late-Embryonic-stage_UofC_stn_Rep1	CTCF	Late-Embryonic-stage	2441	macs2.idrOptimal.bf.dm3.S2-DRSC.2639_CTCF_Late-Embryonic-stage_UofC_stn_Rep0_VS_2639-Input-R1_q30_Rep0.narrowPeak.gz
S2-DRSC.2639_CTCF_Late-Embryonic-stage_UofC_stn_Rep2	CTCF	Late-Embryonic-stage	2441	macs2.idrOptimal.bf.dm3.S2-DRSC.2639_CTCF_Late-Embryonic-stage_UofC_stn_Rep0_VS_2639-Input-R1_q30_Rep0.narrowPeak.gz
S2.CG8478-S2_CG8478_S2_UofC_stn_Rep1	CG8478	S2	1335	macs2.idrOptimal.bf.dm3.S2.CG8478-S2_CG8478_S2_UofC_stn_Rep0_VS_2012-90_q30_Rep0.narrowPeak.gz
S2.CG8478-S2_CG8478_S2_UofC_stn_Rep2	CG8478	S2	1335	macs2.idrOptimal.bf.dm3.S2.CG8478-S2_CG8478_S2_UofC_stn_Rep0_VS_2012-90_q30_Rep0.narrowPeak.gz
strain.3232_Sin3A_Embryos-0-12-hr_UofC_stn_Rep1	Sin3A	Embryos-0-12-hr	2991	macs2.idrOptimal.bf.dm3.strain.3232_Sin3A_Embryos-0-12-hr_UofC_stn_Rep0_VS_3232-Input-R1_q30_Rep0.narrowPeak.gz
strain.3232_Sin3A_Embryos-0-12-hr_UofC_stn_Rep2	Sin3A	Embryos-0-12-hr	2991	macs2.idrOptimal.bf.dm3.strain.3232_Sin3A_Embryos-0-12-hr_UofC_stn_Rep0_VS_3232-Input-R1_q30_Rep0.narrowPeak.gz
strain.3234_tll_Embryos-0-4-hr_UofC_stn_Rep1	tll	Embryos-0-4-hr	1147	macs2.idrOptimal.bf.dm3.strain.3234_tll_Embryos-0-4-hr_UofC_stn_Rep0_VS_3234-Input-R1_3234-Input-R2_merged_controls_q30_Rep0.narrowPeak.gz
strain.3234_tll_Embryos-0-4-hr_UofC_stn_Rep2	tll	Embryos-0-4-hr	1147	macs2.idrOptimal.bf.dm3.strain.3234_tll_Embryos-0-4-hr_UofC_stn_Rep0_VS_3234-Input-R1_3234-Input-R2_merged_controls_q30_Rep0.narrowPeak.gz
strain.3238_GAF_Embryos-16-24-hr_UofC_stn_Rep1	Trl	Embryos-16-24-hr	6020	macs2.idrOptimal.bf.dm3.strain.3238_GAF_Embryos-16-24-hr_UofC_stn_Rep0_VS_3238-Input-R1_q30_Rep0.narrowPeak.gz
strain.3238_GAF_Embryos-16-24-hr_UofC_stn_Rep2	Trl	Embryos-16-24-hr	6020	macs2.idrOptimal.bf.dm3.strain.3238_GAF_Embryos-16-24-hr_UofC_stn_Rep0_VS_3238-Input-R1_q30_Rep0.narrowPeak.gz
strain.3240_CG8478_Embryos-8-16-hr_UofC_stn_Rep1	CG8478	Embryos-8-16-hr	1264	macs2.idrOptimal.bf.dm3.strain.3240_CG8478_Embryos-8-16-hr_UofC_stn_Rep0_VS_3240-Input-R1_q30_Rep0.narrowPeak.gz
strain.3240_CG8478_Embryos-8-16-hr_UofC_stn_Rep2	CG8478	Embryos-8-16-hr	1264	macs2.idrOptimal.bf.dm3.strain.3240_CG8478_Embryos-8-16-hr_UofC_stn_Rep0_VS_3240-Input-R1_q30_Rep0.narrowPeak.gz
strain.3242_Huckebein_Embryos-8-16-hr_UofC_stn_Rep1	hkb	Embryos-8-16-hr	195	macs2.idrOptimal.bf.dm3.strain.3242_Huckebein_Embryos-8-16-hr_UofC_stn_Rep0_VS_3242-Input-R1_q30_Rep0.narrowPeak.gz
strain.3242_Huckebein_Embryos-8-16-hr_UofC_stn_Rep2	hkb	Embryos-8-16-hr	195	macs2.idrOptimal.bf.dm3.strain.3242_Huckebein_Embryos-8-16-hr_UofC_stn_Rep0_VS_3242-Input-R1_q30_Rep0.narrowPeak.gz
strain.3243_KNI_Embryos-8-16-hr_UofC_stn_Rep1	kni	Embryos-8-16-hr	803	macs2.idrOptimal.bf.dm3.strain.3243_KNI_Embryos-8-16-hr_UofC_stn_Rep0_VS_3243-Input-R1_3243-Input-R2_3243-Input-R3_merged_controls_q30_Rep0.narrowPeak.gz
strain.3243_KNI_Embryos-8-16-hr_UofC_stn_Rep2	kni	Embryos-8-16-hr	803	macs2.idrOptimal.bf.dm3.strain.3243_KNI_Embryos-8-16-hr_UofC_stn_Rep0_VS_3243-Input-R1_3243-Input-R2_3243-Input-R3_merged_controls_q30_Rep0.narrowPeak.gz
strain.3243_KNI_Embryos-8-16-hr_UofC_stn_Rep3	kni	Embryos-8-16-hr	803	macs2.idrOptimal.bf.dm3.strain.3243_KNI_Embryos-8-16-hr_UofC_stn_Rep0_VS_3243-Input-R1_3243-Input-R2_3243-Input-R3_merged_controls_q30_Rep0.narrowPeak.gz
strain.3390_Hr39_Embryos-16-24-hr_UofC_stn_Rep1	Hr39	Embryos-16-24-hr	1247	macs2.idrOptimal.bf.dm3.strain.3390_Hr39_Embryos-16-24-hr_UofC_stn_Rep0_VS_3390-Input-R1_q30_Rep0.narrowPeak.gz
strain.3390_Hr39_Embryos-16-24-hr_UofC_stn_Rep2	Hr39	Embryos-16-24-hr	1247	macs2.idrOptimal.bf.dm3.strain.3390_Hr39_Embryos-16-24-hr_UofC_stn_Rep0_VS_3390-Input-R1_q30_Rep0.narrowPeak.gz
strain.3391_HP1_Embryos-16-24-hr_UofC_stn_Rep1	HP1b	Embryos-16-24-hr	2369	macs2.idrOptimal.bf.dm3.strain.3391_HP1_Embryos-16-24-hr_UofC_stn_Rep0_VS_3391-Input-R1_q30_Rep0.narrowPeak.gz
strain.3391_HP1_Embryos-16-24-hr_UofC_stn_Rep2	HP1b	Embryos-16-24-hr	2369	macs2.idrOptimal.bf.dm3.strain.3391_HP1_Embryos-16-24-hr_UofC_stn_Rep0_VS_3391-Input-R1_q30_Rep0.narrowPeak.gz
strain.3392_HP1_Embryos-16-24-hr_UofC_stn_Rep1	HP1b	Embryos-16-24-hr	2068	macs2.idrOptimal.bf.dm3.strain.3392_HP1_Embryos-16-24-hr_UofC_stn_Rep0_VS_3392-Input-R1_q30_Rep0.narrowPeak.gz
strain.3392_HP1_Embryos-16-24-hr_UofC_stn_Rep2	HP1b	Embryos-16-24-hr	2068	macs2.idrOptimal.bf.dm3.strain.3392_HP1_Embryos-16-24-hr_UofC_stn_Rep0_VS_3392-Input-R1_q30_Rep0.narrowPeak.gz
strain.3393_bonus_Embryos-16-24-hr_UofC_stn_Rep1	bon	Embryos-16-24-hr	904	macs2.idrOptimal.bf.dm3.strain.3393_bonus_Embryos-16-24-hr_UofC_stn_Rep0_VS_3393-Input-R1_q30_Rep0.narrowPeak.gz
strain.3393_bonus_Embryos-16-24-hr_UofC_stn_Rep2	bon	Embryos-16-24-hr	904	macs2.idrOptimal.bf.dm3.strain.3393_bonus_Embryos-16-24-hr_UofC_stn_Rep0_VS_3393-Input-R1_q30_Rep0.narrowPeak.gz
strain.3394_Kruppel_Embryos-16-24-hr_UofC_stn_Rep1	Kr	Embryos-16-24-hr	472	macs2.idrOptimal.bf.dm3.strain.3394_Kruppel_Embryos-16-24-hr_UofC_stn_Rep0_VS_3394-Input-R1_3394-Input-R2_merged_controls_q30_Rep0.narrowPeak.gz
strain.3394_Kruppel_Embryos-16-24-hr_UofC_stn_Rep2	Kr	Embryos-16-24-hr	472	macs2.idrOptimal.bf.dm3.strain.3394_Kruppel_Embryos-16-24-hr_UofC_stn_Rep0_VS_3394-Input-R1_3394-Input-R2_merged_controls_q30_Rep0.narrowPeak.gz
strain.3395_Dichaete_Embryos-0-8-hr_UofC_stn_Rep1	D	Embryos-0-8-hr	357	macs2.idrOptimal.bf.dm3.strain.3395_Dichaete_Embryos-0-8-hr_UofC_stn_Rep0_VS_3395-Input-R1_q30_Rep0.narrowPeak.gz
strain.3395_Dichaete_Embryos-0-8-hr_UofC_stn_Rep2	D	Embryos-0-8-hr	357	macs2.idrOptimal.bf.dm3.strain.3395_Dichaete_Embryos-0-8-hr_UofC_stn_Rep0_VS_3395-Input-R1_q30_Rep0.narrowPeak.gz
strain.3396_SuVar3-9_Embryos-0-12-hr_UofC_stn_Rep1	Su(var)3-9	Embryos-0-12-hr	3082	macs2.idrOptimal.bf.dm3.strain.3396_SuVar3-9_Embryos-0-12-hr_UofC_stn_Rep0_VS_3396-Input-R1_q30_Rep0.narrowPeak.gz
strain.3396_SuVar3-9_Embryos-0-12-hr_UofC_stn_Rep2	Su(var)3-9	Embryos-0-12-hr	3082	macs2.idrOptimal.bf.dm3.strain.3396_SuVar3-9_Embryos-0-12-hr_UofC_stn_Rep0_VS_3396-Input-R1_q30_Rep0.narrowPeak.gz
strain.3399_trem_Adult-Female_UofC_stn_Rep1	trem	Adult-Female	1273	macs2.idrOptimal.bf.dm3.strain.3399_trem_Adult-Female_UofC_stn_Rep0_VS_3399-Input-R1_q30_Rep0.narrowPeak.gz
strain.3399_trem_Adult-Female_UofC_stn_Rep2	trem	Adult-Female	1273	macs2.idrOptimal.bf.dm3.strain.3399_trem_Adult-Female_UofC_stn_Rep0_VS_3399-Input-R1_q30_Rep0.narrowPeak.gz
Y-cn-bw-sp.2627_HDAC4a_Embryos-0-12-hr_UofC_stn_Rep1	HDAC4a	Embryos-0-12-hr	1801	macs2.idrOptimal.bf.dm3.Y-cn-bw-sp.2627_HDAC4a_Embryos-0-12-hr_UofC_stn_Rep0_VS_2627-Input-R1_q30_Rep0.narrowPeak.gz
Y-cn-bw-sp.2627_HDAC4a_Embryos-0-12-hr_UofC_stn_Rep2	HDAC4a	Embryos-0-12-hr	1801	macs2.idrOptimal.bf.dm3.Y-cn-bw-sp.2627_HDAC4a_Embryos-0-12-hr_UofC_stn_Rep0_VS_2627-Input-R1_q30_Rep0.narrowPeak.gz
Y-cn-bw-sp.2629_HDAC11_Embryos-0-12-hr_UofC_stn_Rep1	HDAC11	Embryos-0-12-hr	2038	macs2.idrOptimal.bf.dm3.Y-cn-bw-sp.2629_HDAC11_Embryos-0-12-hr_UofC_stn_Rep0_VS_2629-Input-R1_q30_Rep0.narrowPeak.gz
Y-cn-bw-sp.2629_HDAC11_Embryos-0-12-hr_UofC_stn_Rep2	HDAC11	Embryos-0-12-hr	2038	macs2.idrOptimal.bf.dm3.Y-cn-bw-sp.2629_HDAC11_Embryos-0-12-hr_UofC_stn_Rep0_VS_2629-Input-R1_q30_Rep0.narrowPeak.gz
Y-cn-bw-sp.2630_HDAC11_Embryos-0-12-hr_UofC_stn_Rep1	HDAC11	Embryos-0-12-hr	978	macs2.idrOptimal.bf.dm3.Y-cn-bw-sp.2630_HDAC11_Embryos-0-12-hr_UofC_stn_Rep0_VS_2630-Input-R1_q30_Rep0.narrowPeak.gz
Y-cn-bw-sp.2630_HDAC11_Embryos-0-12-hr_UofC_stn_Rep2	HDAC11	Embryos-0-12-hr	978	macs2.idrOptimal.bf.dm3.Y-cn-bw-sp.2630_HDAC11_Embryos-0-12-hr_UofC_stn_Rep0_VS_2630-Input-R1_q30_Rep0.narrowPeak.gz
Y-cn-bw-sp.2633_HDAC3_Embryos-0-12-hr_UofC_stn_Rep1	HDAC3	Embryos-0-12-hr	5971	macs2.idrOptimal.bf.dm3.Y-cn-bw-sp.2633_HDAC3_Embryos-0-12-hr_UofC_stn_Rep0_VS_2633-Input-R1_q30_Rep0.narrowPeak.gz
Y-cn-bw-sp.2633_HDAC3_Embryos-0-12-hr_UofC_stn_Rep2	HDAC3	Embryos-0-12-hr	5971	macs2.idrOptimal.bf.dm3.Y-cn-bw-sp.2633_HDAC3_Embryos-0-12-hr_UofC_stn_Rep0_VS_2633-Input-R1_q30_Rep0.narrowPeak.gz
Y-cn-bw-sp.2634_HDAC3_Embryos-0-12-hr_UofC_stn_Rep1	HDAC3	Embryos-0-12-hr	6550	macs2.idrOptimal.bf.dm3.Y-cn-bw-sp.2634_HDAC3_Embryos-0-12-hr_UofC_stn_Rep0_VS_2634-Input-R1_q30_Rep0.narrowPeak.gz
Y-cn-bw-sp.2634_HDAC3_Embryos-0-12-hr_UofC_stn_Rep2	HDAC3	Embryos-0-12-hr	6550	macs2.idrOptimal.bf.dm3.Y-cn-bw-sp.2634_HDAC3_Embryos-0-12-hr_UofC_stn_Rep0_VS_2634-Input-R1_q30_Rep0.narrowPeak.gz
Y-cn-bw-sp.2636_HDAC1_Embryos-0-12-hr_UofC_stn_Rep1	HDAC1	Embryos-0-12-hr	4388	macs2.idrOptimal.bf.dm3.Y-cn-bw-sp.2636_HDAC1_Embryos-0-12-hr_UofC_stn_Rep0_VS_2636-Input-R1_q30_Rep0.narrowPeak.gz
Y-cn-bw-sp.2636_HDAC1_Embryos-0-12-hr_UofC_stn_Rep2	HDAC1	Embryos-0-12-hr	4388	macs2.idrOptimal.bf.dm3.Y-cn-bw-sp.2636_HDAC1_Embryos-0-12-hr_UofC_stn_Rep0_VS_2636-Input-R1_q30_Rep0.narrowPeak.gz
10T-DFD-GFP.3229_dfd_Embryos-16-24-hr_UofC_stn_Rep1	Dfd	Embryos-16-24-hr	399	macs2.idrOptimal.bf.dm3.10T-DFD-GFP.3229_dfd_Embryos-16-24-hr_UofC_stn_Rep0_VS_3229-Input-R1_q30_Rep0.narrowPeak.gz
10T-DFD-GFP.3229_dfd_Embryos-16-24-hr_UofC_stn_Rep2	Dfd	Embryos-16-24-hr	399	macs2.idrOptimal.bf.dm3.10T-DFD-GFP.3229_dfd_Embryos-16-24-hr_UofC_stn_Rep0_VS_3229-Input-R1_q30_Rep0.narrowPeak.gz
10T-DFD-GFP.3230_dfd_Larvae-L3-stage_UofC_stn_Rep1	Dfd	Larvae-L3-stage	643	macs2.idrOptimal.bf.dm3.10T-DFD-GFP.3230_dfd_Larvae-L3-stage_UofC_stn_Rep0_VS_3230-Input-R1_3230-Input-R2_merged_controls_q30_Rep0.narrowPeak.gz
10T-DFD-GFP.3230_dfd_Larvae-L3-stage_UofC_stn_Rep2	Dfd	Larvae-L3-stage	643	macs2.idrOptimal.bf.dm3.10T-DFD-GFP.3230_dfd_Larvae-L3-stage_UofC_stn_Rep0_VS_3230-Input-R1_3230-Input-R2_merged_controls_q30_Rep0.narrowPeak.gz
7T-CAD.3403_Caudal_Larvae-L3-stage_UofC_stn_Rep1	cad	Larvae-L3-stage	587	macs2.idrOptimal.bf.dm3.7T-CAD.3403_Caudal_Larvae-L3-stage_UofC_stn_Rep0_VS_3403-Input-R1_3403-Input-R2_3403-Input-R3_merged_controls_q30_Rep0.narrowPeak.gz
7T-CAD.3403_Caudal_Larvae-L3-stage_UofC_stn_Rep2	cad	Larvae-L3-stage	587	macs2.idrOptimal.bf.dm3.7T-CAD.3403_Caudal_Larvae-L3-stage_UofC_stn_Rep0_VS_3403-Input-R1_3403-Input-R2_3403-Input-R3_merged_controls_q30_Rep0.narrowPeak.gz
7T-CAD.3403_Caudal_Larvae-L3-stage_UofC_stn_Rep3	cad	Larvae-L3-stage	587	macs2.idrOptimal.bf.dm3.7T-CAD.3403_Caudal_Larvae-L3-stage_UofC_stn_Rep0_VS_3403-Input-R1_3403-Input-R2_3403-Input-R3_merged_controls_q30_Rep0.narrowPeak.gz
AbdB-GFP.AbdB-GFP-W3L_AbdB_W3L_UofC_stn_Rep1	Abd-B	W3L	722	macs2.idrOptimal.bf.dm3.AbdB-GFP.AbdB-GFP-W3L_AbdB_W3L_UofC_stn_Rep0_VS_2011-2133_q30_Rep0.narrowPeak.gz
AbdB-GFP.AbdB-GFP-W3L_AbdB_W3L_UofC_stn_Rep2	Abd-B	W3L	722	macs2.idrOptimal.bf.dm3.AbdB-GFP.AbdB-GFP-W3L_AbdB_W3L_UofC_stn_Rep0_VS_2011-2133_q30_Rep0.narrowPeak.gz
Dfd-GFP.Dfd-GFP-0-8_Dfd_E0-8_UofC_stn_Rep1	Dfd	E0-8	926	macs2.idrOptimal.bf.dm3.Dfd-GFP.Dfd-GFP-0-8_Dfd_E0-8_UofC_stn_Rep0_VS_2011-1717_q30_Rep0.narrowPeak.gz
Dfd-GFP.Dfd-GFP-0-8_Dfd_E0-8_UofC_stn_Rep2	Dfd	E0-8	926	macs2.idrOptimal.bf.dm3.Dfd-GFP.Dfd-GFP-0-8_Dfd_E0-8_UofC_stn_Rep0_VS_2011-1717_q30_Rep0.narrowPeak.gz
EcR-GFP.2641_EcR_pupae-WPP-10-11-hr_UofC_stn_Rep1	EcR	pupae-WPP-10-11-hr	648	macs2.idrOptimal.bf.dm3.EcR-GFP.2641_EcR_pupae-WPP-10-11-hr_UofC_stn_Rep0_VS_2641-Input-R1_2641-Input-R2_2641-Input-R3_merged_controls_q30_Rep0.narrowPeak.gz
EcR-GFP.2641_EcR_pupae-WPP-10-11-hr_UofC_stn_Rep2	EcR	pupae-WPP-10-11-hr	648	macs2.idrOptimal.bf.dm3.EcR-GFP.2641_EcR_pupae-WPP-10-11-hr_UofC_stn_Rep0_VS_2641-Input-R1_2641-Input-R2_2641-Input-R3_merged_controls_q30_Rep0.narrowPeak.gz
EcR-GFP.2641_EcR_pupae-WPP-10-11-hr_UofC_stn_Rep3	EcR	pupae-WPP-10-11-hr	648	macs2.idrOptimal.bf.dm3.EcR-GFP.2641_EcR_pupae-WPP-10-11-hr_UofC_stn_Rep0_VS_2641-Input-R1_2641-Input-R2_2641-Input-R3_merged_controls_q30_Rep0.narrowPeak.gz
EcR-GFP.2642_EcR_WPP-30-33-hr_UofC_stn_Rep1	EcR	WPP-30-33-hr	1088	macs2.idrOptimal.bf.dm3.EcR-GFP.2642_EcR_WPP-30-33-hr_UofC_stn_Rep0_VS_2642-Input-R1_2642-Input-R2_merged_controls_q30_Rep0.narrowPeak.gz
EcR-GFP.2642_EcR_WPP-30-33-hr_UofC_stn_Rep2	EcR	WPP-30-33-hr	1088	macs2.idrOptimal.bf.dm3.EcR-GFP.2642_EcR_WPP-30-33-hr_UofC_stn_Rep0_VS_2642-Input-R1_2642-Input-R2_merged_controls_q30_Rep0.narrowPeak.gz
EcR-GFP.2642_EcR_WPP-30-33-hr_UofC_stn_Rep3	EcR	WPP-30-33-hr	1088	macs2.idrOptimal.bf.dm3.EcR-GFP.2642_EcR_WPP-30-33-hr_UofC_stn_Rep0_VS_2642-Input-R1_2642-Input-R2_merged_controls_q30_Rep0.narrowPeak.gz
Eip74-GFP.Eip74-GFP-8-16_Eip74_E8-16_UofC_stn_Rep1	Eip74EF	E8-16	741	macs2.idrOptimal.bf.dm3.Eip74-GFP.Eip74-GFP-8-16_Eip74_E8-16_UofC_stn_Rep0_VS_2011-2417_q30_Rep0.narrowPeak.gz
Eip74-GFP.Eip74-GFP-8-16_Eip74_E8-16_UofC_stn_Rep2	Eip74EF	E8-16	741	macs2.idrOptimal.bf.dm3.Eip74-GFP.Eip74-GFP-8-16_Eip74_E8-16_UofC_stn_Rep0_VS_2011-2417_q30_Rep0.narrowPeak.gz
Exd-GFP.Cmi-0-8_Cmi_E0-8_UofC_stn_Rep1	Lpt	E0-8	1673	macs2.idrOptimal.bf.dm3.Exd-GFP.Cmi-0-8_Cmi_E0-8_UofC_stn_Rep0_VS_2011-2131_q30_Rep0.narrowPeak.gz
Exd-GFP.Cmi-0-8_Cmi_E0-8_UofC_stn_Rep2	Lpt	E0-8	1673	macs2.idrOptimal.bf.dm3.Exd-GFP.Cmi-0-8_Cmi_E0-8_UofC_stn_Rep0_VS_2011-2131_q30_Rep0.narrowPeak.gz
Hr78-GFP.Hr78-GFP-8-16_Hr78_E8-16_UofC_stn_Rep1	Hr78	E8-16	713	macs2.idrOptimal.bf.dm3.Hr78-GFP.Hr78-GFP-8-16_Hr78_E8-16_UofC_stn_Rep0_VS_2011-2427_q30_Rep0.narrowPeak.gz
Hr78-GFP.Hr78-GFP-8-16_Hr78_E8-16_UofC_stn_Rep2	Hr78	E8-16	713	macs2.idrOptimal.bf.dm3.Hr78-GFP.Hr78-GFP-8-16_Hr78_E8-16_UofC_stn_Rep0_VS_2011-2427_q30_Rep0.narrowPeak.gz
Hr78-GFP.Hr78-GFP-W3L_Hr78_W3L_UofC_stn_Rep1	Hr78	W3L	1269	macs2.idrOptimal.bf.dm3.Hr78-GFP.Hr78-GFP-W3L_Hr78_W3L_UofC_stn_Rep0_VS_2011-2431_q30_Rep0.narrowPeak.gz
Hr78-GFP.Hr78-GFP-W3L_Hr78_W3L_UofC_stn_Rep2	Hr78	W3L	1269	macs2.idrOptimal.bf.dm3.Hr78-GFP.Hr78-GFP-W3L_Hr78_W3L_UofC_stn_Rep0_VS_2011-2431_q30_Rep0.narrowPeak.gz
Iso1.br-core-0-8_br-core_E0-8_UofC_stn_Rep1	br	E0-8	378	macs2.idrOptimal.bf.dm3.Iso1.br-core-0-8_br-core_E0-8_UofC_stn_Rep0_VS_2011-1104_q30_Rep0.narrowPeak.gz
Iso1.br-core-0-8_br-core_E0-8_UofC_stn_Rep2	br	E0-8	378	macs2.idrOptimal.bf.dm3.Iso1.br-core-0-8_br-core_E0-8_UofC_stn_Rep0_VS_2011-1104_q30_Rep0.narrowPeak.gz
Iso1.CG16778-0-8_CG16778_E0-8_UofC_stn_Rep1	CG16778	E0-8	148	macs2.idrOptimal.bf.dm3.Iso1.CG16778-0-8_CG16778_E0-8_UofC_stn_Rep0_VS_2011-1229_q30_Rep0.narrowPeak.gz
Iso1.CG16778-0-8_CG16778_E0-8_UofC_stn_Rep2	CG16778	E0-8	148	macs2.idrOptimal.bf.dm3.Iso1.CG16778-0-8_CG16778_E0-8_UofC_stn_Rep0_VS_2011-1229_q30_Rep0.narrowPeak.gz
Iso1.CNC-16-24_CNC_E16-24_UofC_stn_Rep1	cnc	E16-24	689	macs2.idrOptimal.bf.dm3.Iso1.CNC-16-24_CNC_E16-24_UofC_stn_Rep0_VS_2011-590_q30_Rep0.narrowPeak.gz
Iso1.CNC-16-24_CNC_E16-24_UofC_stn_Rep2	cnc	E16-24	689	macs2.idrOptimal.bf.dm3.Iso1.CNC-16-24_CNC_E16-24_UofC_stn_Rep0_VS_2011-590_q30_Rep0.narrowPeak.gz
Iso1.CNC-WPP_CNC_WPP_UofC_stn_Rep1	cnc	WPP	147	macs2.idrOptimal.bf.dm3.Iso1.CNC-WPP_CNC_WPP_UofC_stn_Rep0_VS_2011-1116_q30_Rep0.narrowPeak.gz
Iso1.CNC-WPP_CNC_WPP_UofC_stn_Rep2	cnc	WPP	147	macs2.idrOptimal.bf.dm3.Iso1.CNC-WPP_CNC_WPP_UofC_stn_Rep0_VS_2011-1116_q30_Rep0.narrowPeak.gz
Iso1.Dll-WPP_Dll_WPP_UofC_stn_Rep1	Dll	WPP	2987	macs2.idrOptimal.bf.dm3.Iso1.Dll-WPP_Dll_WPP_UofC_stn_Rep0_VS_2011-1825_q30_Rep0.narrowPeak.gz
Iso1.Dll-WPP_Dll_WPP_UofC_stn_Rep2	Dll	WPP	2987	macs2.idrOptimal.bf.dm3.Iso1.Dll-WPP_Dll_WPP_UofC_stn_Rep0_VS_2011-1825_q30_Rep0.narrowPeak.gz
Iso1.H-0-8_H_E0-8_UofC_stn_Rep1	h	E0-8	1777	macs2.idrOptimal.bf.dm3.Iso1.H-0-8_H_E0-8_UofC_stn_Rep0_VS_2011-1845_q30_Rep0.narrowPeak.gz
Iso1.H-0-8_H_E0-8_UofC_stn_Rep2	h	E0-8	1777	macs2.idrOptimal.bf.dm3.Iso1.H-0-8_H_E0-8_UofC_stn_Rep0_VS_2011-1845_q30_Rep0.narrowPeak.gz
Iso1.modMDG4-W3L_modMDG4_W3L_UofC_stn_Rep1	mod(mdg4)	W3L	235	macs2.idrOptimal.bf.dm3.Iso1.modMDG4-W3L_modMDG4_W3L_UofC_stn_Rep0_VS_2011-769_q30_Rep0.narrowPeak.gz
Iso1.modMDG4-W3L_modMDG4_W3L_UofC_stn_Rep2	mod(mdg4)	W3L	235	macs2.idrOptimal.bf.dm3.Iso1.modMDG4-W3L_modMDG4_W3L_UofC_stn_Rep0_VS_2011-769_q30_Rep0.narrowPeak.gz
Iso1.Prd-RF12-0-12_Prd_E0-12_UofC_stn_Rep1	prd	E0-12	353	macs2.idrOptimal.bf.dm3.Iso1.Prd-RF12-0-12_Prd_E0-12_UofC_stn_Rep0_VS_2011-719_q30_Rep0.narrowPeak.gz
Iso1.Prd-RF12-0-12_Prd_E0-12_UofC_stn_Rep2	prd	E0-12	353	macs2.idrOptimal.bf.dm3.Iso1.Prd-RF12-0-12_Prd_E0-12_UofC_stn_Rep0_VS_2011-719_q30_Rep0.narrowPeak.gz
Iso1.Prd-RF13-0-12_Prd_E0-12_UofC_stn_Rep1	prd	E0-12	132	macs2.idrOptimal.bf.dm3.Iso1.Prd-RF13-0-12_Prd_E0-12_UofC_stn_Rep0_VS_2011-719_q30_Rep0.narrowPeak.gz
Iso1.Prd-RF13-0-12_Prd_E0-12_UofC_stn_Rep2	prd	E0-12	132	macs2.idrOptimal.bf.dm3.Iso1.Prd-RF13-0-12_Prd_E0-12_UofC_stn_Rep0_VS_2011-719_q30_Rep0.narrowPeak.gz
Iso1.psq-Kc_psq_Kc167_UofC_stn_Rep1	psq	Kc167	446	macs2.idrOptimal.bf.dm3.Iso1.psq-Kc_psq_Kc167_UofC_stn_Rep0_VS_2011-1123_q30_Rep0.narrowPeak.gz
Iso1.psq-Kc_psq_Kc167_UofC_stn_Rep2	psq	Kc167	446	macs2.idrOptimal.bf.dm3.Iso1.psq-Kc_psq_Kc167_UofC_stn_Rep0_VS_2011-1123_q30_Rep0.narrowPeak.gz
Iso1.psq-WPP_psq_WPP_UofC_stn_Rep1	psq	WPP	996	macs2.idrOptimal.bf.dm3.Iso1.psq-WPP_psq_WPP_UofC_stn_Rep0_VS_2011-663_q30_Rep0.narrowPeak.gz
Iso1.psq-WPP_psq_WPP_UofC_stn_Rep2	psq	WPP	996	macs2.idrOptimal.bf.dm3.Iso1.psq-WPP_psq_WPP_UofC_stn_Rep0_VS_2011-663_q30_Rep0.narrowPeak.gz
Iso1.sc-0-12_sc_E0-12_UofC_stn_Rep1	sc	E0-12	194	macs2.idrOptimal.bf.dm3.Iso1.sc-0-12_sc_E0-12_UofC_stn_Rep0_VS_2011-719_q30_Rep0.narrowPeak.gz
Iso1.sc-0-12_sc_E0-12_UofC_stn_Rep2	sc	E0-12	194	macs2.idrOptimal.bf.dm3.Iso1.sc-0-12_sc_E0-12_UofC_stn_Rep0_VS_2011-719_q30_Rep0.narrowPeak.gz
Iso1.sc-0-8_sc_E0-8_UofC_stn_Rep1	sc	E0-8	138	macs2.idrOptimal.bf.dm3.Iso1.sc-0-8_sc_E0-8_UofC_stn_Rep0_VS_2011-653_q30_Rep0.narrowPeak.gz
Iso1.sc-0-8_sc_E0-8_UofC_stn_Rep2	sc	E0-8	138	macs2.idrOptimal.bf.dm3.Iso1.sc-0-8_sc_E0-8_UofC_stn_Rep0_VS_2011-653_q30_Rep0.narrowPeak.gz
Iso1.Sin3A-Kc_Sin3A_Kc167_UofC_stn_Rep1	Sin3A	Kc167	589	macs2.idrOptimal.bf.dm3.Iso1.Sin3A-Kc_Sin3A_Kc167_UofC_stn_Rep0_VS_2011-1098_q30_Rep0.narrowPeak.gz
Iso1.Sin3A-Kc_Sin3A_Kc167_UofC_stn_Rep2	Sin3A	Kc167	589	macs2.idrOptimal.bf.dm3.Iso1.Sin3A-Kc_Sin3A_Kc167_UofC_stn_Rep0_VS_2011-1098_q30_Rep0.narrowPeak.gz
Iso1.Stat92E-WPP_Stat92E_WPP_UofC_stn_Rep1	Stat92E	WPP	292	macs2.idrOptimal.bf.dm3.Iso1.Stat92E-WPP_Stat92E_WPP_UofC_stn_Rep0_VS_2011-953_q30_Rep0.narrowPeak.gz
Iso1.Stat92E-WPP_Stat92E_WPP_UofC_stn_Rep2	Stat92E	WPP	292	macs2.idrOptimal.bf.dm3.Iso1.Stat92E-WPP_Stat92E_WPP_UofC_stn_Rep0_VS_2011-953_q30_Rep0.narrowPeak.gz
Iso1.SuH-0-8_SuH_E0-8_UofC_stn_Rep1	Su(H)	E0-8	125	macs2.idrOptimal.bf.dm3.Iso1.SuH-0-8_SuH_E0-8_UofC_stn_Rep0_VS_2011-1845_q30_Rep0.narrowPeak.gz
Iso1.SuH-0-8_SuH_E0-8_UofC_stn_Rep2	Su(H)	E0-8	125	macs2.idrOptimal.bf.dm3.Iso1.SuH-0-8_SuH_E0-8_UofC_stn_Rep0_VS_2011-1845_q30_Rep0.narrowPeak.gz
Iso1.SuH-0-8_SuH_E0-8_UofC_stn_Rep3	Su(H)	E0-8	125	macs2.idrOptimal.bf.dm3.Iso1.SuH-0-8_SuH_E0-8_UofC_stn_Rep0_VS_2011-1845_q30_Rep0.narrowPeak.gz
Iso1.SuH-16-24_SuH_E16-24_UofC_stn_Rep1	Su(H)	E16-24	239	macs2.idrOptimal.bf.dm3.Iso1.SuH-16-24_SuH_E16-24_UofC_stn_Rep0_VS_2011-595_q30_Rep0.narrowPeak.gz
Iso1.SuH-16-24_SuH_E16-24_UofC_stn_Rep2	Su(H)	E16-24	239	macs2.idrOptimal.bf.dm3.Iso1.SuH-16-24_SuH_E16-24_UofC_stn_Rep0_VS_2011-595_q30_Rep0.narrowPeak.gz
Iso1.SuH-8-16_SuH_E8-16_UofC_stn_Rep1	Su(H)	E8-16	48	macs2.idrOptimal.bf.dm3.Iso1.SuH-8-16_SuH_E8-16_UofC_stn_Rep0_VS_2011-598_q30_Rep0.narrowPeak.gz
Iso1.SuH-8-16_SuH_E8-16_UofC_stn_Rep2	Su(H)	E8-16	48	macs2.idrOptimal.bf.dm3.Iso1.SuH-8-16_SuH_E8-16_UofC_stn_Rep0_VS_2011-598_q30_Rep0.narrowPeak.gz
Iso1.TCF-0-8_TCF_E0-8_UofC_stn_Rep1	pan	E0-8	1469	macs2.idrOptimal.bf.dm3.Iso1.TCF-0-8_TCF_E0-8_UofC_stn_Rep0_VS_2011-1713_q30_Rep0.narrowPeak.gz
Iso1.TCF-0-8_TCF_E0-8_UofC_stn_Rep2	pan	E0-8	1469	macs2.idrOptimal.bf.dm3.Iso1.TCF-0-8_TCF_E0-8_UofC_stn_Rep0_VS_2011-1713_q30_Rep0.narrowPeak.gz
Iso1.Ttk-Kc_Ttk_Kc167_UofC_stn_Rep1	ttk	Kc167	4289	macs2.idrOptimal.bf.dm3.Iso1.Ttk-Kc_Ttk_Kc167_UofC_stn_Rep0_VS_2011-1098_q30_Rep0.narrowPeak.gz
Iso1.Ttk-Kc_Ttk_Kc167_UofC_stn_Rep2	ttk	Kc167	4289	macs2.idrOptimal.bf.dm3.Iso1.Ttk-Kc_Ttk_Kc167_UofC_stn_Rep0_VS_2011-1098_q30_Rep0.narrowPeak.gz
Iso1.Usp-W3L_Usp_W3L_UofC_stn_Rep1	usp	W3L	443	macs2.idrOptimal.bf.dm3.Iso1.Usp-W3L_Usp_W3L_UofC_stn_Rep0_VS_2011-1244_q30_Rep0.narrowPeak.gz
Iso1.Usp-W3L_Usp_W3L_UofC_stn_Rep2	usp	W3L	443	macs2.idrOptimal.bf.dm3.Iso1.Usp-W3L_Usp_W3L_UofC_stn_Rep0_VS_2011-1244_q30_Rep0.narrowPeak.gz
Kc167.H-Kc_H_Kc167_UofC_stn_Rep1	h	Kc167	215	macs2.idrOptimal.bf.dm3.Kc167.H-Kc_H_Kc167_UofC_stn_Rep0_VS_2012-95_q30_Rep0.narrowPeak.gz
Kc167.H-Kc_H_Kc167_UofC_stn_Rep2	h	Kc167	215	macs2.idrOptimal.bf.dm3.Kc167.H-Kc_H_Kc167_UofC_stn_Rep0_VS_2012-95_q30_Rep0.narrowPeak.gz
Kc167.H-Kc_H_Kc167_UofC_stn_Rep3	h	Kc167	215	macs2.idrOptimal.bf.dm3.Kc167.H-Kc_H_Kc167_UofC_stn_Rep0_VS_2012-95_q30_Rep0.narrowPeak.gz
Kc167.insv-Kc_insv_Kc167_UofC_stn_Rep1	insv	Kc167	218	macs2.idrOptimal.bf.dm3.Kc167.insv-Kc_insv_Kc167_UofC_stn_Rep0_VS_2012-95_q30_Rep0.narrowPeak.gz
Kc167.insv-Kc_insv_Kc167_UofC_stn_Rep2	insv	Kc167	218	macs2.idrOptimal.bf.dm3.Kc167.insv-Kc_insv_Kc167_UofC_stn_Rep0_VS_2012-95_q30_Rep0.narrowPeak.gz
Kc167.insv-Kc_insv_Kc167_UofC_stn_Rep3	insv	Kc167	218	macs2.idrOptimal.bf.dm3.Kc167.insv-Kc_insv_Kc167_UofC_stn_Rep0_VS_2012-95_q30_Rep0.narrowPeak.gz
Kc167.Myc-Kc167_Myc_Kc167_UofC_stn_Rep1	dm	Kc167	92	macs2.idrOptimal.bf.dm3.Kc167.Myc-Kc167_Myc_Kc167_UofC_stn_Rep0_VS_2012-95_q30_Rep0.narrowPeak.gz
Kc167.Myc-Kc167_Myc_Kc167_UofC_stn_Rep2	dm	Kc167	92	macs2.idrOptimal.bf.dm3.Kc167.Myc-Kc167_Myc_Kc167_UofC_stn_Rep0_VS_2012-95_q30_Rep0.narrowPeak.gz
Kc167.SuH-Kc_SuH_Kc167_UofC_stn_Rep1	Su(H)	Kc167	2013	macs2.idrOptimal.bf.dm3.Kc167.SuH-Kc_SuH_Kc167_UofC_stn_Rep0_VS_2012-95_q30_Rep0.narrowPeak.gz
Kc167.SuH-Kc_SuH_Kc167_UofC_stn_Rep2	Su(H)	Kc167	2013	macs2.idrOptimal.bf.dm3.Kc167.SuH-Kc_SuH_Kc167_UofC_stn_Rep0_VS_2012-95_q30_Rep0.narrowPeak.gz
Kc167.SuH-Kc_SuH_Kc167_UofC_stn_Rep3	Su(H)	Kc167	2013	macs2.idrOptimal.bf.dm3.Kc167.SuH-Kc_SuH_Kc167_UofC_stn_Rep0_VS_2012-95_q30_Rep0.narrowPeak.gz
LolaI-GFP.LolaI-GFP-W3L_LolaI_W3L_UofC_stn_Rep1	lola	W3L	324	macs2.idrOptimal.bf.dm3.LolaI-GFP.LolaI-GFP-W3L_LolaI_W3L_UofC_stn_Rep0_VS_2012-46_q30_Rep0.narrowPeak.gz
LolaI-GFP.LolaI-GFP-W3L_LolaI_W3L_UofC_stn_Rep2	lola	W3L	324	macs2.idrOptimal.bf.dm3.LolaI-GFP.LolaI-GFP-W3L_LolaI_W3L_UofC_stn_Rep0_VS_2012-46_q30_Rep0.narrowPeak.gz
LolaJ-GFP.LolaJ-GFP-0-12_LolaJ_E0-12_UofC_stn_Rep1	lola	E0-12	295	macs2.idrOptimal.bf.dm3.LolaJ-GFP.LolaJ-GFP-0-12_LolaJ_E0-12_UofC_stn_Rep0_VS_2012-280_q30_Rep0.narrowPeak.gz
LolaJ-GFP.LolaJ-GFP-0-12_LolaJ_E0-12_UofC_stn_Rep2	lola	E0-12	295	macs2.idrOptimal.bf.dm3.LolaJ-GFP.LolaJ-GFP-0-12_LolaJ_E0-12_UofC_stn_Rep0_VS_2012-280_q30_Rep0.narrowPeak.gz
LolaJ-GFP.LolaJ-GFP-12-24_LolaJ_E12-24_UofC_stn_Rep1	lola	E12-24	797	macs2.idrOptimal.bf.dm3.LolaJ-GFP.LolaJ-GFP-12-24_LolaJ_E12-24_UofC_stn_Rep0_VS_2012-283_q30_Rep0.narrowPeak.gz
LolaJ-GFP.LolaJ-GFP-12-24_LolaJ_E12-24_UofC_stn_Rep2	lola	E12-24	797	macs2.idrOptimal.bf.dm3.LolaJ-GFP.LolaJ-GFP-12-24_LolaJ_E12-24_UofC_stn_Rep0_VS_2012-283_q30_Rep0.narrowPeak.gz
R13-YFP.3400_eve_Embryos-1-6-hr_UofC_stn_Rep1	eve	Embryos-1-6-hr	160	macs2.idrOptimal.bf.dm3.R13-YFP.3400_eve_Embryos-1-6-hr_UofC_stn_Rep0_VS_3400-Input-R1_3400-Input-R2_merged_controls_q30_Rep0.narrowPeak.gz
R13-YFP.3400_eve_Embryos-1-6-hr_UofC_stn_Rep2	eve	Embryos-1-6-hr	160	macs2.idrOptimal.bf.dm3.R13-YFP.3400_eve_Embryos-1-6-hr_UofC_stn_Rep0_VS_3400-Input-R1_3400-Input-R2_merged_controls_q30_Rep0.narrowPeak.gz
Stat92E-GFP.Stat92E-GFP-0-12_Stat92E_E0-12_UofC_stn_Rep1	Stat92E	E0-12	199	macs2.idrOptimal.bf.dm3.Stat92E-GFP.Stat92E-GFP-0-12_Stat92E_E0-12_UofC_stn_Rep0_VS_2012-231_q30_Rep0.narrowPeak.gz
Stat92E-GFP.Stat92E-GFP-0-12_Stat92E_E0-12_UofC_stn_Rep2	Stat92E	E0-12	199	macs2.idrOptimal.bf.dm3.Stat92E-GFP.Stat92E-GFP-0-12_Stat92E_E0-12_UofC_stn_Rep0_VS_2012-231_q30_Rep0.narrowPeak.gz
Stat92E-GFP.Stat92E-GFP-12-24_Stat92E_E12-24_UofC_stn_Rep1	Stat92E	E12-24	159	macs2.idrOptimal.bf.dm3.Stat92E-GFP.Stat92E-GFP-12-24_Stat92E_E12-24_UofC_stn_Rep0_VS_2012-234_q30_Rep0.narrowPeak.gz
Stat92E-GFP.Stat92E-GFP-12-24_Stat92E_E12-24_UofC_stn_Rep2	Stat92E	E12-24	159	macs2.idrOptimal.bf.dm3.Stat92E-GFP.Stat92E-GFP-12-24_Stat92E_E12-24_UofC_stn_Rep0_VS_2012-234_q30_Rep0.narrowPeak.gz
strain.3237_PCL_Embryos-0-8-hr_UofC_stn_Rep1	Pcl	Embryos-0-8-hr	1217	macs2.idrOptimal.bf.dm3.strain.3237_PCL_Embryos-0-8-hr_UofC_stn_Rep0_VS_3237-Input-R1_q30_Rep0.narrowPeak.gz
strain.3237_PCL_Embryos-0-8-hr_UofC_stn_Rep2	Pcl	Embryos-0-8-hr	1217	macs2.idrOptimal.bf.dm3.strain.3237_PCL_Embryos-0-8-hr_UofC_stn_Rep0_VS_3237-Input-R1_q30_Rep0.narrowPeak.gz
strain.3237_PCL_Embryos-0-8-hr_UofC_stn_Rep3	Pcl	Embryos-0-8-hr	1217	macs2.idrOptimal.bf.dm3.strain.3237_PCL_Embryos-0-8-hr_UofC_stn_Rep0_VS_3237-Input-R1_q30_Rep0.narrowPeak.gz
strain.3239_eve_Embryos-1-6-hr_UofC_stn_Rep1	eve	Embryos-1-6-hr	353	macs2.idrOptimal.bf.dm3.strain.3239_eve_Embryos-1-6-hr_UofC_stn_Rep0_VS_3239-Input-R1_3239-Input-R2_merged_controls_q30_Rep0.narrowPeak.gz
strain.3239_eve_Embryos-1-6-hr_UofC_stn_Rep2	eve	Embryos-1-6-hr	353	macs2.idrOptimal.bf.dm3.strain.3239_eve_Embryos-1-6-hr_UofC_stn_Rep0_VS_3239-Input-R1_3239-Input-R2_merged_controls_q30_Rep0.narrowPeak.gz
USP-GFP.USP-GFP-0-12_USP_E0-12_UofC_stn_Rep1	usp	E0-12	497	macs2.idrOptimal.bf.dm3.USP-GFP.USP-GFP-0-12_USP_E0-12_UofC_stn_Rep0_VS_2011-1625_q30_Rep0.narrowPeak.gz
USP-GFP.USP-GFP-0-12_USP_E0-12_UofC_stn_Rep2	usp	E0-12	497	macs2.idrOptimal.bf.dm3.USP-GFP.USP-GFP-0-12_USP_E0-12_UofC_stn_Rep0_VS_2011-1625_q30_Rep0.narrowPeak.gz
USP-GFP.USP-GFP-WPP12_USP_WPP12_UofC_stn_Rep1	usp	WPP12	362	macs2.idrOptimal.bf.dm3.USP-GFP.USP-GFP-WPP12_USP_WPP12_UofC_stn_Rep0_VS_2011-1526_q30_Rep0.narrowPeak.gz
USP-GFP.USP-GFP-WPP12_USP_WPP12_UofC_stn_Rep2	usp	WPP12	362	macs2.idrOptimal.bf.dm3.USP-GFP.USP-GFP-WPP12_USP_WPP12_UofC_stn_Rep0_VS_2011-1526_q30_Rep0.narrowPeak.gz
USP-GFP.USP-GFP-WPP12_USP_WPP12_UofC_stn_Rep3	usp	WPP12	362	macs2.idrOptimal.bf.dm3.USP-GFP.USP-GFP-WPP12_USP_WPP12_UofC_stn_Rep0_VS_2011-1526_q30_Rep0.narrowPeak.gz
